# Supplementary material for: Mechanisms and stereoselectivities of the DABCO-catalyzed Rauhut–Currier reaction of α,β-unsaturated ketones and aryl acrylates: a computational investigation
Source: Royal Society of Chemistry journal article supplement (doi:10.1039/c6ra25311c), 2017-01-01
Supplement: c6ra25311c1.pdf [file c6ra25311c1.pdf]

*Supporting Information*

**Mechanisms and Stereoselectivities of DABCO-Catalyzed Rauhut-Currier Reaction of  $\alpha,\beta$ -unsaturated ketones and aryl acrylates: A Computational Investigation**

**Yan Li\*, Ruixue Tian, Shiwen Du**

*“School of Petroleum and Chemical Engineering, Dalian University of Technology,  
Panjin Campus, Panjin, 124221, China.*

***Corresponding person: Yan Li***

***E-mail: snow2007liyan@163.com***

***Telephone: +86-15142738951***

***Fax: 86-427-2631111***

Fig S1. Free energy profiles for the formation of P(RRS). The solvation-corrected relative free energies at SMD(CH<sub>3</sub>CN)/M06-2X/6-311++G(d,p) level are given in kcal/mol. Red line: in the absence; blue line: in the presence of PhOH.

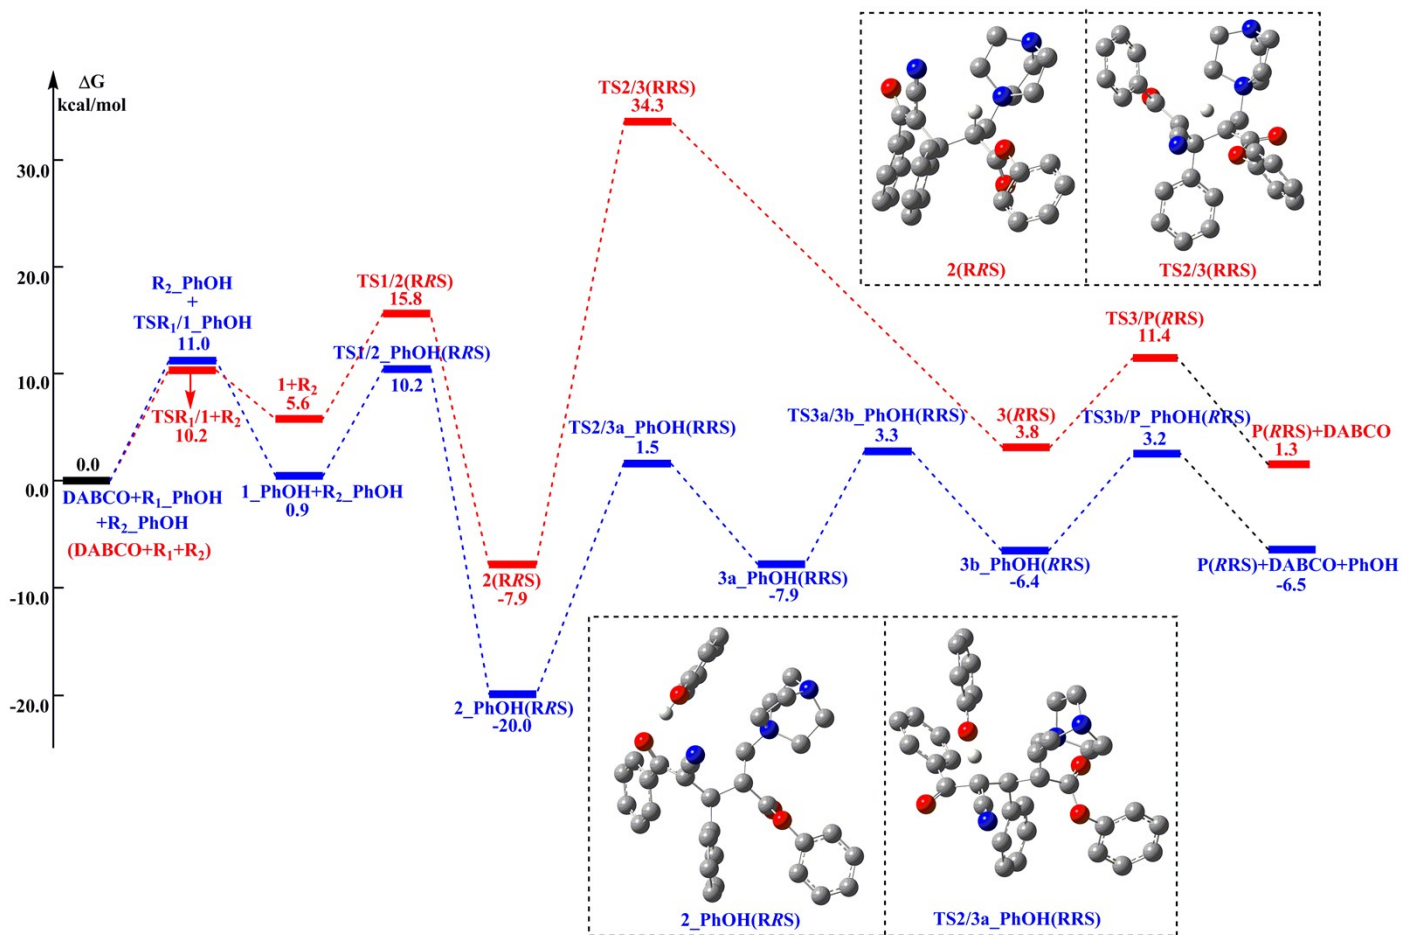

Fig S2. Free energy profiles for the formation of P(RSR). The solvation-corrected relative free energies at SMD(CH<sub>3</sub>CN)/M06-2X/6-311++G(d,p) level are given in kcal/mol. Red line: in the absence; blue line: in the presence of PhOH.

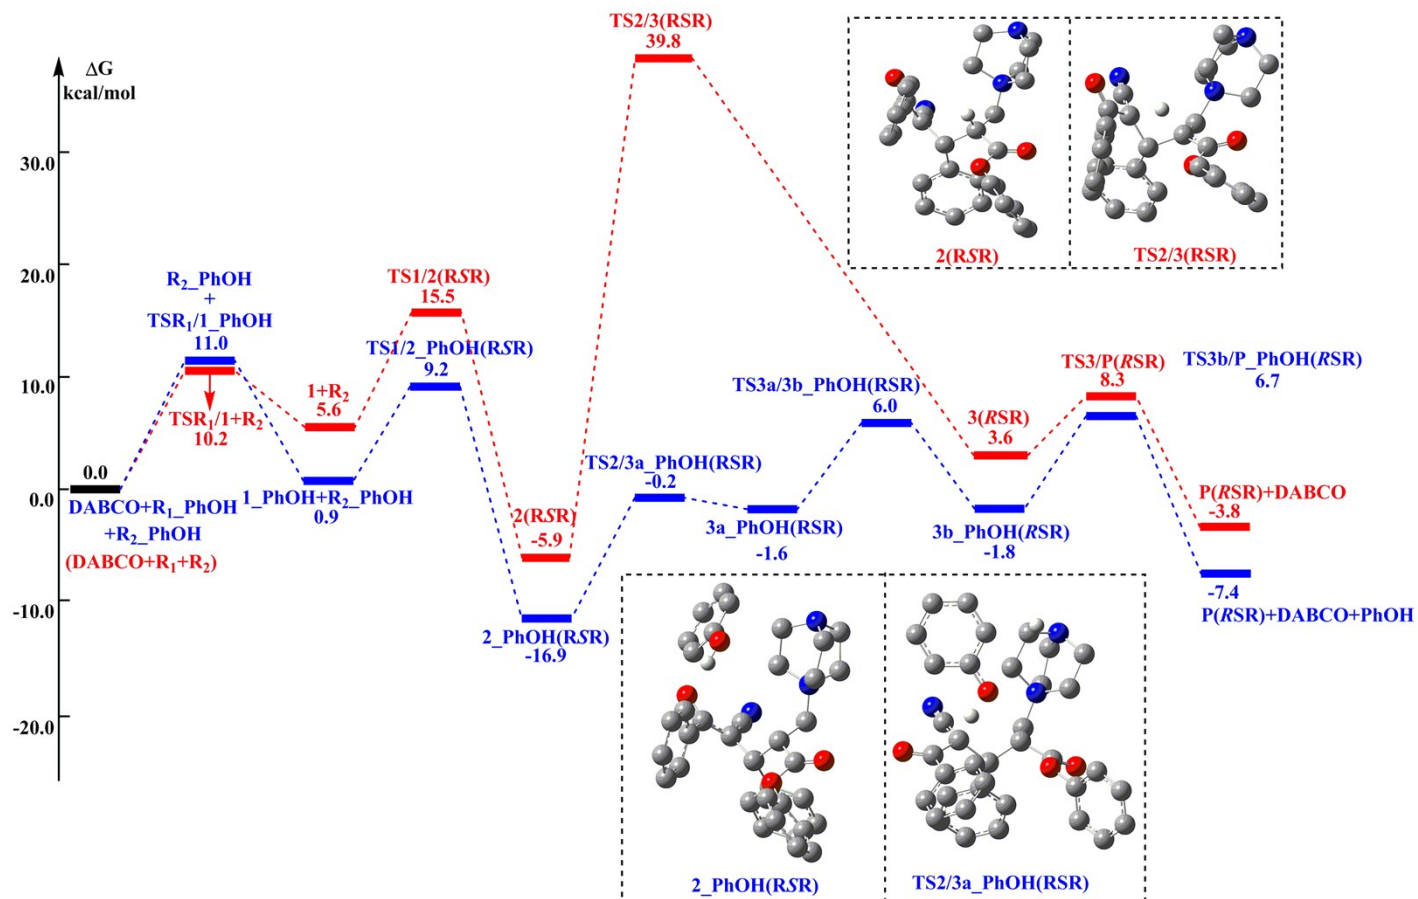

Fig S3. Free energy profiles for the formation of P(SRS). The solvation-corrected relative free energies at SMD(CH<sub>3</sub>CN)/M06-2X/6-311++G(d,p) level are given in kcal/mol. Red line: in the absence; blue line: in the presence of PhOH.

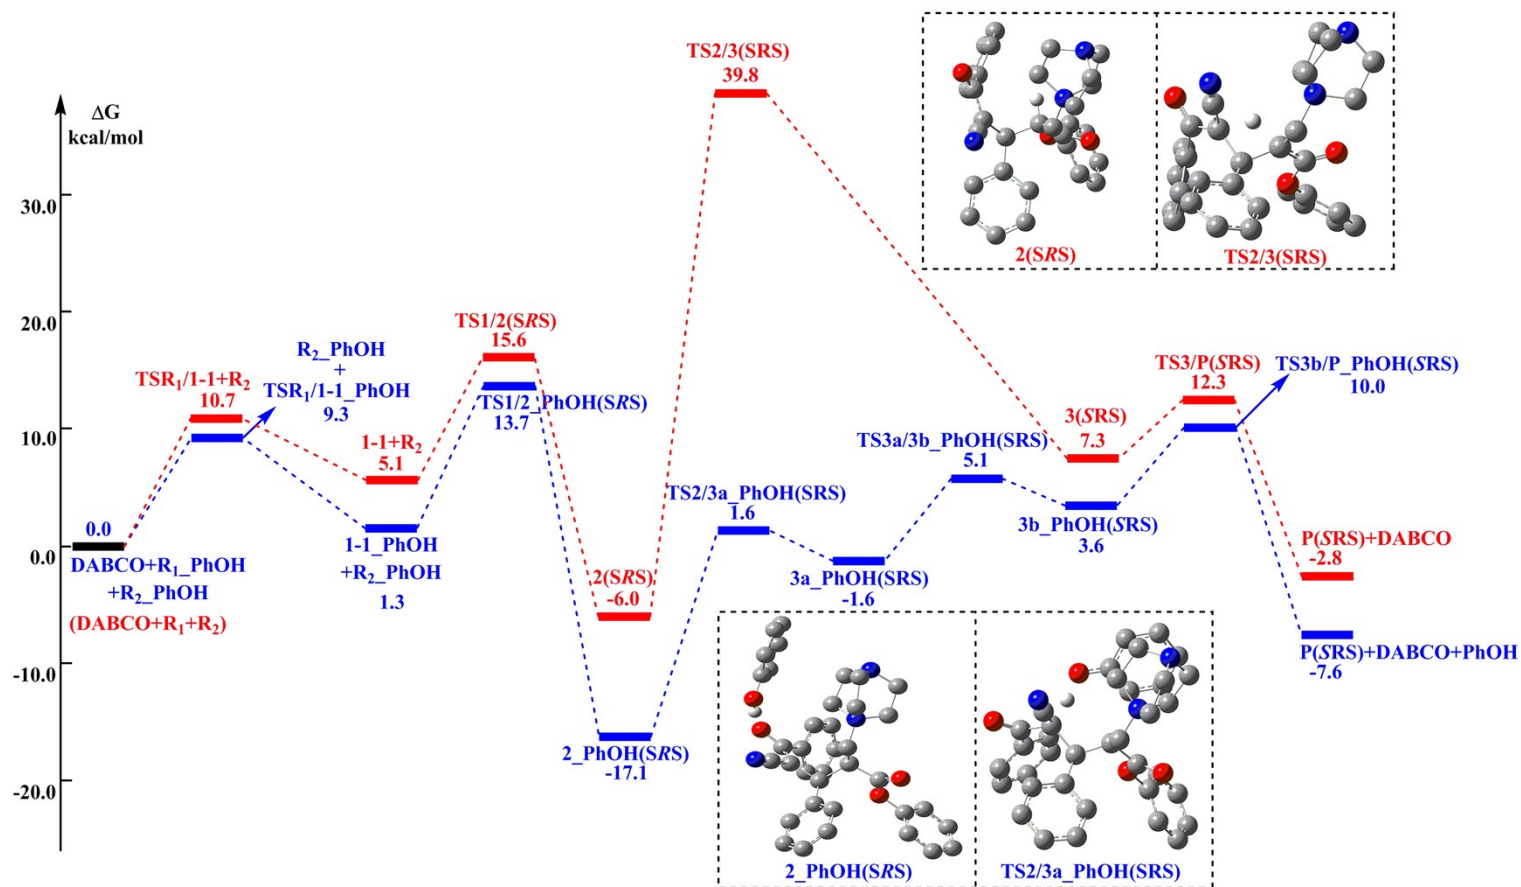

Fig S4. Free energy profiles for the formation of P(SSR). The solvation-corrected relative free energies at SMD(CH<sub>3</sub>CN)/M06-2X/6-311++G(d,p) level are given in kcal/mol. Red line: in the absence; blue line: in the presence of PhOH.

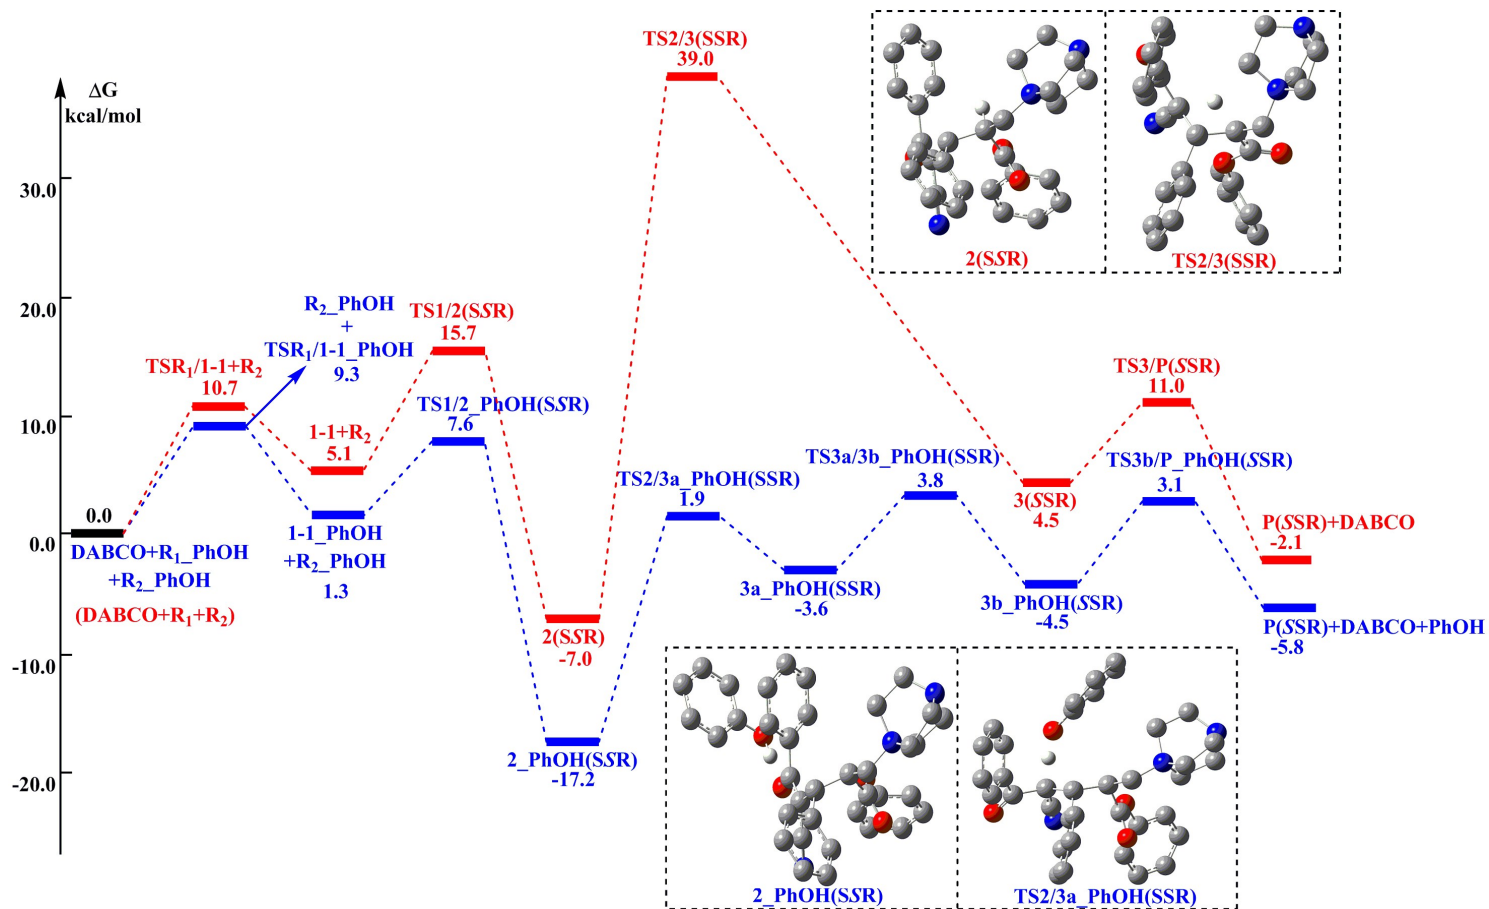

## Cartesian coordinates for optimized structures

(Energies are given in Hartree, imaginary frequencies are given in i)

### Part 1 In the absence of PhOH

R<sub>1</sub>

SCF Done: E(RM062X) = -498.006170182

| Center<br>Number | Atomic<br>Number | Atomic<br>Type | Coordinates (Angstroms) |           |           |
|------------------|------------------|----------------|-------------------------|-----------|-----------|
|                  |                  |                | X                       | Y         | Z         |
| 1                | 6                | 0              | -3.012664               | -0.411718 | -0.376650 |
| 2                | 6                | 0              | -4.119506               | 0.099516  | 0.156984  |
| 3                | 1                | 0              | -3.029019               | -1.165406 | -1.157434 |
| 4                | 1                | 0              | -5.104296               | -0.218857 | -0.169872 |
| 5                | 1                | 0              | -4.062757               | 0.853597  | 0.937892  |
| 6                | 6                | 0              | -1.686064               | 0.048476  | 0.096791  |
| 7                | 8                | 0              | -1.485169               | 0.875266  | 0.951460  |
| 8                | 8                | 0              | -0.697072               | -0.605210 | -0.567385 |
| 9                | 6                | 0              | 0.624600                | -0.279181 | -0.280396 |
| 10               | 6                | 0              | 1.453255                | -1.299987 | 0.166539  |
| 11               | 6                | 0              | 1.105455                | 1.005600  | -0.510138 |
| 12               | 6                | 0              | 2.801466                | -1.025608 | 0.390125  |
| 13               | 1                | 0              | 1.039918                | -2.290713 | 0.327513  |
| 14               | 6                | 0              | 2.452864                | 1.267503  | -0.277907 |

|    |   |   |          |           |           |
|----|---|---|----------|-----------|-----------|
| 15 | 1 | 0 | 0.434408 | 1.780863  | -0.865215 |
| 16 | 6 | 0 | 3.302087 | 0.256043  | 0.171515  |
| 17 | 1 | 0 | 3.458266 | -1.817828 | 0.736293  |
| 18 | 1 | 0 | 2.840406 | 2.266778  | -0.451629 |
| 19 | 1 | 0 | 4.352043 | 0.467261  | 0.348672  |

**R<sub>2</sub>**

SCF Done: E(RM062X) = -745.985911527

| Center<br>Number | Atomic<br>Number | Atomic<br>Type | Coordinates (Angstroms) |           |           |
|------------------|------------------|----------------|-------------------------|-----------|-----------|
|                  |                  |                | X                       | Y         | Z         |
| 1                | 6                | 0              | -0.054573               | 1.116080  | -0.008099 |
| 2                | 6                | 0              | -0.660744               | -0.082678 | -0.175366 |
| 3                | 1                | 0              | -0.008952               | -0.911660 | -0.443342 |
| 4                | 6                | 0              | -0.776603               | 2.340181  | 0.201718  |
| 5                | 7                | 0              | -1.330313               | 3.343762  | 0.365546  |
| 6                | 6                | 0              | -2.079040               | -0.428716 | -0.109417 |
| 7                | 6                | 0              | -3.043067               | 0.328176  | 0.576804  |
| 8                | 6                | 0              | -2.476184               | -1.607616 | -0.761674 |
| 9                | 6                | 0              | -4.372097               | -0.077214 | 0.582185  |
| 10               | 1                | 0              | -2.756871               | 1.215433  | 1.130111  |
| 11               | 6                | 0              | -3.808718               | -2.001055 | -0.766283 |
| 12               | 1                | 0              | -1.728033               | -2.206508 | -1.274494 |
| 13               | 6                | 0              | -4.759625               | -1.233988 | -0.095078 |

|    |   |   |           |           |           |
|----|---|---|-----------|-----------|-----------|
| 14 | 1 | 0 | -5.109011 | 0.509086  | 1.122237  |
| 15 | 1 | 0 | -4.103331 | -2.907455 | -1.285767 |
| 16 | 1 | 0 | -5.800964 | -1.541715 | -0.089760 |
| 17 | 6 | 0 | 1.416539  | 1.322552  | -0.217355 |
| 18 | 8 | 0 | 1.816482  | 2.418978  | -0.566287 |
| 19 | 6 | 0 | 2.366046  | 0.188172  | -0.014193 |
| 20 | 6 | 0 | 2.178627  | -0.784673 | 0.974054  |
| 21 | 6 | 0 | 3.520298  | 0.164019  | -0.805525 |
| 22 | 6 | 0 | 3.137555  | -1.777770 | 1.159448  |
| 23 | 1 | 0 | 1.301746  | -0.753270 | 1.613807  |
| 24 | 6 | 0 | 4.464676  | -0.840037 | -0.630708 |
| 25 | 1 | 0 | 3.660715  | 0.933552  | -1.558301 |
| 26 | 6 | 0 | 4.273732  | -1.811337 | 0.353330  |
| 27 | 1 | 0 | 2.996953  | -2.524032 | 1.934973  |
| 28 | 1 | 0 | 5.351742  | -0.864496 | -1.255877 |
| 29 | 1 | 0 | 5.015421  | -2.591673 | 0.494844  |

-----

**DABCO**

SCF Done: E(RM062X) = -345.186667534

-----

| Center<br>Number | Atomic<br>Number | Atomic<br>Type | Coordinates (Angstroms) |           |           |
|------------------|------------------|----------------|-------------------------|-----------|-----------|
|                  |                  |                | X                       | Y         | Z         |
| 1                | 6                | 0              | 0.777913                | -0.719727 | -1.175483 |
| 2                | 6                | 0              | -0.777698               | -0.719924 | -1.175504 |



|    |   |   |           |           |           |
|----|---|---|-----------|-----------|-----------|
| 3  | 1 | 0 | 1.175202  | -0.231125 | -2.071672 |
| 4  | 1 | 0 | 1.174286  | -1.740424 | -1.145068 |
| 5  | 1 | 0 | -1.175086 | -0.231598 | -2.071800 |
| 6  | 1 | 0 | -1.173805 | -1.740718 | -1.144902 |
| 7  | 6 | 0 | 0.777821  | 1.378412  | -0.035090 |
| 8  | 1 | 0 | 1.175068  | 1.908820  | 0.837002  |
| 9  | 1 | 0 | 1.174948  | 1.863643  | -0.933298 |
| 10 | 6 | 0 | -0.777947 | 1.378335  | -0.035329 |
| 11 | 1 | 0 | -1.175514 | 1.908868  | 0.836542  |
| 12 | 1 | 0 | -1.174849 | 1.863359  | -0.933748 |
| 13 | 6 | 0 | -0.778046 | -0.658521 | 1.210772  |
| 14 | 1 | 0 | -1.175390 | -0.124174 | 2.080394  |
| 15 | 1 | 0 | -1.174742 | -1.679356 | 1.234340  |
| 16 | 6 | 0 | 0.777956  | -0.658580 | 1.210797  |
| 17 | 1 | 0 | 1.175314  | -0.124442 | 2.080542  |
| 18 | 1 | 0 | 1.174574  | -1.679451 | 1.234166  |
| 19 | 7 | 0 | 1.286187  | 0.000534  | -0.000169 |
| 20 | 7 | 0 | -1.286188 | 0.000413  | -0.000329 |

-----

**TSR<sub>1</sub>/1**

SCF Done: E(RM062X) = -843.190884153

Imaginary Frequencies = -166.7130

-----

| Center | Atomic | Atomic | Coordinates (Angstroms) |  |  |
|--------|--------|--------|-------------------------|--|--|
|--------|--------|--------|-------------------------|--|--|

| Number | Number | Type | X         | Y         | Z         |
|--------|--------|------|-----------|-----------|-----------|
| 1      | 6      | 0    | 0.016151  | -1.511592 | 0.960742  |
| 2      | 6      | 0    | -1.101740 | -1.981317 | 0.323087  |
| 3      | 1      | 0    | 0.108013  | -1.505901 | 2.040443  |
| 4      | 1      | 0    | -1.832892 | -2.573857 | 0.867602  |
| 5      | 1      | 0    | -1.065060 | -2.141375 | -0.752457 |
| 6      | 6      | 0    | 1.093351  | -0.961481 | 0.178433  |
| 7      | 8      | 0    | 1.152574  | -0.836148 | -1.030801 |
| 8      | 8      | 0    | 2.138075  | -0.564231 | 0.997340  |
| 9      | 6      | 0    | 3.294963  | -0.077698 | 0.424696  |
| 10     | 6      | 0    | 3.773875  | 1.140769  | 0.896588  |
| 11     | 6      | 0    | 4.008516  | -0.807761 | -0.524542 |
| 12     | 6      | 0    | 4.982912  | 1.636705  | 0.412534  |
| 13     | 1      | 0    | 3.198346  | 1.682596  | 1.640771  |
| 14     | 6      | 0    | 5.211377  | -0.298720 | -1.006568 |
| 15     | 1      | 0    | 3.621264  | -1.756693 | -0.878195 |
| 16     | 6      | 0    | 5.702935  | 0.921584  | -0.542025 |
| 17     | 1      | 0    | 5.359078  | 2.585320  | 0.783823  |
| 18     | 1      | 0    | 5.769159  | -0.862893 | -1.748331 |
| 19     | 1      | 0    | 6.643368  | 1.309837  | -0.920655 |
| 20     | 6      | 0    | -4.734589 | 0.129032  | -0.895384 |
| 21     | 6      | 0    | -3.673876 | -1.004430 | -0.771186 |
| 22     | 1      | 0    | -5.666902 | -0.153918 | -0.396605 |
| 23     | 1      | 0    | -4.959742 | 0.337120  | -1.945741 |
| 24     | 1      | 0    | -4.080746 | -1.890507 | -0.272724 |

|    |   |   |           |           |           |
|----|---|---|-----------|-----------|-----------|
| 25 | 1 | 0 | -3.282983 | -1.305737 | -1.748550 |
| 26 | 6 | 0 | -4.011461 | 1.117871  | 1.155653  |
| 27 | 1 | 0 | -3.609140 | 2.034614  | 1.597670  |
| 28 | 1 | 0 | -4.973771 | 0.904870  | 1.631192  |
| 29 | 6 | 0 | -3.027738 | -0.071460 | 1.344318  |
| 30 | 1 | 0 | -2.152325 | 0.205991  | 1.941767  |
| 31 | 1 | 0 | -3.514659 | -0.928270 | 1.821322  |
| 32 | 6 | 0 | -1.906836 | 0.617091  | -0.662920 |
| 33 | 1 | 0 | -1.075657 | 0.956380  | -0.035244 |
| 34 | 1 | 0 | -1.491344 | 0.241313  | -1.602572 |
| 35 | 6 | 0 | -2.964185 | 1.733939  | -0.895083 |
| 36 | 1 | 0 | -2.631868 | 2.683909  | -0.465252 |
| 37 | 1 | 0 | -3.137759 | 1.887697  | -1.964696 |
| 38 | 7 | 0 | -4.243018 | 1.365198  | -0.273266 |
| 39 | 7 | 0 | -2.547197 | -0.508436 | 0.028132  |

-----

**TSR<sub>1</sub>/1-1**

SCF Done: E(RM062X) = -843.190944930

Imaginary Frequencies = -175.7559

-----

| Center<br>Number | Atomic<br>Number | Atomic<br>Type | Coordinates (Angstroms) |           |           |
|------------------|------------------|----------------|-------------------------|-----------|-----------|
|                  |                  |                | X                       | Y         | Z         |
| 1                | 6                | 0              | -0.013375               | -1.872301 | 0.298006  |
| 2                | 6                | 0              | 1.125670                | -2.044399 | -0.445872 |

-----

|    |   |   |           |           |           |
|----|---|---|-----------|-----------|-----------|
| 3  | 1 | 0 | -0.110758 | -2.258198 | 1.305916  |
| 4  | 1 | 0 | 1.870157  | -2.777226 | -0.143747 |
| 5  | 1 | 0 | 1.099866  | -1.804182 | -1.506845 |
| 6  | 6 | 0 | -1.094530 | -1.091494 | -0.243177 |
| 7  | 8 | 0 | -1.160323 | -0.550052 | -1.331829 |
| 8  | 8 | 0 | -2.152284 | -1.031894 | 0.651644  |
| 9  | 6 | 0 | -3.240162 | -0.244758 | 0.334913  |
| 10 | 6 | 0 | -4.494558 | -0.845198 | 0.331763  |
| 11 | 6 | 0 | -3.100073 | 1.123049  | 0.106458  |
| 12 | 6 | 0 | -5.626258 | -0.066275 | 0.096363  |
| 13 | 1 | 0 | -4.571236 | -1.912095 | 0.517176  |
| 14 | 6 | 0 | -4.235890 | 1.890280  | -0.134520 |
| 15 | 1 | 0 | -2.111689 | 1.571048  | 0.118660  |
| 16 | 6 | 0 | -5.500571 | 1.300663  | -0.140937 |
| 17 | 1 | 0 | -6.606901 | -0.533011 | 0.096629  |
| 18 | 1 | 0 | -4.131369 | 2.956169  | -0.315061 |
| 19 | 1 | 0 | -6.382625 | 1.905060  | -0.329235 |
| 20 | 6 | 0 | 3.594590  | -0.574545 | -1.128295 |
| 21 | 6 | 0 | 4.612165  | 0.558534  | -0.799552 |
| 22 | 1 | 0 | 4.054915  | -1.566472 | -1.072297 |
| 23 | 1 | 0 | 3.155618  | -0.450361 | -2.123288 |
| 24 | 1 | 0 | 5.575122  | 0.139790  | -0.490991 |
| 25 | 1 | 0 | 4.781778  | 1.193523  | -1.674398 |
| 26 | 6 | 0 | 3.047571  | -0.650153 | 1.208057  |
| 27 | 1 | 0 | 2.201655  | -0.707068 | 1.902004  |
| 28 | 1 | 0 | 3.600314  | -1.593867 | 1.257719  |

|    |   |   |          |           |           |
|----|---|---|----------|-----------|-----------|
| 29 | 6 | 0 | 3.965740 | 0.570399  | 1.499829  |
| 30 | 1 | 0 | 3.545705 | 1.196680  | 2.293100  |
| 31 | 1 | 0 | 4.959857 | 0.240533  | 1.816587  |
| 32 | 6 | 0 | 2.786382 | 1.917784  | -0.072618 |
| 33 | 1 | 0 | 2.448410 | 2.593539  | 0.719076  |
| 34 | 1 | 0 | 2.893434 | 2.499414  | -0.993620 |
| 35 | 6 | 0 | 1.781215 | 0.748873  | -0.274123 |
| 36 | 1 | 0 | 0.987478 | 0.750286  | 0.481532  |
| 37 | 1 | 0 | 1.310386 | 0.772353  | -1.261310 |
| 38 | 7 | 0 | 2.502157 | -0.524204 | -0.148816 |
| 39 | 7 | 0 | 4.109734 | 1.398048  | 0.295401  |

1

SCF Done: E(RM062X) = -843.201122008

| Center<br>Number | Atomic<br>Number | Atomic<br>Type | Coordinates (Angstroms) |           |           |
|------------------|------------------|----------------|-------------------------|-----------|-----------|
|                  |                  |                | X                       | Y         | Z         |
| 1                | 6                | 0              | -0.105439               | -0.872790 | 1.232817  |
| 2                | 6                | 0              | -1.322398               | -1.483899 | 0.697484  |
| 3                | 1                | 0              | -0.002305               | -0.672188 | 2.291362  |
| 4                | 1                | 0              | -1.866620               | -2.095734 | 1.424243  |
| 5                | 1                | 0              | -1.123771               | -2.072688 | -0.204164 |
| 6                | 6                | 0              | 0.954341                | -0.631129 | 0.368839  |
| 7                | 8                | 0              | 1.031964                | -0.795446 | -0.855215 |

|    |   |   |           |           |           |
|----|---|---|-----------|-----------|-----------|
| 8  | 8 | 0 | 2.076629  | -0.099194 | 1.068308  |
| 9  | 6 | 0 | 3.267733  | 0.055175  | 0.422928  |
| 10 | 6 | 0 | 3.985463  | 1.221613  | 0.695865  |
| 11 | 6 | 0 | 3.821333  | -0.923336 | -0.409679 |
| 12 | 6 | 0 | 5.248669  | 1.412779  | 0.140918  |
| 13 | 1 | 0 | 3.540679  | 1.965879  | 1.349822  |
| 14 | 6 | 0 | 5.080506  | -0.716830 | -0.967017 |
| 15 | 1 | 0 | 3.261390  | -1.825966 | -0.620002 |
| 16 | 6 | 0 | 5.801124  | 0.447097  | -0.698330 |
| 17 | 1 | 0 | 5.798929  | 2.322438  | 0.364499  |
| 18 | 1 | 0 | 5.503935  | -1.478343 | -1.616308 |
| 19 | 1 | 0 | 6.783108  | 0.596648  | -1.136786 |
| 20 | 6 | 0 | -4.717236 | -0.274959 | -0.699954 |
| 21 | 6 | 0 | -3.558762 | -1.257175 | -0.404384 |
| 22 | 1 | 0 | -5.529371 | -0.412494 | 0.019092  |
| 23 | 1 | 0 | -5.111364 | -0.456020 | -1.703219 |
| 24 | 1 | 0 | -3.843148 | -2.037805 | 0.304750  |
| 25 | 1 | 0 | -3.163059 | -1.722730 | -1.310301 |
| 26 | 6 | 0 | -3.909410 | 1.398141  | 0.789096  |
| 27 | 1 | 0 | -3.436253 | 2.383090  | 0.827865  |
| 28 | 1 | 0 | -4.824506 | 1.432798  | 1.385800  |
| 29 | 6 | 0 | -2.958238 | 0.316006  | 1.351246  |
| 30 | 1 | 0 | -2.093945 | 0.738798  | 1.867277  |
| 31 | 1 | 0 | -3.468133 | -0.386942 | 2.015478  |
| 32 | 6 | 0 | -1.872782 | 0.446816  | -0.825216 |
| 33 | 1 | 0 | -1.144496 | 1.072441  | -0.306837 |

|    |   |   |           |           |           |
|----|---|---|-----------|-----------|-----------|
| 34 | 1 | 0 | -1.344013 | -0.161846 | -1.560134 |
| 35 | 6 | 0 | -3.044960 | 1.257573  | -1.424468 |
| 36 | 1 | 0 | -2.775451 | 2.315692  | -1.477833 |
| 37 | 1 | 0 | -3.275286 | 0.910980  | -2.435932 |
| 38 | 7 | 0 | -4.254435 | 1.112782  | -0.607126 |
| 39 | 7 | 0 | -2.427670 | -0.488406 | 0.206514  |

1-1

SCF Done: E(RM062X) = -843.201244461

| Center<br>Number | Atomic<br>Number | Atomic<br>Type | Coordinates (Angstroms) |           |           |
|------------------|------------------|----------------|-------------------------|-----------|-----------|
|                  |                  |                | X                       | Y         | Z         |
| 1                | 6                | 0              | 0.113084                | -1.648254 | 0.289464  |
| 2                | 6                | 0              | 1.383269                | -1.710501 | -0.435420 |
| 3                | 1                | 0              | -0.007483               | -2.141850 | 1.245114  |
| 4                | 1                | 0              | 1.981896                | -2.599673 | -0.212083 |
| 5                | 1                | 0              | 1.241231                | -1.625515 | -1.517798 |
| 6                | 6                | 0              | -0.966340               | -1.016414 | -0.311164 |
| 7                | 8                | 0              | -1.035432               | -0.408778 | -1.387271 |
| 8                | 8                | 0              | -2.151841               | -1.168310 | 0.467641  |
| 9                | 6                | 0              | -3.211658               | -0.342418 | 0.241256  |
| 10               | 6                | 0              | -4.486015               | -0.904122 | 0.342355  |
| 11               | 6                | 0              | -3.073622               | 1.030245  | 0.007819  |
| 12               | 6                | 0              | -5.616715               | -0.100649 | 0.216227  |

|    |   |   |           |           |           |
|----|---|---|-----------|-----------|-----------|
| 13 | 1 | 0 | -4.572364 | -1.970955 | 0.526059  |
| 14 | 6 | 0 | -4.210642 | 1.822003  | -0.124522 |
| 15 | 1 | 0 | -2.083162 | 1.461866  | -0.077000 |
| 16 | 6 | 0 | -5.486422 | 1.266152  | -0.021776 |
| 17 | 1 | 0 | -6.602594 | -0.548806 | 0.302567  |
| 18 | 1 | 0 | -4.096302 | 2.887259  | -0.305922 |
| 19 | 1 | 0 | -6.367467 | 1.892487  | -0.123177 |
| 20 | 6 | 0 | 3.579450  | -0.664329 | -1.030612 |
| 21 | 6 | 0 | 4.638474  | 0.368900  | -0.576253 |
| 22 | 1 | 0 | 3.940466  | -1.692747 | -0.958379 |
| 23 | 1 | 0 | 3.223864  | -0.479685 | -2.047260 |
| 24 | 1 | 0 | 5.462715  | -0.127987 | -0.057513 |
| 25 | 1 | 0 | 5.044532  | 0.889927  | -1.447121 |
| 26 | 6 | 0 | 2.847398  | -0.605877 | 1.287426  |
| 27 | 1 | 0 | 1.953254  | -0.679388 | 1.909412  |
| 28 | 1 | 0 | 3.433359  | -1.523433 | 1.386632  |
| 29 | 6 | 0 | 3.679291  | 0.664165  | 1.582556  |
| 30 | 1 | 0 | 3.108142  | 1.362992  | 2.200076  |
| 31 | 1 | 0 | 4.589059  | 0.392778  | 2.124243  |
| 32 | 6 | 0 | 2.823137  | 1.877197  | -0.278986 |
| 33 | 1 | 0 | 2.455368  | 2.715843  | 0.318082  |
| 34 | 1 | 0 | 3.080466  | 2.251642  | -1.273711 |
| 35 | 6 | 0 | 1.735572  | 0.783781  | -0.372848 |
| 36 | 1 | 0 | 0.965244  | 0.886991  | 0.392927  |
| 37 | 1 | 0 | 1.247872  | 0.734875  | -1.347632 |
| 38 | 7 | 0 | 2.385397  | -0.546991 | -0.134474 |



39            7            0            4.044675    1.348534    0.338245

---

**TS1/2(RRS)**

SCF Done: E(RM062X) = -1589.19485197

Imaginary Frequencies = -181.7942

---

| Center<br>Number | Atomic<br>Number | Atomic<br>Type | Coordinates (Angstroms) |           |           |
|------------------|------------------|----------------|-------------------------|-----------|-----------|
|                  |                  |                | X                       | Y         | Z         |
| 1                | 6                | 0              | 0.040293                | 0.667704  | -0.808582 |
| 2                | 6                | 0              | 1.456844                | 0.467926  | -0.476327 |
| 3                | 1                | 0              | -0.272229               | 0.783103  | -1.839223 |
| 4                | 1                | 0              | 1.954639                | -0.232190 | -1.158812 |
| 5                | 1                | 0              | 1.570722                | 0.113455  | 0.553612  |
| 6                | 6                | 0              | -0.856514               | 1.002246  | 0.222937  |
| 7                | 8                | 0              | -0.647575               | 0.989377  | 1.437028  |
| 8                | 8                | 0              | -2.113625               | 1.335690  | -0.289162 |
| 9                | 6                | 0              | -3.175021               | 1.636291  | 0.523478  |
| 10               | 6                | 0              | -4.071684               | 2.576506  | 0.011000  |
| 11               | 6                | 0              | -3.437175               | 1.016487  | 1.749499  |
| 12               | 6                | 0              | -5.226858               | 2.899440  | 0.717532  |
| 13               | 1                | 0              | -3.850847               | 3.040253  | -0.945750 |
| 14               | 6                | 0              | -4.594380               | 1.353999  | 2.448455  |
| 15               | 1                | 0              | -2.742720               | 0.288679  | 2.144830  |
| 16               | 6                | 0              | -5.493736               | 2.291755  | 1.942966  |

|    |   |   |           |           |           |
|----|---|---|-----------|-----------|-----------|
| 17 | 1 | 0 | -5.918078 | 3.629645  | 0.306651  |
| 18 | 1 | 0 | -4.793364 | 0.869457  | 3.400373  |
| 19 | 1 | 0 | -6.392656 | 2.543641  | 2.497097  |
| 20 | 6 | 0 | 4.643788  | 2.583767  | -0.130862 |
| 21 | 6 | 0 | 3.775923  | 1.308816  | -0.241048 |
| 22 | 1 | 0 | 5.564632  | 2.455643  | -0.705255 |
| 23 | 1 | 0 | 4.911812  | 2.775006  | 0.911542  |
| 24 | 1 | 0 | 4.088405  | 0.656109  | -1.060051 |
| 25 | 1 | 0 | 3.754300  | 0.735561  | 0.688558  |
| 26 | 6 | 0 | 3.402337  | 3.437792  | -1.973976 |
| 27 | 1 | 0 | 2.982413  | 4.344609  | -2.416283 |
| 28 | 1 | 0 | 4.239990  | 3.107740  | -2.594096 |
| 29 | 6 | 0 | 2.314518  | 2.340117  | -1.903473 |
| 30 | 1 | 0 | 1.306048  | 2.739271  | -2.025211 |
| 31 | 1 | 0 | 2.475292  | 1.540449  | -2.630223 |
| 32 | 6 | 0 | 1.938061  | 2.742784  | 0.472377  |
| 33 | 1 | 0 | 0.871715  | 2.915812  | 0.326912  |
| 34 | 1 | 0 | 2.096206  | 2.291820  | 1.454548  |
| 35 | 6 | 0 | 2.783530  | 4.019469  | 0.249741  |
| 36 | 1 | 0 | 2.175517  | 4.805660  | -0.205798 |
| 37 | 1 | 0 | 3.157944  | 4.386039  | 1.208607  |
| 38 | 7 | 0 | 3.917001  | 3.749578  | -0.638342 |
| 39 | 7 | 0 | 2.360398  | 1.716615  | -0.538613 |
| 40 | 6 | 0 | 0.557114  | -2.524879 | -1.095021 |
| 41 | 6 | 0 | -0.447087 | -1.783427 | -0.506724 |
| 42 | 1 | 0 | -0.306439 | -1.520048 | 0.538347  |

|    |   |   |           |           |           |
|----|---|---|-----------|-----------|-----------|
| 43 | 6 | 0 | 0.443834  | -3.019234 | -2.432243 |
| 44 | 7 | 0 | 0.361333  | -3.439821 | -3.510827 |
| 45 | 6 | 0 | -1.840982 | -1.686055 | -0.977811 |
| 46 | 6 | 0 | -2.203669 | -1.514383 | -2.320881 |
| 47 | 6 | 0 | -2.848550 | -1.771509 | -0.009770 |
| 48 | 6 | 0 | -3.544612 | -1.445697 | -2.680521 |
| 49 | 1 | 0 | -1.437744 | -1.398966 | -3.081035 |
| 50 | 6 | 0 | -4.191525 | -1.713669 | -0.372891 |
| 51 | 1 | 0 | -2.573076 | -1.894016 | 1.035086  |
| 52 | 6 | 0 | -4.543177 | -1.550864 | -1.710119 |
| 53 | 1 | 0 | -3.812842 | -1.301025 | -3.722932 |
| 54 | 1 | 0 | -4.959656 | -1.784636 | 0.391917  |
| 55 | 1 | 0 | -5.589113 | -1.497254 | -1.997372 |
| 56 | 6 | 0 | 1.866472  | -2.802730 | -0.469172 |
| 57 | 8 | 0 | 2.821394  | -3.160958 | -1.148605 |
| 58 | 6 | 0 | 2.036407  | -2.662522 | 1.015884  |
| 59 | 6 | 0 | 3.253981  | -2.152403 | 1.479882  |
| 60 | 6 | 0 | 1.073754  | -3.093656 | 1.933503  |
| 61 | 6 | 0 | 3.490848  | -2.035156 | 2.845088  |
| 62 | 1 | 0 | 4.004986  | -1.844693 | 0.757378  |
| 63 | 6 | 0 | 1.321692  | -2.995452 | 3.301303  |
| 64 | 1 | 0 | 0.140859  | -3.525668 | 1.581562  |
| 65 | 6 | 0 | 2.522902  | -2.456973 | 3.757748  |
| 66 | 1 | 0 | 4.431310  | -1.624092 | 3.199693  |
| 67 | 1 | 0 | 0.575996  | -3.343412 | 4.009568  |
| 68 | 1 | 0 | 2.709331  | -2.372354 | 4.824306  |

-----  
**TS1/2(RSR)**

SCF Done: E(RM062X) = -1589.19503746

Imaginary Frequencies = -176.0713  
-----

| Center<br>Number | Atomic<br>Number | Atomic<br>Type | Coordinates (Angstroms) |           |          |
|------------------|------------------|----------------|-------------------------|-----------|----------|
|                  |                  |                | X                       | Y         | Z        |
| 1                | 6                | 0              | -0.134226               | 2.534843  | 1.323113 |
| 2                | 6                | 0              | 0.515971                | 1.321616  | 1.426387 |
| 3                | 1                | 0              | 1.328626                | 1.158320  | 0.729056 |
| 4                | 6                | 0              | -1.133894               | 2.974056  | 2.244158 |
| 5                | 7                | 0              | -1.935187               | 3.366329  | 2.987293 |
| 6                | 6                | 0              | 0.494167                | 0.362663  | 2.536331 |
| 7                | 6                | 0              | -0.558778               | 0.224535  | 3.455934 |
| 8                | 6                | 0              | 1.611173                | -0.479239 | 2.662408 |
| 9                | 6                | 0              | -0.476162               | -0.713343 | 4.480284 |
| 10               | 1                | 0              | -1.452064               | 0.832256  | 3.368218 |
| 11               | 6                | 0              | 1.697211                | -1.405203 | 3.695929 |
| 12               | 1                | 0              | 2.422255                | -0.391276 | 1.943027 |
| 13               | 6                | 0              | 0.651844                | -1.523797 | 4.610162 |
| 14               | 1                | 0              | -1.299128               | -0.811861 | 5.181695 |
| 15               | 1                | 0              | 2.576033                | -2.037342 | 3.782278 |
| 16               | 1                | 0              | 0.710996                | -2.249184 | 5.416021 |
| 17               | 6                | 0              | 0.028762                | 3.424035  | 0.156696 |

|    |   |   |           |           |           |
|----|---|---|-----------|-----------|-----------|
| 18 | 8 | 0 | -0.760064 | 4.336097  | -0.057391 |
| 19 | 6 | 0 | 1.153767  | 3.180305  | -0.808350 |
| 20 | 6 | 0 | 2.477356  | 3.005027  | -0.392043 |
| 21 | 6 | 0 | 0.853192  | 3.194089  | -2.173881 |
| 22 | 6 | 0 | 3.486870  | 2.830311  | -1.335784 |
| 23 | 1 | 0 | 2.719117  | 3.020543  | 0.667387  |
| 24 | 6 | 0 | 1.860239  | 2.997949  | -3.114199 |
| 25 | 1 | 0 | -0.175000 | 3.349505  | -2.488453 |
| 26 | 6 | 0 | 3.178366  | 2.816777  | -2.695400 |
| 27 | 1 | 0 | 4.514542  | 2.704855  | -1.008863 |
| 28 | 1 | 0 | 1.618898  | 2.992724  | -4.172767 |
| 29 | 1 | 0 | 3.965760  | 2.670156  | -3.428730 |
| 30 | 6 | 0 | -0.567210 | -0.153158 | -0.298221 |
| 31 | 6 | 0 | -1.863610 | -0.325677 | 0.365548  |
| 32 | 1 | 0 | -0.379141 | 0.698114  | -0.939369 |
| 33 | 1 | 0 | -2.268912 | 0.619887  | 0.749740  |
| 34 | 1 | 0 | -1.791130 | -1.049556 | 1.183652  |
| 35 | 6 | 0 | 0.377343  | -1.189285 | -0.241639 |
| 36 | 8 | 0 | 0.283345  | -2.294638 | 0.289113  |
| 37 | 8 | 0 | 1.581622  | -0.778679 | -0.845669 |
| 38 | 6 | 0 | 2.652507  | -1.625123 | -0.976389 |
| 39 | 6 | 0 | 3.377493  | -1.497921 | -2.163639 |
| 40 | 6 | 0 | 3.082205  | -2.510709 | 0.016518  |
| 41 | 6 | 0 | 4.528249  | -2.254112 | -2.363425 |
| 42 | 1 | 0 | 3.027294  | -0.796038 | -2.914504 |
| 43 | 6 | 0 | 4.232675  | -3.267616 | -0.201074 |

|    |   |   |           |           |           |
|----|---|---|-----------|-----------|-----------|
| 44 | 1 | 0 | 2.516722  | -2.606733 | 0.933798  |
| 45 | 6 | 0 | 4.960390  | -3.147202 | -1.383603 |
| 46 | 1 | 0 | 5.085920  | -2.144770 | -3.289017 |
| 47 | 1 | 0 | 4.563499  | -3.956357 | 0.571175  |
| 48 | 1 | 0 | 5.856539  | -3.739938 | -1.538714 |
| 49 | 6 | 0 | -5.410134 | -1.463655 | -0.584765 |
| 50 | 6 | 0 | -4.223143 | -1.101638 | 0.338598  |
| 51 | 1 | 0 | -6.108439 | -0.625886 | -0.658659 |
| 52 | 1 | 0 | -5.945853 | -2.324087 | -0.176589 |
| 53 | 1 | 0 | -4.395869 | -0.183584 | 0.904129  |
| 54 | 1 | 0 | -3.968538 | -1.907839 | 1.030448  |
| 55 | 6 | 0 | -4.387514 | -0.570696 | -2.540110 |
| 56 | 1 | 0 | -3.916094 | -0.845441 | -3.487393 |
| 57 | 1 | 0 | -5.203210 | 0.125471  | -2.750163 |
| 58 | 6 | 0 | -3.359334 | 0.099400  | -1.597743 |
| 59 | 1 | 0 | -2.431057 | 0.360173  | -2.108835 |
| 60 | 1 | 0 | -3.759385 | 0.985771  | -1.099263 |
| 61 | 6 | 0 | -2.615068 | -2.179323 | -1.145964 |
| 62 | 1 | 0 | -1.819608 | -1.946530 | -1.855585 |
| 63 | 1 | 0 | -2.203438 | -2.809071 | -0.355636 |
| 64 | 6 | 0 | -3.865566 | -2.782518 | -1.826909 |
| 65 | 1 | 0 | -3.605622 | -3.135832 | -2.827853 |
| 66 | 1 | 0 | -4.245367 | -3.630645 | -1.250944 |
| 67 | 7 | 0 | -4.936406 | -1.786464 | -1.933229 |
| 68 | 7 | 0 | -3.008327 | -0.875039 | -0.513146 |

---

**TS1/2(SRS)**

SCF Done: E(RM062X) = -1589.19562912

Imaginary Frequencies = -152.7075

---

| Center<br>Number | Atomic<br>Number | Atomic<br>Type | Coordinates (Angstroms) |           |           |
|------------------|------------------|----------------|-------------------------|-----------|-----------|
|                  |                  |                | X                       | Y         | Z         |
| 1                | 6                | 0              | 0.720620                | 2.071322  | 1.467497  |
| 2                | 6                | 0              | -0.420458               | 1.653670  | 0.819069  |
| 3                | 1                | 0              | -0.532632               | 1.954127  | -0.216210 |
| 4                | 6                | 0              | 0.932931                | 1.827205  | 2.859986  |
| 5                | 7                | 0              | 1.115584                | 1.654867  | 3.993374  |
| 6                | 6                | 0              | -1.667642               | 1.205320  | 1.460656  |
| 7                | 6                | 0              | -1.711963               | 0.332570  | 2.556410  |
| 8                | 6                | 0              | -2.869053               | 1.725490  | 0.956626  |
| 9                | 6                | 0              | -2.928341               | 0.030637  | 3.162023  |
| 10               | 1                | 0              | -0.797532               | -0.120849 | 2.925732  |
| 11               | 6                | 0              | -4.081281               | 1.436633  | 1.574909  |
| 12               | 1                | 0              | -2.842077               | 2.379823  | 0.088662  |
| 13               | 6                | 0              | -4.112612               | 0.592238  | 2.683835  |
| 14               | 1                | 0              | -2.951233               | -0.647122 | 4.010209  |
| 15               | 1                | 0              | -5.001384               | 1.861423  | 1.184657  |
| 16               | 1                | 0              | -5.057834               | 0.360801  | 3.166260  |
| 17               | 6                | 0              | 1.898235                | 2.615345  | 0.758241  |
| 18               | 8                | 0              | 3.015138                | 2.549644  | 1.257938  |

|    |   |   |           |           |           |
|----|---|---|-----------|-----------|-----------|
| 19 | 6 | 0 | 1.725647  | 3.240519  | -0.593955 |
| 20 | 6 | 0 | 2.737028  | 3.044461  | -1.540348 |
| 21 | 6 | 0 | 0.641097  | 4.069031  | -0.902183 |
| 22 | 6 | 0 | 2.650755  | 3.645368  | -2.791712 |
| 23 | 1 | 0 | 3.586919  | 2.418952  | -1.283370 |
| 24 | 6 | 0 | 0.566678  | 4.685030  | -2.148767 |
| 25 | 1 | 0 | -0.131445 | 4.249878  | -0.160020 |
| 26 | 6 | 0 | 1.565198  | 4.467176  | -3.096485 |
| 27 | 1 | 0 | 3.431200  | 3.479603  | -3.528039 |
| 28 | 1 | 0 | -0.271067 | 5.336019  | -2.379163 |
| 29 | 1 | 0 | 1.500039  | 4.941783  | -4.071093 |
| 30 | 6 | 0 | 0.330102  | -0.503415 | -0.325276 |
| 31 | 6 | 0 | 1.340832  | -0.885823 | 0.667499  |
| 32 | 1 | 0 | 0.584447  | 0.141933  | -1.156921 |
| 33 | 1 | 0 | 1.976452  | -0.046765 | 0.975750  |
| 34 | 1 | 0 | 0.869396  | -1.325692 | 1.552208  |
| 35 | 6 | 0 | -0.897775 | -1.182496 | -0.324308 |
| 36 | 8 | 0 | -1.279297 | -2.075408 | 0.432176  |
| 37 | 8 | 0 | -1.743079 | -0.690698 | -1.334333 |
| 38 | 6 | 0 | -3.029099 | -1.148492 | -1.450570 |
| 39 | 6 | 0 | -3.871184 | -1.356497 | -0.355280 |
| 40 | 6 | 0 | -3.510731 | -1.320474 | -2.749014 |
| 41 | 6 | 0 | -5.192042 | -1.739161 | -0.574675 |
| 42 | 1 | 0 | -3.485713 | -1.218800 | 0.646778  |
| 43 | 6 | 0 | -4.835189 | -1.698685 | -2.955013 |
| 44 | 1 | 0 | -2.838115 | -1.147117 | -3.583788 |



|    |   |   |           |           |           |
|----|---|---|-----------|-----------|-----------|
| 45 | 6 | 0 | -5.682109 | -1.912808 | -1.869050 |
| 46 | 1 | 0 | -5.845001 | -1.897024 | 0.279725  |
| 47 | 1 | 0 | -5.203550 | -1.826294 | -3.968888 |
| 48 | 1 | 0 | -6.714459 | -2.208667 | -2.029347 |
| 49 | 6 | 0 | 3.237254  | -2.309392 | 1.396240  |
| 50 | 6 | 0 | 4.380262  | -3.222187 | 0.894519  |
| 51 | 1 | 0 | 3.603787  | -1.373550 | 1.823584  |
| 52 | 1 | 0 | 2.589535  | -2.806377 | 2.122218  |
| 53 | 1 | 0 | 5.324450  | -2.672046 | 0.860658  |
| 54 | 1 | 0 | 4.499713  | -4.070303 | 1.573313  |
| 55 | 6 | 0 | 3.235411  | -1.428389 | -0.875197 |
| 56 | 1 | 0 | 2.573474  | -1.034954 | -1.648560 |
| 57 | 1 | 0 | 3.817988  | -0.608567 | -0.446282 |
| 58 | 6 | 0 | 4.121529  | -2.589822 | -1.386170 |
| 59 | 1 | 0 | 3.767398  | -2.941719 | -2.358806 |
| 60 | 1 | 0 | 5.152333  | -2.244654 | -1.498773 |
| 61 | 6 | 0 | 2.740096  | -4.293954 | -0.457918 |
| 62 | 1 | 0 | 2.570355  | -4.799888 | -1.411799 |
| 63 | 1 | 0 | 2.683613  | -5.038754 | 0.340792  |
| 64 | 6 | 0 | 1.672425  | -3.195259 | -0.252924 |
| 65 | 1 | 0 | 1.164405  | -2.921810 | -1.179539 |
| 66 | 1 | 0 | 0.920360  | -3.453116 | 0.494655  |
| 67 | 7 | 0 | 2.365554  | -1.952484 | 0.227513  |
| 68 | 7 | 0 | 4.089484  | -3.719461 | -0.452725 |

---

**TS1/2(SSR)**

SCF Done: E(RM062X) = -1589.19818499

Imaginary Frequencies = -167.3595

---

| Center<br>Number | Atomic<br>Number | Atomic<br>Type | Coordinates (Angstroms) |           |           |
|------------------|------------------|----------------|-------------------------|-----------|-----------|
|                  |                  |                | X                       | Y         | Z         |
| 1                | 6                | 0              | -0.587985               | -0.197666 | 0.210060  |
| 2                | 6                | 0              | -1.875785               | 0.217625  | -0.368489 |
| 3                | 1                | 0              | -0.444033               | -0.207665 | 1.283680  |
| 4                | 1                | 0              | -2.314384               | 1.080505  | 0.145168  |
| 5                | 1                | 0              | -1.771288               | 0.446760  | -1.433666 |
| 6                | 6                | 0              | 0.350200                | -0.849451 | -0.607263 |
| 7                | 8                | 0              | 0.309730                | -1.039249 | -1.823720 |
| 8                | 8                | 0              | 1.480738                | -1.225001 | 0.131007  |
| 9                | 6                | 0              | 2.424477                | -2.038355 | -0.449210 |
| 10               | 6                | 0              | 3.762315                | -1.724627 | -0.216766 |
| 11               | 6                | 0              | 2.079259                | -3.190694 | -1.159068 |
| 12               | 6                | 0              | 4.760934                | -2.567240 | -0.702355 |
| 13               | 1                | 0              | 3.998728                | -0.827501 | 0.348699  |
| 14               | 6                | 0              | 3.086902                | -4.019885 | -1.643897 |
| 15               | 1                | 0              | 1.035104                | -3.425168 | -1.330977 |
| 16               | 6                | 0              | 4.429878                | -3.714102 | -1.420978 |
| 17               | 1                | 0              | 5.802630                | -2.321252 | -0.517269 |
| 18               | 1                | 0              | 2.818050                | -4.914914 | -2.197633 |
| 19               | 1                | 0              | 5.209462                | -4.366962 | -1.801304 |

|    |   |   |           |           |           |
|----|---|---|-----------|-----------|-----------|
| 20 | 6 | 0 | -4.202775 | -0.296977 | -1.056113 |
| 21 | 6 | 0 | -5.389585 | -1.261670 | -0.829900 |
| 22 | 1 | 0 | -4.396346 | 0.704428  | -0.665613 |
| 23 | 1 | 0 | -3.915348 | -0.223414 | -2.107506 |
| 24 | 1 | 0 | -6.104168 | -0.832486 | -0.122557 |
| 25 | 1 | 0 | -5.906018 | -1.439354 | -1.776404 |
| 26 | 6 | 0 | -3.401930 | -1.138335 | 1.086782  |
| 27 | 1 | 0 | -2.488740 | -1.380190 | 1.633067  |
| 28 | 1 | 0 | -3.833823 | -0.219630 | 1.490895  |
| 29 | 6 | 0 | -4.410446 | -2.311834 | 1.067472  |
| 30 | 1 | 0 | -3.933137 | -3.233090 | 1.411816  |
| 31 | 1 | 0 | -5.247595 | -2.088229 | 1.733211  |
| 32 | 6 | 0 | -3.818968 | -3.024993 | -1.126456 |
| 33 | 1 | 0 | -3.562224 | -4.044227 | -0.827471 |
| 34 | 1 | 0 | -4.165417 | -3.048274 | -2.163132 |
| 35 | 6 | 0 | -2.577068 | -2.114281 | -0.989232 |
| 36 | 1 | 0 | -1.807639 | -2.548173 | -0.347897 |
| 37 | 1 | 0 | -2.126038 | -1.847590 | -1.946123 |
| 38 | 7 | 0 | -3.004694 | -0.834767 | -0.327222 |
| 39 | 7 | 0 | -4.919547 | -2.539379 | -0.287888 |
| 40 | 6 | 0 | 1.986677  | 1.709726  | 0.352682  |
| 41 | 6 | 0 | 0.653127  | 1.965535  | 0.093417  |
| 42 | 1 | 0 | 0.021373  | 2.149061  | 0.954242  |
| 43 | 6 | 0 | 2.965759  | 1.633414  | -0.684528 |
| 44 | 7 | 0 | 3.785581  | 1.590854  | -1.506053 |
| 45 | 6 | 0 | 0.078513  | 2.419188  | -1.181711 |

|    |   |   |           |           |           |
|----|---|---|-----------|-----------|-----------|
| 46 | 6 | 0 | 0.521657  | 1.975125  | -2.437407 |
| 47 | 6 | 0 | -0.995878 | 3.321201  | -1.123202 |
| 48 | 6 | 0 | -0.085585 | 2.445020  | -3.598619 |
| 49 | 1 | 0 | 1.306499  | 1.232486  | -2.508157 |
| 50 | 6 | 0 | -1.592327 | 3.796498  | -2.285992 |
| 51 | 1 | 0 | -1.354648 | 3.654180  | -0.152300 |
| 52 | 6 | 0 | -1.136168 | 3.359360  | -3.529133 |
| 53 | 1 | 0 | 0.260733  | 2.088750  | -4.564173 |
| 54 | 1 | 0 | -2.414183 | 4.503173  | -2.222064 |
| 55 | 1 | 0 | -1.601832 | 3.724079  | -4.439793 |
| 56 | 6 | 0 | 2.497352  | 1.343196  | 1.679843  |
| 57 | 8 | 0 | 3.636478  | 0.912329  | 1.831450  |
| 58 | 6 | 0 | 1.606325  | 1.468280  | 2.882426  |
| 59 | 6 | 0 | 0.926631  | 2.649843  | 3.194287  |
| 60 | 6 | 0 | 1.533257  | 0.376369  | 3.753016  |
| 61 | 6 | 0 | 0.174369  | 2.732637  | 4.364096  |
| 62 | 1 | 0 | 1.003937  | 3.509975  | 2.534438  |
| 63 | 6 | 0 | 0.763585  | 0.454522  | 4.909863  |
| 64 | 1 | 0 | 2.079280  | -0.531063 | 3.510762  |
| 65 | 6 | 0 | 0.084931  | 1.633967  | 5.217233  |
| 66 | 1 | 0 | -0.340648 | 3.656490  | 4.609248  |
| 67 | 1 | 0 | 0.699111  | -0.400692 | 5.575755  |
| 68 | 1 | 0 | -0.508396 | 1.698323  | 6.124399  |

---

**2(RRS)**

SCF Done: E(RM062X) = -1589.24120685

---

| Center<br>Number | Atomic<br>Number | Atomic<br>Type | Coordinates (Angstroms) |           |           |
|------------------|------------------|----------------|-------------------------|-----------|-----------|
|                  |                  |                | X                       | Y         | Z         |
| 1                | 6                | 0              | 0.098222                | 0.417163  | 0.039097  |
| 2                | 6                | 0              | -1.093908               | 0.900648  | -0.794434 |
| 3                | 1                | 0              | 0.196409                | 0.949186  | 0.989464  |
| 4                | 1                | 0              | -1.912555               | 0.177442  | -0.751984 |
| 5                | 1                | 0              | -0.797255               | 1.029201  | -1.838598 |
| 6                | 6                | 0              | 1.388713                | 0.585782  | -0.730779 |
| 7                | 8                | 0              | 1.549553                | 0.279608  | -1.884743 |
| 8                | 8                | 0              | 2.363449                | 1.090510  | 0.061781  |
| 9                | 6                | 0              | 3.674057                | 1.082113  | -0.410821 |
| 10               | 6                | 0              | 4.341418                | 2.295717  | -0.491320 |
| 11               | 6                | 0              | 4.299299                | -0.124850 | -0.705238 |
| 12               | 6                | 0              | 5.680201                | 2.300587  | -0.880290 |
| 13               | 1                | 0              | 3.816028                | 3.213662  | -0.247096 |
| 14               | 6                | 0              | 5.635082                | -0.104378 | -1.095752 |
| 15               | 1                | 0              | 3.742887                | -1.055555 | -0.629188 |
| 16               | 6                | 0              | 6.327127                | 1.104269  | -1.183012 |
| 17               | 1                | 0              | 6.215022                | 3.243218  | -0.944873 |
| 18               | 1                | 0              | 6.137941                | -1.038587 | -1.327029 |
| 19               | 1                | 0              | 7.370012                | 1.111659  | -1.484351 |
| 20               | 6                | 0              | -3.349773               | 3.946962  | -1.003837 |
| 21               | 6                | 0              | -2.844720               | 2.518198  | -1.306219 |

|    |   |   |           |           |           |
|----|---|---|-----------|-----------|-----------|
| 22 | 1 | 0 | -4.442088 | 3.950993  | -0.980774 |
| 23 | 1 | 0 | -3.016801 | 4.642361  | -1.778665 |
| 24 | 1 | 0 | -3.604458 | 1.753732  | -1.128957 |
| 25 | 1 | 0 | -2.458966 | 2.418155  | -2.321951 |
| 26 | 6 | 0 | -3.111897 | 3.386946  | 1.294279  |
| 27 | 1 | 0 | -2.875687 | 3.782549  | 2.284933  |
| 28 | 1 | 0 | -4.179344 | 3.154216  | 1.261360  |
| 29 | 6 | 0 | -2.270894 | 2.115344  | 1.035803  |
| 30 | 1 | 0 | -1.424113 | 2.045349  | 1.720095  |
| 31 | 1 | 0 | -2.856970 | 1.193282  | 1.095346  |
| 32 | 6 | 0 | -0.716117 | 3.336580  | -0.427329 |
| 33 | 1 | 0 | 0.174555  | 3.038966  | 0.129107  |
| 34 | 1 | 0 | -0.460913 | 3.456990  | -1.483216 |
| 35 | 6 | 0 | -1.386370 | 4.593554  | 0.176523  |
| 36 | 1 | 0 | -0.990667 | 4.793435  | 1.175560  |
| 37 | 1 | 0 | -1.175556 | 5.457694  | -0.457868 |
| 38 | 7 | 0 | -2.835379 | 4.411794  | 0.284950  |
| 39 | 7 | 0 | -1.706116 | 2.202950  | -0.363257 |
| 40 | 6 | 0 | -1.244319 | -1.227669 | 1.374084  |
| 41 | 6 | 0 | -0.120010 | -1.106305 | 0.362996  |
| 42 | 1 | 0 | -0.458663 | -1.558650 | -0.573940 |
| 43 | 6 | 0 | -1.060721 | -0.572526 | 2.607552  |
| 44 | 7 | 0 | -0.863151 | -0.011366 | 3.614714  |
| 45 | 6 | 0 | 1.174266  | -1.809681 | 0.739069  |
| 46 | 6 | 0 | 1.945755  | -1.418843 | 1.841202  |
| 47 | 6 | 0 | 1.625232  | -2.874062 | -0.047640 |

|    |   |   |           |           |           |
|----|---|---|-----------|-----------|-----------|
| 48 | 6 | 0 | 3.124587  | -2.091575 | 2.155088  |
| 49 | 1 | 0 | 1.625296  | -0.581932 | 2.456358  |
| 50 | 6 | 0 | 2.802508  | -3.552672 | 0.266735  |
| 51 | 1 | 0 | 1.043621  | -3.174033 | -0.916862 |
| 52 | 6 | 0 | 3.555265  | -3.163290 | 1.372039  |
| 53 | 1 | 0 | 3.710675  | -1.777088 | 3.013958  |
| 54 | 1 | 0 | 3.130271  | -4.381310 | -0.354454 |
| 55 | 1 | 0 | 4.473649  | -3.687070 | 1.620512  |
| 56 | 6 | 0 | -2.578156 | -1.626083 | 1.092165  |
| 57 | 8 | 0 | -3.556771 | -1.354898 | 1.820583  |
| 58 | 6 | 0 | -2.855289 | -2.427517 | -0.159068 |
| 59 | 6 | 0 | -3.998715 | -2.123171 | -0.904092 |
| 60 | 6 | 0 | -2.057247 | -3.507337 | -0.549085 |
| 61 | 6 | 0 | -4.320889 | -2.861515 | -2.039646 |
| 62 | 1 | 0 | -4.630978 | -1.301344 | -0.578288 |
| 63 | 6 | 0 | -2.387769 | -4.260198 | -1.674784 |
| 64 | 1 | 0 | -1.182096 | -3.766558 | 0.042578  |
| 65 | 6 | 0 | -3.515686 | -3.933324 | -2.426433 |
| 66 | 1 | 0 | -5.203412 | -2.607617 | -2.619867 |
| 67 | 1 | 0 | -1.767968 | -5.105002 | -1.961397 |
| 68 | 1 | 0 | -3.770698 | -4.515954 | -3.306843 |

---

**2(RSR)**

SCF Done: E(RM062X) = -1589.23658931

---

| Center<br>Number | Atomic<br>Number | Atomic<br>Type | Coordinates (Angstroms) |           |           |
|------------------|------------------|----------------|-------------------------|-----------|-----------|
|                  |                  |                | X                       | Y         | Z         |
| 1                | 6                | 0              | 0.990357                | 1.186964  | 1.770163  |
| 2                | 6                | 0              | -0.246926               | 1.041737  | 0.896267  |
| 3                | 1                | 0              | -0.975086               | 0.428879  | 1.431534  |
| 4                | 6                | 0              | 1.810115                | 2.314921  | 1.572867  |
| 5                | 7                | 0              | 2.477236                | 3.258906  | 1.390882  |
| 6                | 6                | 0              | -0.943502               | 2.370070  | 0.627442  |
| 7                | 6                | 0              | -1.276388               | 3.177493  | 1.725330  |
| 8                | 6                | 0              | -1.312599               | 2.811278  | -0.645118 |
| 9                | 6                | 0              | -1.959350               | 4.375846  | 1.557395  |
| 10               | 1                | 0              | -0.988203               | 2.854243  | 2.722734  |
| 11               | 6                | 0              | -1.996079               | 4.017576  | -0.819097 |
| 12               | 1                | 0              | -1.077667               | 2.228161  | -1.530210 |
| 13               | 6                | 0              | -2.323439               | 4.803761  | 0.279158  |
| 14               | 1                | 0              | -2.208383               | 4.979160  | 2.425677  |
| 15               | 1                | 0              | -2.268134               | 4.336048  | -1.821243 |
| 16               | 1                | 0              | -2.852801               | 5.742265  | 0.144512  |
| 17               | 6                | 0              | 1.590712                | 0.124483  | 2.495911  |
| 18               | 8                | 0              | 2.772356                | 0.131901  | 2.900909  |
| 19               | 6                | 0              | 0.780315                | -1.125221 | 2.767072  |
| 20               | 6                | 0              | -0.516983               | -1.093975 | 3.288969  |
| 21               | 6                | 0              | 1.389195                | -2.365180 | 2.543901  |
| 22               | 6                | 0              | -1.201832               | -2.278570 | 3.554545  |
| 23               | 1                | 0              | -0.985628               | -0.137300 | 3.507600  |



|    |   |   |           |           |           |
|----|---|---|-----------|-----------|-----------|
| 24 | 6 | 0 | 0.700929  | -3.550230 | 2.791192  |
| 25 | 1 | 0 | 2.413574  | -2.386605 | 2.181086  |
| 26 | 6 | 0 | -0.598905 | -3.508766 | 3.294924  |
| 27 | 1 | 0 | -2.205212 | -2.240096 | 3.968808  |
| 28 | 1 | 0 | 1.180993  | -4.506068 | 2.601284  |
| 29 | 1 | 0 | -1.135656 | -4.431402 | 3.495910  |
| 30 | 6 | 0 | 0.100750  | 0.213199  | -0.379985 |
| 31 | 6 | 0 | 1.157561  | 0.873540  | -1.271080 |
| 32 | 1 | 0 | 0.480291  | -0.733721 | 0.025460  |
| 33 | 1 | 0 | 1.558103  | 1.773947  | -0.801230 |
| 34 | 1 | 0 | 0.736340  | 1.141688  | -2.242499 |
| 35 | 6 | 0 | -1.110936 | -0.217702 | -1.190227 |
| 36 | 8 | 0 | -1.182353 | -0.252233 | -2.393372 |
| 37 | 8 | 0 | -2.102661 | -0.624246 | -0.366233 |
| 38 | 6 | 0 | -3.296166 | -1.085748 | -0.919527 |
| 39 | 6 | 0 | -3.692100 | -2.373109 | -0.584858 |
| 40 | 6 | 0 | -4.085289 | -0.251853 | -1.703204 |
| 41 | 6 | 0 | -4.916770 | -2.842719 | -1.055974 |
| 42 | 1 | 0 | -3.049536 | -2.984413 | 0.041240  |
| 43 | 6 | 0 | -5.303428 | -0.736794 | -2.172369 |
| 44 | 1 | 0 | -3.751831 | 0.755442  | -1.932466 |
| 45 | 6 | 0 | -5.720716 | -2.028611 | -1.851644 |
| 46 | 1 | 0 | -5.239228 | -3.846698 | -0.797835 |
| 47 | 1 | 0 | -5.930320 | -0.098478 | -2.787303 |
| 48 | 1 | 0 | -6.673222 | -2.397740 | -2.218653 |
| 49 | 6 | 0 | 4.437892  | -0.045094 | -2.946621 |

|    |   |   |          |           |           |
|----|---|---|----------|-----------|-----------|
| 50 | 6 | 0 | 3.317760 | 0.867134  | -2.402121 |
| 51 | 1 | 0 | 5.404491 | 0.448029  | -2.819196 |
| 52 | 1 | 0 | 4.287114 | -0.244040 | -4.010750 |
| 53 | 1 | 0 | 3.690734 | 1.634675  | -1.719897 |
| 54 | 1 | 0 | 2.739115 | 1.339070  | -3.198213 |
| 55 | 6 | 0 | 4.441165 | -1.058727 | -0.796639 |
| 56 | 1 | 0 | 4.605369 | -1.993394 | -0.254426 |
| 57 | 1 | 0 | 5.267319 | -0.379368 | -0.571235 |
| 58 | 6 | 0 | 3.095247 | -0.438175 | -0.353301 |
| 59 | 1 | 0 | 2.459490 | -1.173401 | 0.142818  |
| 60 | 1 | 0 | 3.219557 | 0.427040  | 0.301122  |
| 61 | 6 | 0 | 1.978635 | -1.181194 | -2.412096 |
| 62 | 1 | 0 | 1.178271 | -1.706769 | -1.889542 |
| 63 | 1 | 0 | 1.595631 | -0.794499 | -3.358726 |
| 64 | 6 | 0 | 3.234784 | -2.066127 | -2.586056 |
| 65 | 1 | 0 | 3.174612 | -2.946411 | -1.940956 |
| 66 | 1 | 0 | 3.301328 | -2.402049 | -3.623682 |
| 67 | 7 | 0 | 4.448426 | -1.325537 | -2.236486 |
| 68 | 7 | 0 | 2.360880 | 0.022231  | -1.590607 |

-----

**2(SRS)**

SCF Done: E(RM062X) = -1589.23658977

-----

| Center<br>Number | Atomic<br>Number | Atomic<br>Type | Coordinates (Angstroms) |   |   |
|------------------|------------------|----------------|-------------------------|---|---|
|                  |                  |                | X                       | Y | Z |

---

|    |   |   |           |           |           |
|----|---|---|-----------|-----------|-----------|
| 1  | 6 | 0 | -0.990114 | 1.185966  | 1.770974  |
| 2  | 6 | 0 | 0.247191  | 1.040713  | 0.897112  |
| 3  | 1 | 0 | 0.975066  | 0.427246  | 1.432068  |
| 4  | 6 | 0 | -1.809239 | 2.314499  | 1.574381  |
| 5  | 7 | 0 | -2.475774 | 3.259027  | 1.393068  |
| 6  | 6 | 0 | 0.944292  | 2.368923  | 0.629059  |
| 7  | 6 | 0 | 1.277535  | 3.175562  | 1.727422  |
| 8  | 6 | 0 | 1.313440  | 2.810778  | -0.643253 |
| 9  | 6 | 0 | 1.960897  | 4.373780  | 1.560169  |
| 10 | 1 | 0 | 0.989282  | 2.851816  | 2.724646  |
| 11 | 6 | 0 | 1.997330  | 4.016946  | -0.816546 |
| 12 | 1 | 0 | 1.078245  | 2.228276  | -1.528678 |
| 13 | 6 | 0 | 2.325041  | 4.802352  | 0.282161  |
| 14 | 1 | 0 | 2.210184  | 4.976481  | 2.428802  |
| 15 | 1 | 0 | 2.269401  | 4.335932  | -1.818523 |
| 16 | 1 | 0 | 2.854699  | 5.740764  | 0.148041  |
| 17 | 6 | 0 | -1.591082 | 0.123228  | 2.495839  |
| 18 | 8 | 0 | -2.772809 | 0.130835  | 2.900598  |
| 19 | 6 | 0 | -0.781241 | -1.126992 | 2.766268  |
| 20 | 6 | 0 | -1.390573 | -2.366549 | 2.542106  |
| 21 | 6 | 0 | 0.515983  | -1.096633 | 3.288399  |
| 22 | 6 | 0 | -0.702821 | -3.552050 | 2.788676  |
| 23 | 1 | 0 | -2.414902 | -2.387307 | 2.179118  |
| 24 | 6 | 0 | 1.200311  | -2.281687 | 3.553259  |
| 25 | 1 | 0 | 0.984974  | -0.140297 | 3.507767  |

|    |   |   |           |           |           |
|----|---|---|-----------|-----------|-----------|
| 26 | 6 | 0 | 0.596939  | -3.511461 | 3.292659  |
| 27 | 1 | 0 | -1.183237 | -4.507562 | 2.598020  |
| 28 | 1 | 0 | 2.203636  | -2.243901 | 3.967712  |
| 29 | 1 | 0 | 1.133283  | -4.434454 | 3.493090  |
| 30 | 6 | 0 | -0.100755 | 0.213105  | -0.379688 |
| 31 | 6 | 0 | -1.157239 | 0.874513  | -1.270364 |
| 32 | 1 | 0 | -0.480622 | -0.733952 | 0.025124  |
| 33 | 1 | 0 | -1.557502 | 1.774707  | -0.799871 |
| 34 | 1 | 0 | -0.735795 | 1.143251  | -2.241519 |
| 35 | 6 | 0 | 1.110852  | -0.217526 | -1.190177 |
| 36 | 8 | 0 | 1.182449  | -0.250874 | -2.393344 |
| 37 | 8 | 0 | 2.102331  | -0.625181 | -0.366426 |
| 38 | 6 | 0 | 3.296029  | -1.085887 | -0.919967 |
| 39 | 6 | 0 | 4.085241  | -0.250916 | -1.702416 |
| 40 | 6 | 0 | 3.692087  | -2.373577 | -0.586718 |
| 41 | 6 | 0 | 5.303578  | -0.735084 | -2.171839 |
| 42 | 1 | 0 | 3.751687  | 0.756610  | -1.930517 |
| 43 | 6 | 0 | 4.916962  | -2.842416 | -1.058081 |
| 44 | 1 | 0 | 3.049465  | -2.985725 | 0.038499  |
| 45 | 6 | 0 | 5.720985  | -2.027223 | -1.852561 |
| 46 | 1 | 0 | 5.930547  | -0.095912 | -2.785807 |
| 47 | 1 | 0 | 5.239529  | -3.846647 | -0.801067 |
| 48 | 1 | 0 | 6.673655  | -2.395752 | -2.219750 |
| 49 | 6 | 0 | -3.317262 | 0.869666  | -2.401743 |
| 50 | 6 | 0 | -4.437583 | -0.041811 | -2.947086 |
| 51 | 1 | 0 | -3.690113 | 1.636810  | -1.719009 |

|    |   |   |           |           |           |
|----|---|---|-----------|-----------|-----------|
| 52 | 1 | 0 | -2.738339 | 1.342014  | -3.197383 |
| 53 | 1 | 0 | -5.404035 | 0.451575  | -2.819581 |
| 54 | 1 | 0 | -4.286616 | -0.240125 | -4.011304 |
| 55 | 6 | 0 | -3.095490 | -0.437175 | -0.353803 |
| 56 | 1 | 0 | -2.460062 | -1.173028 | 0.141796  |
| 57 | 1 | 0 | -3.219511 | 0.427589  | 0.301271  |
| 58 | 6 | 0 | -4.441584 | -1.056861 | -0.797761 |
| 59 | 1 | 0 | -4.606296 | -1.991792 | -0.256159 |
| 60 | 1 | 0 | -5.267481 | -0.377288 | -0.572070 |
| 61 | 6 | 0 | -3.235260 | -2.063515 | -2.587650 |
| 62 | 1 | 0 | -3.175463 | -2.944196 | -1.943059 |
| 63 | 1 | 0 | -3.301761 | -2.398811 | -3.625478 |
| 64 | 6 | 0 | -1.978847 | -1.179101 | -2.412981 |
| 65 | 1 | 0 | -1.178691 | -1.705300 | -1.890738 |
| 66 | 1 | 0 | -1.595652 | -0.791844 | -3.359304 |
| 67 | 7 | 0 | -2.360794 | 0.023871  | -1.590684 |
| 68 | 7 | 0 | -4.448712 | -1.322729 | -2.237794 |

-----

**2(SSR)**

SCF Done: E(RM062X) = -1589.23576710

-----

| Center<br>Number | Atomic<br>Number | Atomic<br>Type | Coordinates (Angstroms) |          |           |
|------------------|------------------|----------------|-------------------------|----------|-----------|
|                  |                  |                | X                       | Y        | Z         |
| 1                | 6                | 0              | -0.465811               | 0.218742 | -0.175790 |

-----

|    |   |   |           |           |           |
|----|---|---|-----------|-----------|-----------|
| 2  | 6 | 0 | -1.856232 | 0.269417  | -0.798732 |
| 3  | 1 | 0 | -0.514939 | -0.113292 | 0.864983  |
| 4  | 1 | 0 | -2.360418 | 1.202389  | -0.531310 |
| 5  | 1 | 0 | -1.791740 | 0.204670  | -1.888298 |
| 6  | 6 | 0 | 0.457368  | -0.748365 | -0.889319 |
| 7  | 8 | 0 | 0.531091  | -0.911109 | -2.082696 |
| 8  | 8 | 0 | 1.216173  | -1.417311 | 0.006019  |
| 9  | 6 | 0 | 2.254295  | -2.219091 | -0.473094 |
| 10 | 6 | 0 | 3.551376  | -1.812448 | -0.189656 |
| 11 | 6 | 0 | 1.974630  | -3.402369 | -1.144738 |
| 12 | 6 | 0 | 4.604763  | -2.629147 | -0.599726 |
| 13 | 1 | 0 | 3.711277  | -0.877410 | 0.346428  |
| 14 | 6 | 0 | 3.038827  | -4.204372 | -1.550249 |
| 15 | 1 | 0 | 0.945304  | -3.686392 | -1.341526 |
| 16 | 6 | 0 | 4.351902  | -3.819627 | -1.279439 |
| 17 | 1 | 0 | 5.626968  | -2.331914 | -0.385138 |
| 18 | 1 | 0 | 2.839213  | -5.132634 | -2.076921 |
| 19 | 1 | 0 | 5.177578  | -4.449842 | -1.595477 |
| 20 | 6 | 0 | -4.031291 | -0.759256 | -1.236009 |
| 21 | 6 | 0 | -5.091026 | -1.722245 | -0.656270 |
| 22 | 1 | 0 | -4.362800 | 0.280477  | -1.237200 |
| 23 | 1 | 0 | -3.710933 | -1.040276 | -2.241655 |
| 24 | 1 | 0 | -5.872041 | -1.165191 | -0.132575 |
| 25 | 1 | 0 | -5.554395 | -2.285429 | -1.469896 |
| 26 | 6 | 0 | -3.232639 | -0.655975 | 1.066572  |
| 27 | 1 | 0 | -2.343612 | -0.528194 | 1.685272  |

|    |   |   |           |           |           |
|----|---|---|-----------|-----------|-----------|
| 28 | 1 | 0 | -3.824170 | 0.261694  | 1.091016  |
| 29 | 6 | 0 | -4.049340 | -1.903187 | 1.475308  |
| 30 | 1 | 0 | -3.447829 | -2.565404 | 2.103146  |
| 31 | 1 | 0 | -4.927879 | -1.590537 | 2.044548  |
| 32 | 6 | 0 | -3.298772 | -3.252869 | -0.336236 |
| 33 | 1 | 0 | -2.922531 | -4.061990 | 0.294069  |
| 34 | 1 | 0 | -3.600353 | -3.674248 | -1.298531 |
| 35 | 6 | 0 | -2.185032 | -2.198011 | -0.534794 |
| 36 | 1 | 0 | -1.399107 | -2.291092 | 0.219072  |
| 37 | 1 | 0 | -1.748701 | -2.235764 | -1.535117 |
| 38 | 7 | 0 | -2.795570 | -0.829524 | -0.367676 |
| 39 | 7 | 0 | -4.476485 | -2.653792 | 0.292364  |
| 40 | 6 | 0 | 1.663524  | 1.603950  | 0.200526  |
| 41 | 6 | 0 | 0.173673  | 1.660964  | -0.099370 |
| 42 | 1 | 0 | -0.331592 | 2.101387  | 0.763237  |
| 43 | 6 | 0 | 2.563012  | 1.550027  | -0.883585 |
| 44 | 7 | 0 | 3.304415  | 1.518891  | -1.787194 |
| 45 | 6 | 0 | -0.150444 | 2.580599  | -1.268943 |
| 46 | 6 | 0 | 0.026629  | 2.217404  | -2.609297 |
| 47 | 6 | 0 | -0.614278 | 3.870195  | -0.986159 |
| 48 | 6 | 0 | -0.256977 | 3.121002  | -3.632895 |
| 49 | 1 | 0 | 0.380237  | 1.221554  | -2.858328 |
| 50 | 6 | 0 | -0.892100 | 4.776676  | -2.006473 |
| 51 | 1 | 0 | -0.757936 | 4.166388  | 0.050954  |
| 52 | 6 | 0 | -0.714745 | 4.403056  | -3.337156 |
| 53 | 1 | 0 | -0.116566 | 2.818883  | -4.666978 |

|    |   |   |           |           |           |
|----|---|---|-----------|-----------|-----------|
| 54 | 1 | 0 | -1.250389 | 5.772335  | -1.760828 |
| 55 | 1 | 0 | -0.932568 | 5.104620  | -4.137139 |
| 56 | 6 | 0 | 2.211710  | 1.266314  | 1.461371  |
| 57 | 8 | 0 | 3.405865  | 0.947896  | 1.658123  |
| 58 | 6 | 0 | 1.300095  | 1.264124  | 2.668821  |
| 59 | 6 | 0 | 0.550141  | 2.382242  | 3.046950  |
| 60 | 6 | 0 | 1.261716  | 0.117927  | 3.469365  |
| 61 | 6 | 0 | -0.237714 | 2.349537  | 4.196539  |
| 62 | 1 | 0 | 0.595677  | 3.286212  | 2.443621  |
| 63 | 6 | 0 | 0.461084  | 0.076733  | 4.608374  |
| 64 | 1 | 0 | 1.864555  | -0.741040 | 3.186391  |
| 65 | 6 | 0 | -0.290625 | 1.193843  | 4.974463  |
| 66 | 1 | 0 | -0.808232 | 3.227527  | 4.485626  |
| 67 | 1 | 0 | 0.429132  | -0.823431 | 5.215568  |
| 68 | 1 | 0 | -0.909090 | 1.166361  | 5.866806  |

-----

**TS2/3(RRS)**

SCF Done: E(RM062X) = -1589.16689676

Imaginary Frequencies = -1703.7458

-----

| Center<br>Number | Atomic<br>Number | Atomic<br>Type | Coordinates (Angstroms) |           |          |
|------------------|------------------|----------------|-------------------------|-----------|----------|
|                  |                  |                | X                       | Y         | Z        |
| 1                | 6                | 0              | 0.079392                | -1.056014 | 0.535137 |
| 2                | 6                | 0              | -0.670432               | -2.231034 | 1.087785 |



|    |   |   |           |           |           |
|----|---|---|-----------|-----------|-----------|
| 3  | 1 | 0 | -0.508893 | 0.124162  | -0.206474 |
| 4  | 1 | 0 | -0.930026 | -2.083886 | 2.140419  |
| 5  | 1 | 0 | -0.105138 | -3.162521 | 0.983177  |
| 6  | 6 | 0 | 1.152112  | -1.444738 | -0.354130 |
| 7  | 8 | 0 | 1.297423  | -2.525746 | -0.903697 |
| 8  | 8 | 0 | 2.011335  | -0.398405 | -0.603450 |
| 9  | 6 | 0 | 3.059208  | -0.596630 | -1.482121 |
| 10 | 6 | 0 | 3.052130  | 0.107470  | -2.680772 |
| 11 | 6 | 0 | 4.123443  | -1.425020 | -1.136647 |
| 12 | 6 | 0 | 4.134217  | -0.019942 | -3.549940 |
| 13 | 1 | 0 | 2.210016  | 0.751779  | -2.912128 |
| 14 | 6 | 0 | 5.196485  | -1.549458 | -2.015188 |
| 15 | 1 | 0 | 4.101639  | -1.957708 | -0.190839 |
| 16 | 6 | 0 | 5.205430  | -0.848723 | -3.221612 |
| 17 | 1 | 0 | 4.137193  | 0.531281  | -4.485504 |
| 18 | 1 | 0 | 6.030864  | -2.193453 | -1.753565 |
| 19 | 1 | 0 | 6.046031  | -0.946548 | -3.901672 |
| 20 | 6 | 0 | -3.970015 | -4.049803 | 0.430300  |
| 21 | 6 | 0 | -2.532317 | -3.840193 | 0.959033  |
| 22 | 1 | 0 | -4.700812 | -3.861911 | 1.221251  |
| 23 | 1 | 0 | -4.088815 | -5.081068 | 0.088843  |
| 24 | 1 | 0 | -2.490953 | -3.769435 | 2.047644  |
| 25 | 1 | 0 | -1.843794 | -4.618204 | 0.621487  |
| 26 | 6 | 0 | -4.280229 | -1.766693 | -0.163974 |
| 27 | 1 | 0 | -4.342740 | -1.082695 | -1.014990 |
| 28 | 1 | 0 | -5.172869 | -1.631807 | 0.452322  |

|    |   |   |           |           |           |
|----|---|---|-----------|-----------|-----------|
| 29 | 6 | 0 | -3.017799 | -1.469042 | 0.677565  |
| 30 | 1 | 0 | -2.560554 | -0.513070 | 0.423122  |
| 31 | 1 | 0 | -3.211363 | -1.490927 | 1.753015  |
| 32 | 6 | 0 | -1.840799 | -2.695893 | -1.078863 |
| 33 | 1 | 0 | -1.592571 | -1.704862 | -1.462828 |
| 34 | 1 | 0 | -0.990614 | -3.359901 | -1.239246 |
| 35 | 6 | 0 | -3.164919 | -3.244556 | -1.659029 |
| 36 | 1 | 0 | -3.434235 | -2.681461 | -2.556008 |
| 37 | 1 | 0 | -3.055958 | -4.297375 | -1.933231 |
| 38 | 7 | 0 | -4.250957 | -3.137342 | -0.680606 |
| 39 | 7 | 0 | -2.006049 | -2.543155 | 0.408452  |
| 40 | 6 | 0 | -0.224662 | 1.322090  | 0.432141  |
| 41 | 6 | 0 | 0.231576  | 0.205648  | 1.411360  |
| 42 | 1 | 0 | -0.588671 | 0.161774  | 2.138011  |
| 43 | 6 | 0 | 0.764210  | 2.055701  | -0.294728 |
| 44 | 7 | 0 | 1.561374  | 2.653232  | -0.894729 |
| 45 | 6 | 0 | 1.520286  | 0.422015  | 2.175639  |
| 46 | 6 | 0 | 1.887361  | 1.701579  | 2.605092  |
| 47 | 6 | 0 | 2.337203  | -0.657751 | 2.525995  |
| 48 | 6 | 0 | 3.042129  | 1.898482  | 3.359748  |
| 49 | 1 | 0 | 1.262052  | 2.553714  | 2.347811  |
| 50 | 6 | 0 | 3.491417  | -0.464971 | 3.281801  |
| 51 | 1 | 0 | 2.067375  | -1.661131 | 2.202369  |
| 52 | 6 | 0 | 3.850302  | 0.815446  | 3.700245  |
| 53 | 1 | 0 | 3.311053  | 2.901236  | 3.679548  |
| 54 | 1 | 0 | 4.112392  | -1.317686 | 3.541794  |

|    |   |   |           |          |           |
|----|---|---|-----------|----------|-----------|
| 55 | 1 | 0 | 4.753448  | 0.968327 | 4.283794  |
| 56 | 6 | 0 | -1.506871 | 1.975274 | 0.731920  |
| 57 | 8 | 0 | -2.272438 | 1.513152 | 1.578470  |
| 58 | 6 | 0 | -1.996521 | 3.123495 | -0.110114 |
| 59 | 6 | 0 | -3.298607 | 3.030176 | -0.614913 |
| 60 | 6 | 0 | -1.253086 | 4.284580 | -0.339479 |
| 61 | 6 | 0 | -3.835732 | 4.063189 | -1.374974 |
| 62 | 1 | 0 | -3.881431 | 2.136478 | -0.409183 |
| 63 | 6 | 0 | -1.802549 | 5.329452 | -1.080959 |
| 64 | 1 | 0 | -0.255430 | 4.386421 | 0.074528  |
| 65 | 6 | 0 | -3.086877 | 5.216520 | -1.608913 |
| 66 | 1 | 0 | -4.839653 | 3.973180 | -1.779175 |
| 67 | 1 | 0 | -1.224533 | 6.234048 | -1.245411 |
| 68 | 1 | 0 | -3.507057 | 6.028170 | -2.195717 |

-----

**TS2/3(RSR)**

SCF Done: E(RM062X) = -1589.15842523

Imaginary Frequencies = -1719.8831

-----

| Center<br>Number | Atomic<br>Number | Atomic<br>Type | Coordinates (Angstroms) |           |           |
|------------------|------------------|----------------|-------------------------|-----------|-----------|
|                  |                  |                | X                       | Y         | Z         |
| 1                | 6                | 0              | -0.019194               | -1.564146 | -1.145040 |
| 2                | 6                | 0              | -0.205968               | -1.190748 | 0.346251  |
| 3                | 1                | 0              | -1.244165               | -0.872096 | 0.438720  |

|    |   |   |           |           |           |
|----|---|---|-----------|-----------|-----------|
| 4  | 6 | 0 | 1.200774  | -2.234190 | -1.486763 |
| 5  | 7 | 0 | 2.224681  | -2.727031 | -1.735734 |
| 6  | 6 | 0 | 0.052478  | -2.253429 | 1.392890  |
| 7  | 6 | 0 | 0.040711  | -3.615918 | 1.081187  |
| 8  | 6 | 0 | 0.262542  | -1.872518 | 2.724318  |
| 9  | 6 | 0 | 0.232393  | -4.575967 | 2.075733  |
| 10 | 1 | 0 | -0.125435 | -3.934098 | 0.054670  |
| 11 | 6 | 0 | 0.451924  | -2.828306 | 3.718102  |
| 12 | 1 | 0 | 0.273153  | -0.814177 | 2.978063  |
| 13 | 6 | 0 | 0.439557  | -4.185927 | 3.395755  |
| 14 | 1 | 0 | 0.220405  | -5.630055 | 1.813733  |
| 15 | 1 | 0 | 0.611713  | -2.513872 | 4.745597  |
| 16 | 1 | 0 | 0.590962  | -4.932791 | 4.169326  |
| 17 | 6 | 0 | -1.091145 | -1.750908 | -2.136850 |
| 18 | 8 | 0 | -0.830872 | -2.017724 | -3.307074 |
| 19 | 6 | 0 | -2.522220 | -1.495200 | -1.752361 |
| 20 | 6 | 0 | -3.102061 | -2.046853 | -0.605702 |
| 21 | 6 | 0 | -3.311807 | -0.745667 | -2.630299 |
| 22 | 6 | 0 | -4.450346 | -1.830190 | -0.329619 |
| 23 | 1 | 0 | -2.506033 | -2.664650 | 0.062320  |
| 24 | 6 | 0 | -4.653820 | -0.512730 | -2.343340 |
| 25 | 1 | 0 | -2.861828 | -0.344590 | -3.533899 |
| 26 | 6 | 0 | -5.223763 | -1.053375 | -1.190408 |
| 27 | 1 | 0 | -4.896078 | -2.268965 | 0.557956  |
| 28 | 1 | 0 | -5.257031 | 0.085666  | -3.019783 |
| 29 | 1 | 0 | -6.271575 | -0.874909 | -0.967505 |

|    |   |   |           |           |           |
|----|---|---|-----------|-----------|-----------|
| 30 | 6 | 0 | 0.629435  | 0.108660  | 0.417823  |
| 31 | 6 | 0 | 2.082976  | -0.068410 | 0.773652  |
| 32 | 1 | 0 | 0.387060  | -0.257177 | -1.022310 |
| 33 | 1 | 0 | 2.345608  | -1.120657 | 0.642890  |
| 34 | 1 | 0 | 2.313649  | 0.197342  | 1.811433  |
| 35 | 6 | 0 | 0.003711  | 1.349297  | 0.770307  |
| 36 | 8 | 0 | 0.561323  | 2.424388  | 0.957311  |
| 37 | 8 | 0 | -1.378253 | 1.261961  | 0.772321  |
| 38 | 6 | 0 | -2.144677 | 2.404574  | 0.876360  |
| 39 | 6 | 0 | -3.128788 | 2.580670  | -0.092434 |
| 40 | 6 | 0 | -2.015493 | 3.295805  | 1.939377  |
| 41 | 6 | 0 | -3.993573 | 3.668429  | -0.001915 |
| 42 | 1 | 0 | -3.207694 | 1.859191  | -0.900670 |
| 43 | 6 | 0 | -2.881660 | 4.384222  | 2.014488  |
| 44 | 1 | 0 | -1.249398 | 3.135486  | 2.688943  |
| 45 | 6 | 0 | -3.869832 | 4.575713  | 1.048684  |
| 46 | 1 | 0 | -4.763309 | 3.804661  | -0.755592 |
| 47 | 1 | 0 | -2.784706 | 5.085341  | 2.838185  |
| 48 | 1 | 0 | -4.542021 | 5.425370  | 1.117818  |
| 49 | 6 | 0 | 5.515626  | 0.641357  | -0.779324 |
| 50 | 6 | 0 | 4.349657  | -0.195477 | -0.204682 |
| 51 | 1 | 0 | 6.008660  | 0.080494  | -1.577263 |
| 52 | 1 | 0 | 6.253668  | 0.854946  | -0.001602 |
| 53 | 1 | 0 | 4.037597  | -1.004560 | -0.870420 |
| 54 | 1 | 0 | 4.579531  | -0.607609 | 0.780165  |
| 55 | 6 | 0 | 3.896862  | 1.644592  | -2.200425 |

|    |   |   |          |          |           |
|----|---|---|----------|----------|-----------|
| 56 | 1 | 0 | 3.615083 | 2.565683 | -2.716772 |
| 57 | 1 | 0 | 4.215685 | 0.914413 | -2.949190 |
| 58 | 6 | 0 | 2.680393 | 1.106056 | -1.409283 |
| 59 | 1 | 0 | 1.902239 | 1.856557 | -1.261340 |
| 60 | 1 | 0 | 2.253311 | 0.224496 | -1.888422 |
| 61 | 6 | 0 | 3.598968 | 1.930846 | 0.707863  |
| 62 | 1 | 0 | 2.700431 | 2.478738 | 0.986356  |
| 63 | 1 | 0 | 4.101161 | 1.563110 | 1.605777  |
| 64 | 6 | 0 | 4.550129 | 2.738492 | -0.200087 |
| 65 | 1 | 0 | 4.037709 | 3.609878 | -0.617552 |
| 66 | 1 | 0 | 5.403638 | 3.089058 | 0.386074  |
| 67 | 7 | 0 | 5.029219 | 1.915540 | -1.313354 |
| 68 | 7 | 0 | 3.145771 | 0.698386 | -0.039730 |

-----

**TS2/3(SRS)**

SCF Done: E(RM062X) = -1589.15842532

Imaginary Frequencies = -1719.8481

-----

| Center<br>Number | Atomic<br>Number | Atomic<br>Type | Coordinates (Angstroms) |           |           |
|------------------|------------------|----------------|-------------------------|-----------|-----------|
|                  |                  |                | X                       | Y         | Z         |
| 1                | 6                | 0              | 0.019154                | -1.564040 | -1.145140 |
| 2                | 6                | 0              | 0.205927                | -1.190702 | 0.346167  |
| 3                | 1                | 0              | 1.244117                | -0.872030 | 0.438648  |
| 4                | 6                | 0              | -1.200819               | -2.234047 | -1.486917 |

|    |   |   |           |           |           |
|----|---|---|-----------|-----------|-----------|
| 5  | 7 | 0 | -2.224743 | -2.726837 | -1.735922 |
| 6  | 6 | 0 | -0.052495 | -2.253416 | 1.392778  |
| 7  | 6 | 0 | -0.041038 | -3.615891 | 1.081009  |
| 8  | 6 | 0 | -0.262207 | -1.872532 | 2.724270  |
| 9  | 6 | 0 | -0.232670 | -4.575951 | 2.075556  |
| 10 | 1 | 0 | 0.124838  | -3.934069 | 0.054450  |
| 11 | 6 | 0 | -0.451522 | -2.828330 | 3.718055  |
| 12 | 1 | 0 | -0.272602 | -0.814199 | 2.978063  |
| 13 | 6 | 0 | -0.439463 | -4.185940 | 3.395643  |
| 14 | 1 | 0 | -0.220919 | -5.630029 | 1.813503  |
| 15 | 1 | 0 | -0.611022 | -2.513914 | 4.745600  |
| 16 | 1 | 0 | -0.590806 | -4.932813 | 4.169217  |
| 17 | 6 | 0 | 1.091131  | -1.750718 | -2.136944 |
| 18 | 8 | 0 | 0.830888  | -2.017354 | -3.307213 |
| 19 | 6 | 0 | 2.522200  | -1.495138 | -1.752356 |
| 20 | 6 | 0 | 3.311794  | -0.745370 | -2.630089 |
| 21 | 6 | 0 | 3.102019  | -2.047077 | -0.605826 |
| 22 | 6 | 0 | 4.653793  | -0.512478 | -2.343043 |
| 23 | 1 | 0 | 2.861821  | -0.344072 | -3.533594 |
| 24 | 6 | 0 | 4.450300  | -1.830472 | -0.329670 |
| 25 | 1 | 0 | 2.505985  | -2.665054 | 0.062024  |
| 26 | 6 | 0 | 5.223723  | -1.053416 | -1.190242 |
| 27 | 1 | 0 | 5.257004  | 0.086103  | -3.019321 |
| 28 | 1 | 0 | 4.896031  | -2.269462 | 0.557800  |
| 29 | 1 | 0 | 6.271526  | -0.874984 | -0.967270 |
| 30 | 6 | 0 | -0.629488 | 0.108697  | 0.417802  |

|    |   |   |           |           |           |
|----|---|---|-----------|-----------|-----------|
| 31 | 6 | 0 | -2.083020 | -0.068457 | 0.773624  |
| 32 | 1 | 0 | -0.387134 | -0.257105 | -1.022371 |
| 33 | 1 | 0 | -2.345576 | -1.120699 | 0.642644  |
| 34 | 1 | 0 | -2.313738 | 0.197070  | 1.811457  |
| 35 | 6 | 0 | -0.003744 | 1.349335  | 0.770222  |
| 36 | 8 | 0 | -0.561327 | 2.424454  | 0.957160  |
| 37 | 8 | 0 | 1.378218  | 1.261955  | 0.772252  |
| 38 | 6 | 0 | 2.144759  | 2.404486  | 0.876281  |
| 39 | 6 | 0 | 2.015507  | 3.295893  | 1.939146  |
| 40 | 6 | 0 | 3.129082  | 2.580298  | -0.092347 |
| 41 | 6 | 0 | 2.881843  | 4.384175  | 2.014279  |
| 42 | 1 | 0 | 1.249219  | 3.135819  | 2.688569  |
| 43 | 6 | 0 | 3.994037  | 3.667919  | -0.001799 |
| 44 | 1 | 0 | 3.208021  | 1.858694  | -0.900472 |
| 45 | 6 | 0 | 3.870249  | 4.575361  | 1.048660  |
| 46 | 1 | 0 | 2.784851  | 5.085411  | 2.837873  |
| 47 | 1 | 0 | 4.763964  | 3.803905  | -0.755329 |
| 48 | 1 | 0 | 4.542582  | 5.424901  | 1.117826  |
| 49 | 6 | 0 | -4.349850 | -0.195379 | -0.204305 |
| 50 | 6 | 0 | -5.515857 | 0.641539  | -0.778742 |
| 51 | 1 | 0 | -4.037988 | -1.004510 | -0.870083 |
| 52 | 1 | 0 | -4.579558 | -0.607457 | 0.780604  |
| 53 | 1 | 0 | -6.009195 | 0.080626  | -1.576458 |
| 54 | 1 | 0 | -6.253650 | 0.855356  | -0.000846 |
| 55 | 6 | 0 | -2.680654 | 1.105933  | -1.409284 |
| 56 | 1 | 0 | -1.902574 | 1.856546  | -1.261487 |



|    |   |   |           |          |           |
|----|---|---|-----------|----------|-----------|
| 57 | 1 | 0 | -2.253507 | 0.224380 | -1.888374 |
| 58 | 6 | 0 | -3.897254 | 1.644257 | -2.200351 |
| 59 | 1 | 0 | -3.615527 | 2.565135 | -2.717108 |
| 60 | 1 | 0 | -4.216297 | 0.913820 | -2.948770 |
| 61 | 6 | 0 | -4.549927 | 2.738651 | -0.200084 |
| 62 | 1 | 0 | -4.037302 | 3.609778 | -0.617843 |
| 63 | 1 | 0 | -5.403240 | 3.089632 | 0.386117  |
| 64 | 6 | 0 | -3.598873 | 1.930950 | 0.707919  |
| 65 | 1 | 0 | -2.700281 | 2.478753 | 0.986408  |
| 66 | 1 | 0 | -4.101137 | 1.563304 | 1.605832  |
| 67 | 7 | 0 | -3.145852 | 0.698393 | -0.039625 |
| 68 | 7 | 0 | -5.029398 | 1.915569 | -1.313103 |

-----

**TS2/3(SSR)**

SCF Done: E(RM062X) = -1589.16019036

Imaginary Frequencies = -1709.4006

-----

| Center<br>Number | Atomic<br>Number | Atomic<br>Type | Coordinates (Angstroms) |          |           |
|------------------|------------------|----------------|-------------------------|----------|-----------|
|                  |                  |                | X                       | Y        | Z         |
| 1                | 6                | 0              | -0.230067               | 0.568711 | -0.448466 |
| 2                | 6                | 0              | 0.665992                | 1.193863 | -1.477054 |
| 3                | 1                | 0              | 0.145560                | 0.332001 | 0.991097  |
| 4                | 1                | 0              | 1.164381                | 0.435768 | -2.089644 |
| 5                | 1                | 0              | 0.122668                | 1.884487 | -2.128289 |

|    |   |   |           |          |           |
|----|---|---|-----------|----------|-----------|
| 6  | 6 | 0 | -1.516079 | 1.221414 | -0.366806 |
| 7  | 8 | 0 | -1.788719 | 2.349674 | -0.744899 |
| 8  | 8 | 0 | -2.444638 | 0.440923 | 0.283106  |
| 9  | 6 | 0 | -3.745307 | 0.892490 | 0.402739  |
| 10 | 6 | 0 | -4.281675 | 0.998412 | 1.681286  |
| 11 | 6 | 0 | -4.517577 | 1.146998 | -0.728293 |
| 12 | 6 | 0 | -5.617613 | 1.369109 | 1.828491  |
| 13 | 1 | 0 | -3.653707 | 0.776480 | 2.538068  |
| 14 | 6 | 0 | -5.847684 | 1.524172 | -0.567757 |
| 15 | 1 | 0 | -4.075531 | 1.048171 | -1.714331 |
| 16 | 6 | 0 | -6.401530 | 1.636066 | 0.708146  |
| 17 | 1 | 0 | -6.043576 | 1.450074 | 2.824158  |
| 18 | 1 | 0 | -6.454594 | 1.728601 | -1.444877 |
| 19 | 1 | 0 | -7.440851 | 1.926882 | 0.826565  |
| 20 | 6 | 0 | 2.580577  | 2.621844 | -2.074483 |
| 21 | 6 | 0 | 3.812212  | 3.377368 | -1.519958 |
| 22 | 1 | 0 | 2.856542  | 1.788591 | -2.723528 |
| 23 | 1 | 0 | 1.888421  | 3.278591 | -2.606081 |
| 24 | 1 | 0 | 4.732720  | 2.850571 | -1.784338 |
| 25 | 1 | 0 | 3.854068  | 4.381606 | -1.948514 |
| 26 | 6 | 0 | 2.741586  | 1.213722 | -0.085653 |
| 27 | 1 | 0 | 2.139923  | 0.743242 | 0.691671  |
| 28 | 1 | 0 | 3.150348  | 0.442944 | -0.745257 |
| 29 | 6 | 0 | 3.828045  | 2.140488 | 0.512792  |
| 30 | 1 | 0 | 3.699386  | 2.222495 | 1.595301  |
| 31 | 1 | 0 | 4.819439  | 1.726043 | 0.313088  |

|    |   |   |           |           |           |
|----|---|---|-----------|-----------|-----------|
| 32 | 6 | 0 | 2.463609  | 4.084641  | 0.312419  |
| 33 | 1 | 0 | 2.454813  | 4.253822  | 1.391914  |
| 34 | 1 | 0 | 2.381000  | 5.052739  | -0.188294 |
| 35 | 6 | 0 | 1.277178  | 3.172409  | -0.085275 |
| 36 | 1 | 0 | 0.785414  | 2.715257  | 0.775151  |
| 37 | 1 | 0 | 0.526300  | 3.684415  | -0.689405 |
| 38 | 7 | 0 | 1.808984  | 2.041123  | -0.920920 |
| 39 | 7 | 0 | 3.745834  | 3.483550  | -0.061889 |
| 40 | 6 | 0 | 0.043946  | -1.020876 | 1.338512  |
| 41 | 6 | 0 | -0.071409 | -0.955310 | -0.206384 |
| 42 | 1 | 0 | 0.951841  | -1.137163 | -0.541073 |
| 43 | 6 | 0 | -1.114375 | -1.137385 | 2.174897  |
| 44 | 7 | 0 | -2.016450 | -1.246738 | 2.900519  |
| 45 | 6 | 0 | -0.945347 | -1.920929 | -0.984181 |
| 46 | 6 | 0 | -2.199421 | -2.369124 | -0.551933 |
| 47 | 6 | 0 | -0.471392 | -2.377173 | -2.222137 |
| 48 | 6 | 0 | -2.954391 | -3.236707 | -1.339146 |
| 49 | 1 | 0 | -2.594989 | -2.039040 | 0.401777  |
| 50 | 6 | 0 | -1.227797 | -3.238108 | -3.014148 |
| 51 | 1 | 0 | 0.510696  | -2.054964 | -2.564239 |
| 52 | 6 | 0 | -2.476925 | -3.671096 | -2.574204 |
| 53 | 1 | 0 | -3.923213 | -3.574746 | -0.982256 |
| 54 | 1 | 0 | -0.837077 | -3.576974 | -3.969449 |
| 55 | 1 | 0 | -3.070119 | -4.345584 | -3.184693 |
| 56 | 6 | 0 | 1.247695  | -1.517565 | 2.042247  |
| 57 | 8 | 0 | 1.326262  | -1.479595 | 3.267002  |

|    |   |   |          |           |           |
|----|---|---|----------|-----------|-----------|
| 58 | 6 | 0 | 2.452706 | -1.988904 | 1.269934  |
| 59 | 6 | 0 | 2.365284 | -2.920740 | 0.232003  |
| 60 | 6 | 0 | 3.708912 | -1.524095 | 1.673126  |
| 61 | 6 | 0 | 3.520177 | -3.365334 | -0.408852 |
| 62 | 1 | 0 | 1.395281 | -3.309985 | -0.069010 |
| 63 | 6 | 0 | 4.860080 | -1.949931 | 1.017267  |
| 64 | 1 | 0 | 3.770022 | -0.819897 | 2.498678  |
| 65 | 6 | 0 | 4.766278 | -2.871757 | -0.026106 |
| 66 | 1 | 0 | 3.444410 | -4.097311 | -1.207468 |
| 67 | 1 | 0 | 5.830342 | -1.571012 | 1.324706  |
| 68 | 1 | 0 | 5.664145 | -3.209700 | -0.535216 |

-----

**3(RRS)**

SCF Done: E(RM062X) = -1589.22349698

-----

| Center<br>Number | Atomic<br>Number | Atomic<br>Type | Coordinates (Angstroms) |           |           |
|------------------|------------------|----------------|-------------------------|-----------|-----------|
|                  |                  |                | X                       | Y         | Z         |
| 1                | 6                | 0              | -0.266485               | 0.004188  | -0.826240 |
| 2                | 6                | 0              | 0.625705                | -0.025818 | -2.009416 |
| 3                | 1                | 0              | -2.113352               | 0.932574  | 1.214949  |
| 4                | 1                | 0              | 0.761943                | 0.963469  | -2.463388 |
| 5                | 1                | 0              | 0.252154                | -0.723859 | -2.763933 |
| 6                | 6                | 0              | -1.081059               | -1.129801 | -0.721279 |
| 7                | 8                | 0              | -0.942662               | -2.217313 | -1.293443 |

|    |   |   |           |           |           |
|----|---|---|-----------|-----------|-----------|
| 8  | 8 | 0 | -2.207590 | -0.956393 | 0.118191  |
| 9  | 6 | 0 | -2.811037 | -2.059008 | 0.661232  |
| 10 | 6 | 0 | -2.086712 | -3.129457 | 1.191278  |
| 11 | 6 | 0 | -4.201849 | -2.042398 | 0.743154  |
| 12 | 6 | 0 | -2.768288 | -4.181340 | 1.794718  |
| 13 | 1 | 0 | -1.004577 | -3.128822 | 1.126034  |
| 14 | 6 | 0 | -4.873693 | -3.097549 | 1.358527  |
| 15 | 1 | 0 | -4.742571 | -1.197890 | 0.325498  |
| 16 | 6 | 0 | -4.161629 | -4.173294 | 1.882887  |
| 17 | 1 | 0 | -2.204145 | -5.013486 | 2.206814  |
| 18 | 1 | 0 | -5.957857 | -3.075609 | 1.422630  |
| 19 | 1 | 0 | -4.683716 | -4.997209 | 2.359510  |
| 20 | 6 | 0 | 4.336753  | 0.019903  | -0.933333 |
| 21 | 6 | 0 | 2.843110  | 0.423020  | -0.902757 |
| 22 | 1 | 0 | 4.739796  | 0.031614  | 0.082746  |
| 23 | 1 | 0 | 4.913532  | 0.722612  | -1.541127 |
| 24 | 1 | 0 | 2.402673  | 0.319585  | 0.089632  |
| 25 | 1 | 0 | 2.675233  | 1.437687  | -1.272285 |
| 26 | 6 | 0 | 3.569008  | -2.228227 | -0.825397 |
| 27 | 1 | 0 | 3.783954  | -3.256387 | -1.128316 |
| 28 | 1 | 0 | 3.739593  | -2.144687 | 0.252455  |
| 29 | 6 | 0 | 2.103714  | -1.877301 | -1.168569 |
| 30 | 1 | 0 | 1.654350  | -2.557295 | -1.893992 |
| 31 | 1 | 0 | 1.460857  | -1.827032 | -0.288164 |
| 32 | 6 | 0 | 2.778904  | -0.578652 | -3.120973 |
| 33 | 1 | 0 | 2.129757  | -1.132116 | -3.802334 |

|    |   |   |           |           |           |
|----|---|---|-----------|-----------|-----------|
| 34 | 1 | 0 | 2.872929  | 0.451752  | -3.472636 |
| 35 | 6 | 0 | 4.148027  | -1.266932 | -2.924654 |
| 36 | 1 | 0 | 4.120684  | -2.290416 | -3.308112 |
| 37 | 1 | 0 | 4.920465  | -0.716087 | -3.467249 |
| 38 | 7 | 0 | 4.500489  | -1.320201 | -1.502824 |
| 39 | 7 | 0 | 2.081492  | -0.512971 | -1.793204 |
| 40 | 6 | 0 | -1.091265 | 1.316271  | 1.242671  |
| 41 | 6 | 0 | -0.511118 | 1.370184  | -0.205915 |
| 42 | 1 | 0 | 0.466015  | 1.863237  | -0.112118 |
| 43 | 6 | 0 | -1.158344 | 2.660663  | 1.825495  |
| 44 | 7 | 0 | -1.217813 | 3.726026  | 2.272779  |
| 45 | 6 | 0 | -1.375430 | 2.296817  | -1.056978 |
| 46 | 6 | 0 | -2.636281 | 1.886657  | -1.506871 |
| 47 | 6 | 0 | -0.923771 | 3.573871  | -1.396489 |
| 48 | 6 | 0 | -3.426850 | 2.738527  | -2.271910 |
| 49 | 1 | 0 | -2.993015 | 0.891094  | -1.252770 |
| 50 | 6 | 0 | -1.710162 | 4.426838  | -2.173147 |
| 51 | 1 | 0 | 0.054378  | 3.902891  | -1.050446 |
| 52 | 6 | 0 | -2.964722 | 4.011516  | -2.610827 |
| 53 | 1 | 0 | -4.404553 | 2.407748  | -2.610928 |
| 54 | 1 | 0 | -1.340046 | 5.414000  | -2.435502 |
| 55 | 1 | 0 | -3.579760 | 4.672300  | -3.214696 |
| 56 | 6 | 0 | -0.312654 | 0.341462  | 2.148796  |
| 57 | 8 | 0 | -0.906137 | -0.563470 | 2.694746  |
| 58 | 6 | 0 | 1.164834  | 0.496917  | 2.318394  |
| 59 | 6 | 0 | 1.897859  | -0.657689 | 2.623212  |

|    |   |   |          |           |          |
|----|---|---|----------|-----------|----------|
| 60 | 6 | 0 | 1.826959 | 1.723416  | 2.196872 |
| 61 | 6 | 0 | 3.276140 | -0.589688 | 2.791221 |
| 62 | 1 | 0 | 1.372688 | -1.603824 | 2.717370 |
| 63 | 6 | 0 | 3.206266 | 1.791793  | 2.385328 |
| 64 | 1 | 0 | 1.281461 | 2.633978  | 1.970671 |
| 65 | 6 | 0 | 3.931191 | 0.638537  | 2.678102 |
| 66 | 1 | 0 | 3.839994 | -1.489690 | 3.017649 |
| 67 | 1 | 0 | 3.712636 | 2.748416  | 2.301887 |
| 68 | 1 | 0 | 5.006986 | 0.694203  | 2.817147 |

-----

### 3(RSR)

SCF Done: E(RM062X) = -1589.22369272

-----

| Center<br>Number | Atomic<br>Number | Atomic<br>Type | Coordinates (Angstroms) |           |           |
|------------------|------------------|----------------|-------------------------|-----------|-----------|
|                  |                  |                | X                       | Y         | Z         |
| 1                | 6                | 0              | -0.545461               | -0.774322 | -1.299437 |
| 2                | 6                | 0              | -0.164751               | -0.677125 | 0.229528  |
| 3                | 1                | 0              | -1.144380               | -0.533825 | 0.700053  |
| 4                | 6                | 0              | 0.607143                | -0.773369 | -2.201150 |
| 5                | 7                | 0              | 1.512395                | -0.745191 | -2.921337 |
| 6                | 6                | 0              | 0.375796                | -1.967799 | 0.821086  |
| 7                | 6                | 0              | 1.052036                | -2.949511 | 0.093365  |
| 8                | 6                | 0              | 0.202955                | -2.164768 | 2.198196  |
| 9                | 6                | 0              | 1.551985                | -4.089960 | 0.726035  |

|    |   |   |           |           |           |
|----|---|---|-----------|-----------|-----------|
| 10 | 1 | 0 | 1.189585  | -2.846274 | -0.978863 |
| 11 | 6 | 0 | 0.701458  | -3.297130 | 2.832670  |
| 12 | 1 | 0 | -0.324814 | -1.407652 | 2.774957  |
| 13 | 6 | 0 | 1.382638  | -4.266849 | 2.095189  |
| 14 | 1 | 0 | 2.073450  | -4.841154 | 0.139827  |
| 15 | 1 | 0 | 0.554756  | -3.426600 | 3.901207  |
| 16 | 1 | 0 | 1.772725  | -5.154132 | 2.585035  |
| 17 | 6 | 0 | -1.457593 | -1.960784 | -1.619879 |
| 18 | 8 | 0 | -1.062178 | -2.889638 | -2.297035 |
| 19 | 6 | 0 | -2.841748 | -1.947302 | -1.056666 |
| 20 | 6 | 0 | -3.569782 | -3.142719 | -1.094369 |
| 21 | 6 | 0 | -3.433865 | -0.792603 | -0.531455 |
| 22 | 6 | 0 | -4.869569 | -3.186282 | -0.606250 |
| 23 | 1 | 0 | -3.100746 | -4.029745 | -1.508504 |
| 24 | 6 | 0 | -4.740178 | -0.837362 | -0.051633 |
| 25 | 1 | 0 | -2.889021 | 0.147171  | -0.496778 |
| 26 | 6 | 0 | -5.456586 | -2.031969 | -0.085353 |
| 27 | 1 | 0 | -5.427450 | -4.117271 | -0.631060 |
| 28 | 1 | 0 | -5.195593 | 0.063433  | 0.348172  |
| 29 | 1 | 0 | -6.473821 | -2.065038 | 0.293506  |
| 30 | 6 | 0 | 0.681656  | 0.545668  | 0.552627  |
| 31 | 6 | 0 | 1.990053  | 0.504843  | 1.232944  |
| 32 | 1 | 0 | -1.084559 | 0.155226  | -1.514632 |
| 33 | 1 | 0 | 2.174538  | -0.417516 | 1.791722  |
| 34 | 1 | 0 | 2.083542  | 1.361230  | 1.906975  |
| 35 | 6 | 0 | 0.094510  | 1.816547  | 0.514973  |



|    |   |   |           |           |           |
|----|---|---|-----------|-----------|-----------|
| 36 | 8 | 0 | 0.575939  | 2.914807  | 0.810962  |
| 37 | 8 | 0 | -1.248547 | 1.765595  | 0.046816  |
| 38 | 6 | 0 | -2.042291 | 2.880462  | 0.134914  |
| 39 | 6 | 0 | -2.815872 | 3.199828  | -0.980059 |
| 40 | 6 | 0 | -2.158148 | 3.622130  | 1.311974  |
| 41 | 6 | 0 | -3.709098 | 4.267850  | -0.919541 |
| 42 | 1 | 0 | -2.708876 | 2.606522  | -1.884041 |
| 43 | 6 | 0 | -3.047049 | 4.692187  | 1.357538  |
| 44 | 1 | 0 | -1.552716 | 3.360300  | 2.171753  |
| 45 | 6 | 0 | -3.825064 | 5.021019  | 0.246602  |
| 46 | 1 | 0 | -4.311039 | 4.511702  | -1.790100 |
| 47 | 1 | 0 | -3.134839 | 5.270770  | 2.272768  |
| 48 | 1 | 0 | -4.517346 | 5.856084  | 0.292250  |
| 49 | 6 | 0 | 4.793136  | -0.418637 | -1.276597 |
| 50 | 6 | 0 | 3.626427  | -0.663271 | -0.293711 |
| 51 | 1 | 0 | 4.423419  | -0.394804 | -2.306142 |
| 52 | 1 | 0 | 5.524324  | -1.226855 | -1.191298 |
| 53 | 1 | 0 | 2.730613  | -1.020247 | -0.798982 |
| 54 | 1 | 0 | 3.888462  | -1.358348 | 0.508732  |
| 55 | 6 | 0 | 4.514398  | 1.942444  | -1.329352 |
| 56 | 1 | 0 | 4.942372  | 2.884390  | -0.975065 |
| 57 | 1 | 0 | 4.410359  | 2.000672  | -2.416087 |
| 58 | 6 | 0 | 3.130395  | 1.695970  | -0.686164 |
| 59 | 1 | 0 | 2.713961  | 2.576499  | -0.193432 |
| 60 | 1 | 0 | 2.398286  | 1.314196  | -1.399490 |
| 61 | 6 | 0 | 4.426430  | 1.015645  | 1.258264  |

|    |   |   |          |          |           |
|----|---|---|----------|----------|-----------|
| 62 | 1 | 0 | 4.221298 | 2.029333 | 1.610747  |
| 63 | 1 | 0 | 4.414985 | 0.330895 | 2.109541  |
| 64 | 6 | 0 | 5.737334 | 0.928638 | 0.441918  |
| 65 | 1 | 0 | 6.355289 | 1.806904 | 0.645425  |
| 66 | 1 | 0 | 6.306320 | 0.036780 | 0.718532  |
| 67 | 7 | 0 | 5.448000 | 0.861925 | -0.993654 |
| 68 | 7 | 0 | 3.282979 | 0.636320 | 0.364977  |

-----

### 3(SRS)

SCF Done: E(RM062X) = -1589.21813616

-----

| Center<br>Number | Atomic<br>Number | Atomic<br>Type | Coordinates (Angstroms) |          |           |
|------------------|------------------|----------------|-------------------------|----------|-----------|
|                  |                  |                | X                       | Y        | Z         |
| 1                | 6                | 0              | 0.022557                | 1.391486 | -1.330754 |
| 2                | 6                | 0              | -0.026562               | 1.184604 | 0.233743  |
| 3                | 1                | 0              | -1.074715               | 0.942073 | 0.425503  |
| 4                | 6                | 0              | 1.151360                | 2.211562 | -1.776600 |
| 5                | 7                | 0              | 2.067425                | 2.832249 | -2.112223 |
| 6                | 6                | 0              | 0.234994                | 2.476857 | 1.022885  |
| 7                | 6                | 0              | 0.022482                | 3.754533 | 0.489234  |
| 8                | 6                | 0              | 0.620820                | 2.389494 | 2.367242  |
| 9                | 6                | 0              | 0.206710                | 4.899259 | 1.264181  |
| 10               | 1                | 0              | -0.293443               | 3.879597 | -0.541537 |
| 11               | 6                | 0              | 0.800887                | 3.530325 | 3.144902  |

|    |   |   |           |           |           |
|----|---|---|-----------|-----------|-----------|
| 12 | 1 | 0 | 0.779567  | 1.410518  | 2.810412  |
| 13 | 6 | 0 | 0.599368  | 4.794713  | 2.595321  |
| 14 | 1 | 0 | 0.040794  | 5.876131  | 0.818790  |
| 15 | 1 | 0 | 1.102067  | 3.428652  | 4.183805  |
| 16 | 1 | 0 | 0.745847  | 5.686904  | 3.197128  |
| 17 | 6 | 0 | -1.287532 | 1.918209  | -1.934965 |
| 18 | 8 | 0 | -1.352798 | 3.020928  | -2.440634 |
| 19 | 6 | 0 | -2.473796 | 1.007831  | -1.896705 |
| 20 | 6 | 0 | -2.406364 | -0.319806 | -1.454410 |
| 21 | 6 | 0 | -3.695149 | 1.525126  | -2.347243 |
| 22 | 6 | 0 | -3.550166 | -1.114842 | -1.464139 |
| 23 | 1 | 0 | -1.473538 | -0.746418 | -1.091453 |
| 24 | 6 | 0 | -4.833696 | 0.729621  | -2.354858 |
| 25 | 1 | 0 | -3.733955 | 2.554991  | -2.687735 |
| 26 | 6 | 0 | -4.761203 | -0.592101 | -1.913217 |
| 27 | 1 | 0 | -3.492599 | -2.143253 | -1.117970 |
| 28 | 1 | 0 | -5.777153 | 1.136649  | -2.705143 |
| 29 | 1 | 0 | -5.650699 | -1.215085 | -1.917727 |
| 30 | 6 | 0 | 0.760682  | -0.013781 | 0.723628  |
| 31 | 6 | 0 | 2.234326  | 0.076426  | 0.903293  |
| 32 | 1 | 0 | 0.174277  | 0.399799  | -1.767015 |
| 33 | 1 | 0 | 2.609745  | 1.089176  | 0.716714  |
| 34 | 1 | 0 | 2.540719  | -0.240382 | 1.907431  |
| 35 | 6 | 0 | 0.134531  | -0.993503 | 1.501712  |
| 36 | 8 | 0 | 0.644406  | -1.915603 | 2.147591  |
| 37 | 8 | 0 | -1.280837 | -0.851996 | 1.570336  |

|    |   |   |           |           |           |
|----|---|---|-----------|-----------|-----------|
| 38 | 6 | 0 | -2.059606 | -1.964878 | 1.468315  |
| 39 | 6 | 0 | -3.357013 | -1.863992 | 1.975569  |
| 40 | 6 | 0 | -1.654276 | -3.129576 | 0.808900  |
| 41 | 6 | 0 | -4.252003 | -2.916637 | 1.811002  |
| 42 | 1 | 0 | -3.649936 | -0.947987 | 2.479853  |
| 43 | 6 | 0 | -2.559308 | -4.178172 | 0.656267  |
| 44 | 1 | 0 | -0.642767 | -3.212624 | 0.426681  |
| 45 | 6 | 0 | -3.860097 | -4.080583 | 1.149828  |
| 46 | 1 | 0 | -5.261023 | -2.824381 | 2.202715  |
| 47 | 1 | 0 | -2.240916 | -5.080133 | 0.140723  |
| 48 | 1 | 0 | -4.558628 | -4.901796 | 1.023806  |
| 49 | 6 | 0 | 4.560044  | -0.655107 | 0.464745  |
| 50 | 6 | 0 | 5.490877  | -1.382012 | -0.534834 |
| 51 | 1 | 0 | 4.767003  | 0.415293  | 0.525645  |
| 52 | 1 | 0 | 4.605606  | -1.087599 | 1.466658  |
| 53 | 1 | 0 | 6.036326  | -0.658349 | -1.146544 |
| 54 | 1 | 0 | 6.217903  | -1.986848 | 0.012899  |
| 55 | 6 | 0 | 3.065781  | -0.399566 | -1.435379 |
| 56 | 1 | 0 | 2.011242  | -0.400064 | -1.710356 |
| 57 | 1 | 0 | 3.460241  | 0.616944  | -1.494559 |
| 58 | 6 | 0 | 3.879641  | -1.405851 | -2.281960 |
| 59 | 1 | 0 | 3.210473  | -2.055564 | -2.852450 |
| 60 | 1 | 0 | 4.514494  | -0.862718 | -2.986558 |
| 61 | 6 | 0 | 3.845095  | -3.097049 | -0.611516 |
| 62 | 1 | 0 | 3.371129  | -3.843858 | -1.253854 |
| 63 | 1 | 0 | 4.467217  | -3.620522 | 0.119913  |

|    |   |   |          |           |           |
|----|---|---|----------|-----------|-----------|
| 64 | 6 | 0 | 2.761169 | -2.258625 | 0.103409  |
| 65 | 1 | 0 | 1.778192 | -2.348062 | -0.364143 |
| 66 | 1 | 0 | 2.659539 | -2.491347 | 1.162272  |
| 67 | 7 | 0 | 3.137852 | -0.807620 | 0.001855  |
| 68 | 7 | 0 | 4.718197 | -2.248658 | -1.427832 |

### 3(SSR)

SCF Done: E(RM062X) = -1589.22346973

| Center<br>Number | Atomic<br>Number | Atomic<br>Type | Coordinates (Angstroms) |           |           |
|------------------|------------------|----------------|-------------------------|-----------|-----------|
|                  |                  |                | X                       | Y         | Z         |
| 1                | 6                | 0              | -0.311961               | -0.059166 | 0.819077  |
| 2                | 6                | 0              | 0.549331                | -0.182481 | 2.019323  |
| 3                | 1                | 0              | -2.083772               | 1.024657  | -1.209320 |
| 4                | 1                | 0              | 0.682121                | 0.771248  | 2.544901  |
| 5                | 1                | 0              | 0.150717                | -0.927820 | 2.713514  |
| 6                | 6                | 0              | -1.127634               | -1.177522 | 0.608030  |
| 7                | 8                | 0              | -1.007930               | -2.305031 | 1.101570  |
| 8                | 8                | 0              | -2.230919               | -0.937701 | -0.245808 |
| 9                | 6                | 0              | -2.803212               | -1.995355 | -0.901085 |
| 10               | 6                | 0              | -4.191403               | -1.993190 | -1.018382 |
| 11               | 6                | 0              | -2.046293               | -3.001913 | -1.505502 |
| 12               | 6                | 0              | -4.827858               | -2.998466 | -1.745142 |
| 13               | 1                | 0              | -4.757240               | -1.198723 | -0.540396 |

|    |   |   |           |           |           |
|----|---|---|-----------|-----------|-----------|
| 14 | 6 | 0 | -2.692302 | -4.004910 | -2.220519 |
| 15 | 1 | 0 | -0.966119 | -2.987555 | -1.412488 |
| 16 | 6 | 0 | -4.083038 | -4.010707 | -2.345094 |
| 17 | 1 | 0 | -5.910256 | -2.988610 | -1.836175 |
| 18 | 1 | 0 | -2.102925 | -4.787084 | -2.690944 |
| 19 | 1 | 0 | -4.578697 | -4.797163 | -2.905901 |
| 20 | 6 | 0 | 2.664680  | -0.841385 | 3.145416  |
| 21 | 6 | 0 | 4.037576  | -1.519139 | 2.936499  |
| 22 | 1 | 0 | 2.751685  | 0.157615  | 3.579519  |
| 23 | 1 | 0 | 1.994626  | -1.443441 | 3.761900  |
| 24 | 1 | 0 | 4.797654  | -1.008119 | 3.532912  |
| 25 | 1 | 0 | 3.999507  | -2.565769 | 3.250257  |
| 26 | 6 | 0 | 2.803294  | 0.325409  | 1.013923  |
| 27 | 1 | 0 | 2.382711  | 0.312857  | 0.007533  |
| 28 | 1 | 0 | 2.641565  | 1.308308  | 1.463096  |
| 29 | 6 | 0 | 4.291001  | -0.102138 | 1.043464  |
| 30 | 1 | 0 | 4.713540  | -0.028298 | 0.038055  |
| 31 | 1 | 0 | 4.865355  | 0.549847  | 1.707622  |
| 32 | 6 | 0 | 3.505605  | -2.328585 | 0.761319  |
| 33 | 1 | 0 | 3.710400  | -2.177048 | -0.303069 |
| 34 | 1 | 0 | 3.699965  | -3.376778 | 1.002769  |
| 35 | 6 | 0 | 2.034168  | -1.981243 | 1.082122  |
| 36 | 1 | 0 | 1.421965  | -1.853534 | 0.187861  |
| 37 | 1 | 0 | 1.550247  | -2.706714 | 1.738150  |
| 38 | 7 | 0 | 2.007573  | -0.667695 | 1.807245  |
| 39 | 7 | 0 | 4.425937  | -1.479295 | 1.524269  |

|    |   |   |           |           |           |
|----|---|---|-----------|-----------|-----------|
| 40 | 6 | 0 | -1.063826 | 1.412366  | -1.168546 |
| 41 | 6 | 0 | -0.534206 | 1.351024  | 0.299257  |
| 42 | 1 | 0 | 0.447500  | 1.843255  | 0.274795  |
| 43 | 6 | 0 | -1.117131 | 2.797656  | -1.648048 |
| 44 | 7 | 0 | -1.164051 | 3.894319  | -2.013797 |
| 45 | 6 | 0 | -1.419530 | 2.215754  | 1.192835  |
| 46 | 6 | 0 | -2.679663 | 1.768668  | 1.606646  |
| 47 | 6 | 0 | -0.982505 | 3.474714  | 1.610988  |
| 48 | 6 | 0 | -3.483118 | 2.566843  | 2.415683  |
| 49 | 1 | 0 | -3.025659 | 0.787500  | 1.289866  |
| 50 | 6 | 0 | -1.781878 | 4.273637  | 2.430017  |
| 51 | 1 | 0 | -0.004272 | 3.831083  | 1.293447  |
| 52 | 6 | 0 | -3.035231 | 3.821625  | 2.833077  |
| 53 | 1 | 0 | -4.459859 | 2.208313  | 2.728336  |
| 54 | 1 | 0 | -1.422316 | 5.246226  | 2.753833  |
| 55 | 1 | 0 | -3.660362 | 4.439915  | 3.470620  |
| 56 | 6 | 0 | -0.245904 | 0.511353  | -2.115337 |
| 57 | 8 | 0 | -0.811778 | -0.362771 | -2.735620 |
| 58 | 6 | 0 | 1.234447  | 0.693283  | -2.229436 |
| 59 | 6 | 0 | 1.882519  | 1.909100  | -1.985419 |
| 60 | 6 | 0 | 1.986987  | -0.428536 | -2.602432 |
| 61 | 6 | 0 | 3.266780  | 1.999978  | -2.120655 |
| 62 | 1 | 0 | 1.323728  | 2.795515  | -1.702649 |
| 63 | 6 | 0 | 3.369325  | -0.339719 | -2.717253 |
| 64 | 1 | 0 | 1.472809  | -1.366843 | -2.789239 |
| 65 | 6 | 0 | 4.010467  | 0.878541  | -2.481732 |

|    |   |   |          |           |           |
|----|---|---|----------|-----------|-----------|
| 66 | 1 | 0 | 3.762379 | 2.949280  | -1.942811 |
| 67 | 1 | 0 | 3.947969 | -1.215488 | -2.995279 |
| 68 | 1 | 0 | 5.089955 | 0.951140  | -2.578148 |

-----

**TS3/P(RRS)**

SCF Done: E(RM062X) = -1589.21059535

Imaginary Frequencies = -137.9798

-----

| Center<br>Number | Atomic<br>Number | Atomic<br>Type | Coordinates (Angstroms) |           |           |
|------------------|------------------|----------------|-------------------------|-----------|-----------|
|                  |                  |                | X                       | Y         | Z         |
| 1                | 6                | 0              | -0.485848               | 0.112565  | -1.082443 |
| 2                | 6                | 0              | 0.407572                | 0.072130  | -2.129407 |
| 3                | 1                | 0              | -1.908064               | 0.660815  | 1.327951  |
| 4                | 1                | 0              | 0.870546                | 0.993845  | -2.476759 |
| 5                | 1                | 0              | 0.301253                | -0.715545 | -2.869281 |
| 6                | 6                | 0              | -1.264566               | -1.098876 | -0.897131 |
| 7                | 8                | 0              | -1.058457               | -2.178012 | -1.419636 |
| 8                | 8                | 0              | -2.358334               | -0.914723 | -0.073427 |
| 9                | 6                | 0              | -3.089686               | -2.022638 | 0.319800  |
| 10               | 6                | 0              | -2.488060               | -3.069212 | 1.014367  |
| 11               | 6                | 0              | -4.456345               | -2.012840 | 0.068700  |
| 12               | 6                | 0              | -3.278708               | -4.126962 | 1.453467  |
| 13               | 1                | 0              | -1.421325               | -3.038980 | 1.206633  |
| 14               | 6                | 0              | -5.238716               | -3.074430 | 0.520972  |



|    |   |   |           |           |           |
|----|---|---|-----------|-----------|-----------|
| 15 | 1 | 0 | -4.894577 | -1.177737 | -0.469741 |
| 16 | 6 | 0 | -4.652919 | -4.134152 | 1.209601  |
| 17 | 1 | 0 | -2.817298 | -4.948633 | 1.993282  |
| 18 | 1 | 0 | -6.307629 | -3.070610 | 0.329712  |
| 19 | 1 | 0 | -5.263341 | -4.962221 | 1.556578  |
| 20 | 6 | 0 | 4.614744  | -0.293697 | -0.986400 |
| 21 | 6 | 0 | 3.192600  | 0.311320  | -1.156162 |
| 22 | 1 | 0 | 4.999161  | -0.099866 | 0.019996  |
| 23 | 1 | 0 | 5.313981  | 0.140070  | -1.708202 |
| 24 | 1 | 0 | 2.773160  | 0.632211  | -0.198074 |
| 25 | 1 | 0 | 3.193430  | 1.167339  | -1.838957 |
| 26 | 6 | 0 | 3.546607  | -2.320919 | -0.330435 |
| 27 | 1 | 0 | 3.596768  | -3.412094 | -0.398534 |
| 28 | 1 | 0 | 3.784385  | -2.033111 | 0.699363  |
| 29 | 6 | 0 | 2.138983  | -1.811287 | -0.742987 |
| 30 | 1 | 0 | 1.543465  | -2.589868 | -1.227539 |
| 31 | 1 | 0 | 1.562681  | -1.432797 | 0.109558  |
| 32 | 6 | 0 | 2.878501  | -1.248589 | -2.951076 |
| 33 | 1 | 0 | 2.147011  | -1.919833 | -3.412589 |
| 34 | 1 | 0 | 3.049231  | -0.404229 | -3.627153 |
| 35 | 6 | 0 | 4.201116  | -1.992327 | -2.605299 |
| 36 | 1 | 0 | 4.084919  | -3.072644 | -2.737744 |
| 37 | 1 | 0 | 5.016359  | -1.655424 | -3.252838 |
| 38 | 7 | 0 | 4.576907  | -1.744424 | -1.207051 |
| 39 | 7 | 0 | 2.297725  | -0.717012 | -1.709308 |
| 40 | 6 | 0 | -0.955678 | 1.185950  | 1.227762  |

|    |   |   |           |           |           |
|----|---|---|-----------|-----------|-----------|
| 41 | 6 | 0 | -0.665246 | 1.407915  | -0.300699 |
| 42 | 1 | 0 | 0.301379  | 1.921936  | -0.352592 |
| 43 | 6 | 0 | -1.105699 | 2.450182  | 1.953262  |
| 44 | 7 | 0 | -1.247525 | 3.441545  | 2.531739  |
| 45 | 6 | 0 | -1.693603 | 2.370577  | -0.886719 |
| 46 | 6 | 0 | -2.925586 | 1.934939  | -1.384537 |
| 47 | 6 | 0 | -1.404753 | 3.738786  | -0.914131 |
| 48 | 6 | 0 | -3.848009 | 2.848813  | -1.889508 |
| 49 | 1 | 0 | -3.163440 | 0.875582  | -1.381741 |
| 50 | 6 | 0 | -2.324911 | 4.654609  | -1.421123 |
| 51 | 1 | 0 | -0.446634 | 4.088423  | -0.534656 |
| 52 | 6 | 0 | -3.552050 | 4.211182  | -1.909148 |
| 53 | 1 | 0 | -4.800472 | 2.493374  | -2.272214 |
| 54 | 1 | 0 | -2.079646 | 5.712635  | -1.437855 |
| 55 | 1 | 0 | -4.271306 | 4.921185  | -2.306508 |
| 56 | 6 | 0 | 0.101880  | 0.260123  | 1.852550  |
| 57 | 8 | 0 | -0.206912 | -0.895055 | 2.067770  |
| 58 | 6 | 0 | 1.493756  | 0.743024  | 2.104635  |
| 59 | 6 | 0 | 2.425192  | -0.208404 | 2.544594  |
| 60 | 6 | 0 | 1.913701  | 2.059875  | 1.879425  |
| 61 | 6 | 0 | 3.752503  | 0.146340  | 2.747915  |
| 62 | 1 | 0 | 2.091695  | -1.227451 | 2.715636  |
| 63 | 6 | 0 | 3.245679  | 2.412750  | 2.083547  |
| 64 | 1 | 0 | 1.225148  | 2.824307  | 1.536787  |
| 65 | 6 | 0 | 4.165246  | 1.459371  | 2.513892  |
| 66 | 1 | 0 | 4.466734  | -0.598237 | 3.086678  |

|    |   |   |          |          |          |
|----|---|---|----------|----------|----------|
| 67 | 1 | 0 | 3.562416 | 3.435130 | 1.902970 |
| 68 | 1 | 0 | 5.203709 | 1.737289 | 2.668809 |

---

**TS3/P(RSR)**

SCF Done: E(RM062X) = -1589.21152246

Imaginary Frequencies = -135.8430

---

| Center<br>Number | Atomic<br>Number | Atomic<br>Type | Coordinates (Angstroms) |           |           |
|------------------|------------------|----------------|-------------------------|-----------|-----------|
|                  |                  |                | X                       | Y         | Z         |
| 1                | 6                | 0              | -0.736846               | -0.701265 | -1.077961 |
| 2                | 6                | 0              | -0.359658               | -0.727886 | 0.446016  |
| 3                | 1                | 0              | -1.330502               | -0.616484 | 0.941569  |
| 4                | 6                | 0              | 0.405728                | -0.619694 | -1.990929 |
| 5                | 7                | 0              | 1.285810                | -0.531651 | -2.736098 |
| 6                | 6                | 0              | 0.199578                | -2.056906 | 0.921532  |
| 7                | 6                | 0              | 1.036586                | -2.866918 | 0.149959  |
| 8                | 6                | 0              | -0.109888               | -2.465903 | 2.224081  |
| 9                | 6                | 0              | 1.555703                | -4.052815 | 0.671765  |
| 10               | 1                | 0              | 1.282303                | -2.594307 | -0.871431 |
| 11               | 6                | 0              | 0.407348                | -3.646542 | 2.747999  |
| 12               | 1                | 0              | -0.762305               | -1.843595 | 2.832860  |
| 13               | 6                | 0              | 1.246402                | -4.445227 | 1.970847  |
| 14               | 1                | 0              | 2.201034                | -4.670649 | 0.054145  |
| 15               | 1                | 0              | 0.151601                | -3.944819 | 3.760562  |

|    |   |   |           |           |           |
|----|---|---|-----------|-----------|-----------|
| 16 | 1 | 0 | 1.649950  | -5.369247 | 2.374011  |
| 17 | 6 | 0 | -1.609901 | -1.901797 | -1.466657 |
| 18 | 8 | 0 | -1.172640 | -2.774352 | -2.188675 |
| 19 | 6 | 0 | -2.994308 | -1.969899 | -0.911271 |
| 20 | 6 | 0 | -3.678420 | -3.184819 | -1.038448 |
| 21 | 6 | 0 | -3.629199 | -0.876832 | -0.309074 |
| 22 | 6 | 0 | -4.977744 | -3.309829 | -0.564003 |
| 23 | 1 | 0 | -3.175423 | -4.021890 | -1.511950 |
| 24 | 6 | 0 | -4.934252 | -1.003728 | 0.159388  |
| 25 | 1 | 0 | -3.122130 | 0.079109  | -0.204823 |
| 26 | 6 | 0 | -5.607134 | -2.217523 | 0.034834  |
| 27 | 1 | 0 | -5.501238 | -4.255950 | -0.660749 |
| 28 | 1 | 0 | -5.424258 | -0.152478 | 0.621368  |
| 29 | 1 | 0 | -6.623589 | -2.313219 | 0.404975  |
| 30 | 6 | 0 | 0.490631  | 0.458164  | 0.881776  |
| 31 | 6 | 0 | 1.704852  | 0.365458  | 1.519565  |
| 32 | 1 | 0 | -1.306102 | 0.220572  | -1.240392 |
| 33 | 1 | 0 | 2.078636  | -0.596806 | 1.858660  |
| 34 | 1 | 0 | 2.051701  | 1.235357  | 2.069840  |
| 35 | 6 | 0 | -0.064407 | 1.800138  | 0.792674  |
| 36 | 8 | 0 | 0.501997  | 2.849232  | 1.023034  |
| 37 | 8 | 0 | -1.399268 | 1.773679  | 0.420862  |
| 38 | 6 | 0 | -2.106646 | 2.962028  | 0.333011  |
| 39 | 6 | 0 | -2.785481 | 3.210049  | -0.854959 |
| 40 | 6 | 0 | -2.205009 | 3.830308  | 1.417248  |
| 41 | 6 | 0 | -3.575994 | 4.352945  | -0.961853 |

|    |   |   |           |           |           |
|----|---|---|-----------|-----------|-----------|
| 42 | 1 | 0 | -2.690334 | 2.509668  | -1.679871 |
| 43 | 6 | 0 | -2.992043 | 4.972000  | 1.295017  |
| 44 | 1 | 0 | -1.670286 | 3.612188  | 2.334882  |
| 45 | 6 | 0 | -3.678019 | 5.237500  | 0.109599  |
| 46 | 1 | 0 | -4.109547 | 4.549828  | -1.886858 |
| 47 | 1 | 0 | -3.071321 | 5.656570  | 2.134303  |
| 48 | 1 | 0 | -4.291141 | 6.129369  | 0.024464  |
| 49 | 6 | 0 | 5.109820  | -0.458683 | -1.123984 |
| 50 | 6 | 0 | 3.785048  | -0.660054 | -0.335364 |
| 51 | 1 | 0 | 5.007266  | -0.821216 | -2.151613 |
| 52 | 1 | 0 | 5.934513  | -1.001339 | -0.651032 |
| 53 | 1 | 0 | 2.959256  | -0.931040 | -0.996927 |
| 54 | 1 | 0 | 3.880728  | -1.434378 | 0.433420  |
| 55 | 6 | 0 | 4.308257  | 1.716063  | -1.673269 |
| 56 | 1 | 0 | 4.605860  | 2.756337  | -1.838552 |
| 57 | 1 | 0 | 4.031478  | 1.283352  | -2.640715 |
| 58 | 6 | 0 | 3.126385  | 1.634858  | -0.671183 |
| 59 | 1 | 0 | 2.978507  | 2.574637  | -0.131046 |
| 60 | 1 | 0 | 2.182481  | 1.375092  | -1.160496 |
| 61 | 6 | 0 | 4.556527  | 1.047041  | 1.153662  |
| 62 | 1 | 0 | 4.233967  | 1.908638  | 1.747570  |
| 63 | 1 | 0 | 4.812714  | 0.231067  | 1.837564  |
| 64 | 6 | 0 | 5.743541  | 1.409783  | 0.213335  |
| 65 | 1 | 0 | 5.905262  | 2.492230  | 0.191521  |
| 66 | 1 | 0 | 6.668098  | 0.934513  | 0.555126  |
| 67 | 7 | 0 | 5.464229  | 0.965964  | -1.159286 |

68            7            0            3.426156    0.601449    0.327916

---

**TS3/P(SRS)**

SCF Done: E(RM062X) = -1589.20675607

Imaginary Frequencies = -168.6421

---

| Center<br>Number | Atomic<br>Number | Atomic<br>Type | Coordinates (Angstroms) |          |           |
|------------------|------------------|----------------|-------------------------|----------|-----------|
|                  |                  |                | X                       | Y        | Z         |
| 1                | 6                | 0              | 0.053235                | 1.311243 | -1.116440 |
| 2                | 6                | 0              | -0.113665               | 1.224646 | 0.442364  |
| 3                | 1                | 0              | -1.177580               | 1.006738 | 0.577780  |
| 4                | 6                | 0              | 1.326854                | 1.915512 | -1.514495 |
| 5                | 7                | 0              | 2.346995                | 2.368521 | -1.816436 |
| 6                | 6                | 0              | 0.141003                | 2.539056 | 1.184801  |
| 7                | 6                | 0              | 0.219018                | 3.784967 | 0.554993  |
| 8                | 6                | 0              | 0.223551                | 2.506527 | 2.584678  |
| 9                | 6                | 0              | 0.392676                | 4.954804 | 1.297688  |
| 10               | 1                | 0              | 0.142211                | 3.873392 | -0.523268 |
| 11               | 6                | 0              | 0.388948                | 3.670750 | 3.326440  |
| 12               | 1                | 0              | 0.159039                | 1.550575 | 3.096480  |
| 13               | 6                | 0              | 0.480575                | 4.905475 | 2.684099  |
| 14               | 1                | 0              | 0.458644                | 5.907388 | 0.779740  |
| 15               | 1                | 0              | 0.448886                | 3.612545 | 4.409563  |
| 16               | 1                | 0              | 0.617549                | 5.816674 | 3.258927  |

|    |   |   |           |           |           |
|----|---|---|-----------|-----------|-----------|
| 17 | 6 | 0 | -1.115601 | 2.000657  | -1.838970 |
| 18 | 8 | 0 | -0.965469 | 3.062890  | -2.407984 |
| 19 | 6 | 0 | -2.443044 | 1.315589  | -1.808167 |
| 20 | 6 | 0 | -2.595874 | -0.038687 | -1.486870 |
| 21 | 6 | 0 | -3.570110 | 2.080861  | -2.133772 |
| 22 | 6 | 0 | -3.862822 | -0.616312 | -1.488710 |
| 23 | 1 | 0 | -1.738082 | -0.657415 | -1.240748 |
| 24 | 6 | 0 | -4.833322 | 1.503621  | -2.127993 |
| 25 | 1 | 0 | -3.438367 | 3.129062  | -2.383619 |
| 26 | 6 | 0 | -4.980313 | 0.153906  | -1.805087 |
| 27 | 1 | 0 | -3.974635 | -1.669468 | -1.245529 |
| 28 | 1 | 0 | -5.704030 | 2.102864  | -2.375193 |
| 29 | 1 | 0 | -5.967792 | -0.298120 | -1.801876 |
| 30 | 6 | 0 | 0.638704  | 0.044379  | 1.031261  |
| 31 | 6 | 0 | 1.980868  | 0.069320  | 1.359494  |
| 32 | 1 | 0 | 0.087263  | 0.276629  | -1.476507 |
| 33 | 1 | 0 | 2.523638  | 1.011683  | 1.296123  |
| 34 | 1 | 0 | 2.334006  | -0.624823 | 2.115856  |
| 35 | 6 | 0 | -0.053395 | -1.187518 | 1.334110  |
| 36 | 8 | 0 | 0.450647  | -2.247646 | 1.664343  |
| 37 | 8 | 0 | -1.429014 | -1.057914 | 1.242694  |
| 38 | 6 | 0 | -2.227518 | -2.178945 | 1.170305  |
| 39 | 6 | 0 | -3.395482 | -2.168769 | 1.925895  |
| 40 | 6 | 0 | -1.948720 | -3.224304 | 0.290654  |
| 41 | 6 | 0 | -4.302731 | -3.218204 | 1.796038  |
| 42 | 1 | 0 | -3.586018 | -1.335479 | 2.595113  |

|    |   |   |           |           |           |
|----|---|---|-----------|-----------|-----------|
| 43 | 6 | 0 | -2.861566 | -4.269444 | 0.173691  |
| 44 | 1 | 0 | -1.034029 | -3.213992 | -0.292910 |
| 45 | 6 | 0 | -4.039908 | -4.270566 | 0.921287  |
| 46 | 1 | 0 | -5.217512 | -3.209140 | 2.380900  |
| 47 | 1 | 0 | -2.651084 | -5.085435 | -0.511362 |
| 48 | 1 | 0 | -4.748682 | -5.086522 | 0.820800  |
| 49 | 6 | 0 | 4.402477  | -0.076951 | -0.335942 |
| 50 | 6 | 0 | 5.258088  | -0.870399 | -1.365812 |
| 51 | 1 | 0 | 4.016993  | 0.853814  | -0.760324 |
| 52 | 1 | 0 | 4.971372  | 0.162449  | 0.568032  |
| 53 | 1 | 0 | 5.146226  | -0.446945 | -2.368888 |
| 54 | 1 | 0 | 6.317972  | -0.833948 | -1.096760 |
| 55 | 6 | 0 | 2.537845  | -1.370304 | -1.124892 |
| 56 | 1 | 0 | 1.608662  | -1.849326 | -0.797756 |
| 57 | 1 | 0 | 2.284620  | -0.486406 | -1.715907 |
| 58 | 6 | 0 | 3.456030  | -2.331593 | -1.929389 |
| 59 | 1 | 0 | 3.108152  | -3.366154 | -1.848624 |
| 60 | 1 | 0 | 3.462716  | -2.056907 | -2.988455 |
| 61 | 6 | 0 | 4.832228  | -2.809046 | -0.047729 |
| 62 | 1 | 0 | 4.630770  | -3.883826 | -0.087952 |
| 63 | 1 | 0 | 5.833131  | -2.666191 | 0.371096  |
| 64 | 6 | 0 | 3.761857  | -2.085051 | 0.812071  |
| 65 | 1 | 0 | 2.898344  | -2.718685 | 1.032401  |
| 66 | 1 | 0 | 4.178347  | -1.731502 | 1.760741  |
| 67 | 7 | 0 | 3.259802  | -0.912712 | 0.069484  |
| 68 | 7 | 0 | 4.830437  | -2.274877 | -1.415035 |



-----  
**TS3/P(SSR)**

SCF Done: E(RM062X) = -1589.21095959

Imaginary Frequencies = -157.4215  
-----

| Center<br>Number | Atomic<br>Number | Atomic<br>Type | Coordinates (Angstroms) |           |           |
|------------------|------------------|----------------|-------------------------|-----------|-----------|
|                  |                  |                | X                       | Y         | Z         |
| 1                | 6                | 0              | -0.432446               | 0.106786  | 1.008744  |
| 2                | 6                | 0              | 0.472705                | 0.039459  | 2.050590  |
| 3                | 1                | 0              | -1.750997               | 0.690638  | -1.492436 |
| 4                | 1                | 0              | 0.937722                | 0.954568  | 2.413561  |
| 5                | 1                | 0              | 0.332286                | -0.742136 | 2.792175  |
| 6                | 6                | 0              | -1.256076               | -1.067902 | 0.823481  |
| 7                | 8                | 0              | -1.088332               | -2.168864 | 1.315850  |
| 8                | 8                | 0              | -2.353028               | -0.812450 | 0.022811  |
| 9                | 6                | 0              | -3.135072               | -1.879915 | -0.381643 |
| 10               | 6                | 0              | -4.470854               | -1.895045 | 0.000528  |
| 11               | 6                | 0              | -2.607646               | -2.861252 | -1.216554 |
| 12               | 6                | 0              | -5.297983               | -2.916640 | -0.464982 |
| 13               | 1                | 0              | -4.847179               | -1.111084 | 0.650887  |
| 14               | 6                | 0              | -3.441201               | -3.879705 | -1.668950 |
| 15               | 1                | 0              | -1.562801               | -2.808224 | -1.504695 |
| 16               | 6                | 0              | -4.785986               | -3.910521 | -1.296210 |
| 17               | 1                | 0              | -6.344011               | -2.933428 | -0.173799 |

|    |   |   |           |           |           |
|----|---|---|-----------|-----------|-----------|
| 18 | 1 | 0 | -3.039766 | -4.649253 | -2.321734 |
| 19 | 1 | 0 | -5.432070 | -4.705656 | -1.655446 |
| 20 | 6 | 0 | 2.827060  | -1.368911 | 2.895094  |
| 21 | 6 | 0 | 4.147058  | -2.125917 | 2.569720  |
| 22 | 1 | 0 | 2.985303  | -0.559241 | 3.615016  |
| 23 | 1 | 0 | 2.063245  | -2.043808 | 3.294044  |
| 24 | 1 | 0 | 4.945055  | -1.824285 | 3.254827  |
| 25 | 1 | 0 | 4.007186  | -3.207262 | 2.664609  |
| 26 | 6 | 0 | 3.253494  | 0.256457  | 1.182596  |
| 27 | 1 | 0 | 2.874597  | 0.640023  | 0.231521  |
| 28 | 1 | 0 | 3.258926  | 1.074200  | 1.910496  |
| 29 | 6 | 0 | 4.660536  | -0.386237 | 1.025226  |
| 30 | 1 | 0 | 5.073181  | -0.170684 | 0.034641  |
| 31 | 1 | 0 | 5.354462  | 0.003779  | 1.776361  |
| 32 | 6 | 0 | 3.562833  | -2.358308 | 0.263726  |
| 33 | 1 | 0 | 3.847543  | -2.045988 | -0.746755 |
| 34 | 1 | 0 | 3.577329  | -3.451944 | 0.298475  |
| 35 | 6 | 0 | 2.155886  | -1.818940 | 0.638502  |
| 36 | 1 | 0 | 1.628098  | -1.388116 | -0.219147 |
| 37 | 1 | 0 | 1.515279  | -2.593903 | 1.068314  |
| 38 | 7 | 0 | 2.308722  | -0.769210 | 1.655004  |
| 39 | 7 | 0 | 4.576364  | -1.841316 | 1.194530  |
| 40 | 6 | 0 | -0.834478 | 1.246178  | -1.286015 |
| 41 | 6 | 0 | -0.667919 | 1.413131  | 0.260290  |
| 42 | 1 | 0 | 0.237306  | 2.011414  | 0.415992  |
| 43 | 6 | 0 | -0.978500 | 2.545238  | -1.949421 |

|    |   |   |           |           |           |
|----|---|---|-----------|-----------|-----------|
| 44 | 7 | 0 | -1.115603 | 3.569383  | -2.468976 |
| 45 | 6 | 0 | -1.823547 | 2.215116  | 0.858301  |
| 46 | 6 | 0 | -3.140728 | 2.136618  | 0.395885  |
| 47 | 6 | 0 | -1.550081 | 3.042788  | 1.953080  |
| 48 | 6 | 0 | -4.156536 | 2.859967  | 1.021146  |
| 49 | 1 | 0 | -3.391373 | 1.506939  | -0.452408 |
| 50 | 6 | 0 | -2.562203 | 3.763513  | 2.580309  |
| 51 | 1 | 0 | -0.527700 | 3.119798  | 2.316885  |
| 52 | 6 | 0 | -3.873720 | 3.672769  | 2.115874  |
| 53 | 1 | 0 | -5.173378 | 2.785639  | 0.646247  |
| 54 | 1 | 0 | -2.324675 | 4.399253  | 3.428457  |
| 55 | 1 | 0 | -4.667157 | 4.233652  | 2.600812  |
| 56 | 6 | 0 | 0.277770  | 0.367951  | -1.875869 |
| 57 | 8 | 0 | 0.002566  | -0.789059 | -2.127992 |
| 58 | 6 | 0 | 1.665685  | 0.884972  | -2.055084 |
| 59 | 6 | 0 | 2.051241  | 2.193801  | -1.741266 |
| 60 | 6 | 0 | 2.628582  | -0.025190 | -2.513935 |
| 61 | 6 | 0 | 3.382595  | 2.579898  | -1.878607 |
| 62 | 1 | 0 | 1.334304  | 2.922324  | -1.378882 |
| 63 | 6 | 0 | 3.954543  | 0.362703  | -2.651298 |
| 64 | 1 | 0 | 2.319671  | -1.038135 | -2.753238 |
| 65 | 6 | 0 | 4.333964  | 1.667820  | -2.329610 |
| 66 | 1 | 0 | 3.674264  | 3.595093  | -1.628949 |
| 67 | 1 | 0 | 4.693886  | -0.349383 | -3.005632 |
| 68 | 1 | 0 | 5.371567  | 1.972101  | -2.431339 |

---

**P(RRS)**

SCF Done: E(RM062X) = -1244.02133061

---

| Center<br>Number | Atomic<br>Number | Atomic<br>Type | Coordinates (Angstroms) |           |           |
|------------------|------------------|----------------|-------------------------|-----------|-----------|
|                  |                  |                | X                       | Y         | Z         |
| 1                | 6                | 0              | -0.339314               | 0.115558  | -0.990882 |
| 2                | 6                | 0              | 0.660555                | 0.004063  | -1.868103 |
| 3                | 1                | 0              | -1.615632               | 0.627769  | 1.509675  |
| 4                | 1                | 0              | 1.330698                | 0.835351  | -2.068230 |
| 5                | 1                | 0              | 0.823847                | -0.923304 | -2.408214 |
| 6                | 6                | 0              | -1.167205               | -1.116643 | -0.779419 |
| 7                | 8                | 0              | -0.912721               | -2.202232 | -1.234453 |
| 8                | 8                | 0              | -2.261438               | -0.876247 | -0.014944 |
| 9                | 6                | 0              | -3.058275               | -1.972653 | 0.325316  |
| 10               | 6                | 0              | -2.760333               | -2.671826 | 1.487027  |
| 11               | 6                | 0              | -4.148474               | -2.291308 | -0.472109 |
| 12               | 6                | 0              | -3.589125               | -3.727090 | 1.860656  |
| 13               | 1                | 0              | -1.893838               | -2.382819 | 2.073214  |
| 14               | 6                | 0              | -4.969528               | -3.349195 | -0.085612 |
| 15               | 1                | 0              | -4.346264               | -1.718353 | -1.373134 |
| 16               | 6                | 0              | -4.691768               | -4.066529 | 1.077202  |
| 17               | 1                | 0              | -3.371091               | -4.284107 | 2.766739  |
| 18               | 1                | 0              | -5.828176               | -3.611064 | -0.696158 |
| 19               | 1                | 0              | -5.334456               | -4.889979 | 1.372702  |

|    |   |   |           |           |           |
|----|---|---|-----------|-----------|-----------|
| 20 | 6 | 0 | -0.675808 | 1.148185  | 1.310906  |
| 21 | 6 | 0 | -0.561724 | 1.415823  | -0.232694 |
| 22 | 1 | 0 | 0.358656  | 1.989037  | -0.379800 |
| 23 | 6 | 0 | -0.713716 | 2.381086  | 2.099846  |
| 24 | 7 | 0 | -0.762719 | 3.343401  | 2.738713  |
| 25 | 6 | 0 | -1.697557 | 2.291957  | -0.748957 |
| 26 | 6 | 0 | -2.812795 | 1.788127  | -1.422968 |
| 27 | 6 | 0 | -1.595780 | 3.676892  | -0.566891 |
| 28 | 6 | 0 | -3.811528 | 2.646046  | -1.881362 |
| 29 | 1 | 0 | -2.911160 | 0.724173  | -1.606613 |
| 30 | 6 | 0 | -2.595123 | 4.534014  | -1.018698 |
| 31 | 1 | 0 | -0.716687 | 4.088836  | -0.076955 |
| 32 | 6 | 0 | -3.711179 | 4.019371  | -1.675433 |
| 33 | 1 | 0 | -4.669032 | 2.233901  | -2.405251 |
| 34 | 1 | 0 | -2.494037 | 5.604689  | -0.867299 |
| 35 | 1 | 0 | -4.489860 | 4.685536  | -2.034669 |
| 36 | 6 | 0 | 0.436559  | 0.180373  | 1.766642  |
| 37 | 8 | 0 | 0.135419  | -0.989026 | 1.904465  |
| 38 | 6 | 0 | 1.840262  | 0.642481  | 1.962095  |
| 39 | 6 | 0 | 2.758368  | -0.299317 | 2.448115  |
| 40 | 6 | 0 | 2.274542  | 1.942070  | 1.673301  |
| 41 | 6 | 0 | 4.085170  | 0.054161  | 2.650960  |
| 42 | 1 | 0 | 2.413006  | -1.304761 | 2.666003  |
| 43 | 6 | 0 | 3.607637  | 2.290958  | 1.871647  |
| 44 | 1 | 0 | 1.593727  | 2.695469  | 1.291805  |
| 45 | 6 | 0 | 4.511392  | 1.351428  | 2.362350  |

|    |   |   |          |           |          |
|----|---|---|----------|-----------|----------|
| 46 | 1 | 0 | 4.788558 | -0.678387 | 3.034139 |
| 47 | 1 | 0 | 3.937127 | 3.299489  | 1.643224 |
| 48 | 1 | 0 | 5.549291 | 1.628856  | 2.521096 |

-----

**P(RSR)**

SCF Done: E(RM062X) = -1244.02583319

-----

| Center<br>Number | Atomic<br>Number | Atomic<br>Type | Coordinates (Angstroms) |           |           |
|------------------|------------------|----------------|-------------------------|-----------|-----------|
|                  |                  |                | X                       | Y         | Z         |
| 1                | 6                | 0              | -0.612233               | -0.636393 | -1.107271 |
| 2                | 6                | 0              | -0.236014               | -0.662845 | 0.417935  |
| 3                | 1                | 0              | -1.185057               | -0.504509 | 0.937990  |
| 4                | 6                | 0              | 0.569626                | -0.561897 | -1.971290 |
| 5                | 7                | 0              | 1.507406                | -0.468228 | -2.639807 |
| 6                | 6                | 0              | 0.287015                | -2.015930 | 0.862634  |
| 7                | 6                | 0              | 1.404001                | -2.627427 | 0.279725  |
| 8                | 6                | 0              | -0.395505               | -2.693411 | 1.877225  |
| 9                | 6                | 0              | 1.829695                | -3.880834 | 0.712463  |
| 10               | 1                | 0              | 1.954256                | -2.126879 | -0.511603 |
| 11               | 6                | 0              | 0.031073                | -3.946599 | 2.312791  |
| 12               | 1                | 0              | -1.271313               | -2.233265 | 2.328878  |
| 13               | 6                | 0              | 1.146330                | -4.543566 | 1.730872  |
| 14               | 1                | 0              | 2.699024                | -4.339712 | 0.251023  |
| 15               | 1                | 0              | -0.510806               | -4.455239 | 3.104543  |

|    |   |   |           |           |           |
|----|---|---|-----------|-----------|-----------|
| 16 | 1 | 0 | 1.481379  | -5.520338 | 2.066730  |
| 17 | 6 | 0 | -1.451905 | -1.867512 | -1.478765 |
| 18 | 8 | 0 | -0.985540 | -2.733099 | -2.188553 |
| 19 | 6 | 0 | -2.824580 | -1.972076 | -0.904189 |
| 20 | 6 | 0 | -3.462442 | -3.215906 | -0.984089 |
| 21 | 6 | 0 | -3.486357 | -0.889802 | -0.311634 |
| 22 | 6 | 0 | -4.744100 | -3.378295 | -0.474113 |
| 23 | 1 | 0 | -2.938447 | -4.045646 | -1.447733 |
| 24 | 6 | 0 | -4.773163 | -1.054799 | 0.193233  |
| 25 | 1 | 0 | -3.016624 | 0.088120  | -0.245306 |
| 26 | 6 | 0 | -5.400298 | -2.296687 | 0.115256  |
| 27 | 1 | 0 | -5.232877 | -4.345700 | -0.534837 |
| 28 | 1 | 0 | -5.284076 | -0.212071 | 0.647989  |
| 29 | 1 | 0 | -6.402232 | -2.422372 | 0.514682  |
| 30 | 6 | 0 | 0.656179  | 0.518819  | 0.754694  |
| 31 | 6 | 0 | 1.929950  | 0.448132  | 1.143231  |
| 32 | 1 | 0 | -1.193818 | 0.272276  | -1.301201 |
| 33 | 1 | 0 | 2.442964  | -0.498969 | 1.270647  |
| 34 | 1 | 0 | 2.483705  | 1.357042  | 1.357643  |
| 35 | 6 | 0 | 0.066782  | 1.892318  | 0.646106  |
| 36 | 8 | 0 | 0.682507  | 2.925384  | 0.690154  |
| 37 | 8 | 0 | -1.284772 | 1.834581  | 0.496105  |
| 38 | 6 | 0 | -1.989508 | 3.028120  | 0.328303  |
| 39 | 6 | 0 | -2.639294 | 3.219581  | -0.883344 |
| 40 | 6 | 0 | -2.081778 | 3.945333  | 1.367924  |
| 41 | 6 | 0 | -3.403841 | 4.371061  | -1.060317 |

|    |   |   |           |          |           |
|----|---|---|-----------|----------|-----------|
| 42 | 1 | 0 | -2.541237 | 2.476401 | -1.669467 |
| 43 | 6 | 0 | -2.845806 | 5.093390 | 1.175613  |
| 44 | 1 | 0 | -1.565717 | 3.760248 | 2.304370  |
| 45 | 6 | 0 | -3.506138 | 5.308327 | -0.034213 |
| 46 | 1 | 0 | -3.916980 | 4.532927 | -2.003194 |
| 47 | 1 | 0 | -2.926675 | 5.821552 | 1.976849  |
| 48 | 1 | 0 | -4.099858 | 6.206075 | -0.176112 |

-----

**P(SRS)**

SCF Done: E(RM062X) = -1244.02543707

-----

| Center<br>Number | Atomic<br>Number | Atomic<br>Type | Coordinates (Angstroms) |          |           |
|------------------|------------------|----------------|-------------------------|----------|-----------|
|                  |                  |                | X                       | Y        | Z         |
| 1                | 6                | 0              | -0.099322               | 0.734547 | -0.996895 |
| 2                | 6                | 0              | -0.276488               | 0.998362 | 0.534737  |
| 3                | 1                | 0              | -1.324951               | 0.764418 | 0.738016  |
| 4                | 6                | 0              | 1.306602                | 0.764008 | -1.411602 |
| 5                | 7                | 0              | 2.421630                | 0.760779 | -1.714615 |
| 6                | 6                | 0              | -0.066193               | 2.437952 | 0.972699  |
| 7                | 6                | 0              | 0.843346                | 3.316171 | 0.377738  |
| 8                | 6                | 0              | -0.821082               | 2.888649 | 2.062125  |
| 9                | 6                | 0              | 0.991992                | 4.615278 | 0.865771  |
| 10               | 1                | 0              | 1.439781                | 3.007234 | -0.474691 |
| 11               | 6                | 0              | -0.671867               | 4.181979 | 2.550916  |



|    |   |   |           |           |           |
|----|---|---|-----------|-----------|-----------|
| 12 | 1 | 0 | -1.534808 | 2.212269  | 2.527101  |
| 13 | 6 | 0 | 0.238652  | 5.051655  | 1.951681  |
| 14 | 1 | 0 | 1.701505  | 5.285964  | 0.390182  |
| 15 | 1 | 0 | -1.269736 | 4.511273  | 3.395566  |
| 16 | 1 | 0 | 0.356600  | 6.063504  | 2.327665  |
| 17 | 6 | 0 | -0.923292 | 1.720288  | -1.839468 |
| 18 | 8 | 0 | -0.369282 | 2.557612  | -2.519926 |
| 19 | 6 | 0 | -2.409913 | 1.627662  | -1.758777 |
| 20 | 6 | 0 | -3.074268 | 0.508096  | -1.243914 |
| 21 | 6 | 0 | -3.151296 | 2.711483  | -2.244463 |
| 22 | 6 | 0 | -4.465460 | 0.476998  | -1.217467 |
| 23 | 1 | 0 | -2.522265 | -0.350546 | -0.871190 |
| 24 | 6 | 0 | -4.539378 | 2.680573  | -2.208634 |
| 25 | 1 | 0 | -2.623822 | 3.572591  | -2.642739 |
| 26 | 6 | 0 | -5.197448 | 1.561934  | -1.695577 |
| 27 | 1 | 0 | -4.975199 | -0.396360 | -0.822845 |
| 28 | 1 | 0 | -5.110013 | 3.526676  | -2.578874 |
| 29 | 1 | 0 | -6.282785 | 1.536500  | -1.668973 |
| 30 | 6 | 0 | 0.565364  | 0.005063  | 1.318203  |
| 31 | 6 | 0 | 1.733324  | 0.292830  | 1.894478  |
| 32 | 1 | 0 | -0.451911 | -0.285229 | -1.192900 |
| 33 | 1 | 0 | 2.152606  | 1.294235  | 1.863668  |
| 34 | 1 | 0 | 2.291530  | -0.478130 | 2.416700  |
| 35 | 6 | 0 | 0.080652  | -1.406034 | 1.428520  |
| 36 | 8 | 0 | 0.648002  | -2.300453 | 2.000596  |
| 37 | 8 | 0 | -1.109853 | -1.566304 | 0.788154  |

|    |   |   |           |           |           |
|----|---|---|-----------|-----------|-----------|
| 38 | 6 | 0 | -1.731018 | -2.814917 | 0.832760  |
| 39 | 6 | 0 | -2.202371 | -3.318787 | 2.039378  |
| 40 | 6 | 0 | -1.924446 | -3.480928 | -0.369322 |
| 41 | 6 | 0 | -2.882774 | -4.533229 | 2.033629  |
| 42 | 1 | 0 | -2.039056 | -2.767131 | 2.959698  |
| 43 | 6 | 0 | -2.612077 | -4.693545 | -0.360563 |
| 44 | 1 | 0 | -1.541312 | -3.052162 | -1.290537 |
| 45 | 6 | 0 | -3.089613 | -5.220734 | 0.837476  |
| 46 | 1 | 0 | -3.257012 | -4.939485 | 2.968197  |
| 47 | 1 | 0 | -2.773219 | -5.223112 | -1.294444 |
| 48 | 1 | 0 | -3.625318 | -6.164796 | 0.840181  |

-----

**P(SSR)**

SCF Done: E(RM062X) = -1244.02423924

-----

| Center<br>Number | Atomic<br>Number | Atomic<br>Type | Coordinates (Angstroms) |           |           |
|------------------|------------------|----------------|-------------------------|-----------|-----------|
|                  |                  |                | X                       | Y         | Z         |
| 1                | 6                | 0              | -0.237683               | 0.179567  | 0.894360  |
| 2                | 6                | 0              | 0.863136                | 0.067290  | 1.640030  |
| 3                | 1                | 0              | -1.572720               | 0.683048  | -1.611776 |
| 4                | 1                | 0              | 1.556353                | 0.896326  | 1.752027  |
| 5                | 1                | 0              | 1.090362                | -0.860942 | 2.155508  |
| 6                | 6                | 0              | -1.106432               | -1.031621 | 0.773233  |
| 7                | 8                | 0              | -0.867298               | -2.111328 | 1.250198  |

|    |   |   |           |           |           |
|----|---|---|-----------|-----------|-----------|
| 8  | 8 | 0 | -2.220941 | -0.765370 | 0.049238  |
| 9  | 6 | 0 | -3.058979 | -1.828456 | -0.285186 |
| 10 | 6 | 0 | -4.336742 | -1.853084 | 0.253985  |
| 11 | 6 | 0 | -2.622092 | -2.780647 | -1.198401 |
| 12 | 6 | 0 | -5.205106 | -2.872898 | -0.134399 |
| 13 | 1 | 0 | -4.639033 | -1.082813 | 0.956780  |
| 14 | 6 | 0 | -3.497728 | -3.795807 | -1.572425 |
| 15 | 1 | 0 | -1.618079 | -2.710368 | -1.605249 |
| 16 | 6 | 0 | -4.787483 | -3.843925 | -1.042209 |
| 17 | 1 | 0 | -6.209651 | -2.905521 | 0.276149  |
| 18 | 1 | 0 | -3.171101 | -4.548223 | -2.283814 |
| 19 | 1 | 0 | -5.466762 | -4.636565 | -1.340274 |
| 20 | 6 | 0 | -0.665062 | 1.241120  | -1.370331 |
| 21 | 6 | 0 | -0.589601 | 1.468163  | 0.169336  |
| 22 | 1 | 0 | 0.249890  | 2.145433  | 0.356915  |
| 23 | 6 | 0 | -0.742921 | 2.512681  | -2.093839 |
| 24 | 7 | 0 | -0.823285 | 3.513568  | -2.666757 |
| 25 | 6 | 0 | -1.831518 | 2.135913  | 0.753952  |
| 26 | 6 | 0 | -3.062896 | 2.206145  | 0.100544  |
| 27 | 6 | 0 | -1.711718 | 2.699749  | 2.028993  |
| 28 | 6 | 0 | -4.151502 | 2.829430  | 0.711738  |
| 29 | 1 | 0 | -3.195820 | 1.772941  | -0.886654 |
| 30 | 6 | 0 | -2.796557 | 3.318867  | 2.640936  |
| 31 | 1 | 0 | -0.754858 | 2.647468  | 2.544519  |
| 32 | 6 | 0 | -4.023496 | 3.385498  | 1.981661  |
| 33 | 1 | 0 | -5.102122 | 2.877057  | 0.188731  |

|    |   |   |           |           |           |
|----|---|---|-----------|-----------|-----------|
| 34 | 1 | 0 | -2.682743 | 3.752151  | 3.630234  |
| 35 | 1 | 0 | -4.872640 | 3.869570  | 2.454630  |
| 36 | 6 | 0 | 0.479985  | 0.316506  | -1.833265 |
| 37 | 8 | 0 | 0.202386  | -0.854607 | -2.000831 |
| 38 | 6 | 0 | 1.875943  | 0.811418  | -1.989553 |
| 39 | 6 | 0 | 2.275159  | 2.112966  | -1.662655 |
| 40 | 6 | 0 | 2.825282  | -0.102424 | -2.468405 |
| 41 | 6 | 0 | 3.605885  | 2.491870  | -1.817731 |
| 42 | 1 | 0 | 1.568185  | 2.843276  | -1.284218 |
| 43 | 6 | 0 | 4.149534  | 0.280711  | -2.627441 |
| 44 | 1 | 0 | 2.506004  | -1.110057 | -2.713892 |
| 45 | 6 | 0 | 4.541476  | 1.580317  | -2.301586 |
| 46 | 1 | 0 | 3.908882  | 3.501638  | -1.560038 |
| 47 | 1 | 0 | 4.877733  | -0.430475 | -3.004495 |
| 48 | 1 | 0 | 5.577651  | 1.881322  | -2.424564 |

---

## Part 2 In the presence of PhOH

### PhOH

SCF Done: E(RM062X) = -307.343025435

---

| Center<br>Number | Atomic<br>Number | Atomic<br>Type | Coordinates (Angstroms) |           |           |
|------------------|------------------|----------------|-------------------------|-----------|-----------|
|                  |                  |                | X                       | Y         | Z         |
| 1                | 6                | 0              | -1.805105               | 0.669198  | -0.008904 |
| 2                | 6                | 0              | -0.414454               | 0.646723  | -0.011158 |
| 3                | 6                | 0              | 0.295361                | 1.849965  | -0.015936 |
| 4                | 6                | 0              | -0.387306               | 3.067824  | -0.018572 |
| 5                | 6                | 0              | -1.780533               | 3.075462  | -0.016283 |
| 6                | 6                | 0              | -2.497430               | 1.880724  | -0.011485 |
| 7                | 1                | 0              | -2.351721               | -0.269535 | -0.005016 |
| 8                | 1                | 0              | 0.136296                | -0.288954 | -0.009058 |
| 9                | 1                | 0              | 0.173169                | 3.999752  | -0.022416 |
| 10               | 1                | 0              | -2.305557               | 4.026435  | -0.018464 |
| 11               | 1                | 0              | -3.582717               | 1.892204  | -0.009742 |
| 12               | 8                | 0              | 1.652849                | 1.775586  | -0.017849 |
| 13               | 1                | 0              | 2.022135                | 2.675457  | -0.019933 |

---

### R<sub>1</sub>\_PhOH

SCF Done: E(RM062X) = -805.364840277

| Center<br>Number | Atomic<br>Number | Atomic<br>Type | Coordinates (Angstroms) |           |           |
|------------------|------------------|----------------|-------------------------|-----------|-----------|
|                  |                  |                | X                       | Y         | Z         |
| 1                | 6                | 0              | -3.168116               | -0.770938 | -0.609704 |
| 2                | 6                | 0              | -4.394306               | -0.737807 | -0.092253 |
| 3                | 1                | 0              | -2.915211               | -1.349023 | -1.492096 |
| 4                | 1                | 0              | -5.207700               | -1.300399 | -0.539349 |
| 5                | 1                | 0              | -4.613756               | -0.142773 | 0.790090  |
| 6                | 6                | 0              | -2.082623               | 0.016903  | 0.010865  |
| 7                | 8                | 0              | -2.195307               | 0.695022  | 1.011640  |
| 8                | 8                | 0              | -0.942119               | -0.105191 | -0.693841 |
| 9                | 6                | 0              | 0.193399                | 0.597326  | -0.287637 |
| 10               | 6                | 0              | 0.795122                | 0.332553  | 0.935919  |
| 11               | 6                | 0              | 0.728042                | 1.507225  | -1.191382 |
| 12               | 6                | 0              | 1.960109                | 1.022472  | 1.265656  |
| 13               | 1                | 0              | 0.359389                | -0.393691 | 1.614743  |
| 14               | 6                | 0              | 1.896990                | 2.183539  | -0.851118 |
| 15               | 1                | 0              | 0.229162                | 1.674843  | -2.140592 |
| 16               | 6                | 0              | 2.509814                | 1.947794  | 0.379232  |
| 17               | 1                | 0              | 2.434565                | 0.837954  | 2.224883  |
| 18               | 1                | 0              | 2.322903                | 2.899941  | -1.546804 |
| 19               | 1                | 0              | 3.414274                | 2.485028  | 0.647466  |
| 20               | 6                | 0              | -0.228089               | 3.173716  | 2.523091  |
| 21               | 6                | 0              | -0.638089               | 3.693455  | 1.291205  |
| 22               | 6                | 0              | -0.051663               | 4.858099  | 0.802106  |

|    |   |   |           |          |           |
|----|---|---|-----------|----------|-----------|
| 23 | 6 | 0 | 0.930599  | 5.522557 | 1.534541  |
| 24 | 6 | 0 | 1.321861  | 5.007898 | 2.771240  |
| 25 | 6 | 0 | 0.751574  | 3.839442 | 3.267033  |
| 26 | 1 | 0 | -1.403869 | 3.175516 | 0.719921  |
| 27 | 1 | 0 | -0.371240 | 5.247402 | -0.160858 |
| 28 | 1 | 0 | 1.382292  | 6.431257 | 1.149278  |
| 29 | 1 | 0 | 2.085037  | 5.516214 | 3.354091  |
| 30 | 1 | 0 | 1.059564  | 3.422937 | 4.221713  |
| 31 | 8 | 0 | -0.752655 | 2.033743 | 3.033251  |
| 32 | 1 | 0 | -1.248104 | 1.570453 | 2.328914  |

-----

**R<sub>2</sub>\_PhOH**

SCF Done: E(RM062X) = -1053.34287005

-----

| Center<br>Number | Atomic<br>Number | Atomic<br>Type | Coordinates (Angstroms) |           |           |
|------------------|------------------|----------------|-------------------------|-----------|-----------|
|                  |                  |                | X                       | Y         | Z         |
| 1                | 6                | 0              | -1.666540               | 0.821841  | 0.151510  |
| 2                | 6                | 0              | -1.848189               | -0.384086 | 0.745574  |
| 3                | 1                | 0              | -1.000169               | -1.064256 | 0.697772  |
| 4                | 6                | 0              | -2.710876               | 1.795591  | -0.006104 |
| 5                | 7                | 0              | -3.534504               | 2.595459  | -0.153677 |
| 6                | 6                | 0              | -3.026466               | -0.937327 | 1.402270  |
| 7                | 6                | 0              | -4.088158               | -0.163813 | 1.901771  |
| 8                | 6                | 0              | -3.068010               | -2.333593 | 1.557203  |

|    |   |   |           |           |           |
|----|---|---|-----------|-----------|-----------|
| 9  | 6 | 0 | -5.170124 | -0.781245 | 2.515966  |
| 10 | 1 | 0 | -4.061189 | 0.918088  | 1.839856  |
| 11 | 6 | 0 | -4.159782 | -2.947477 | 2.157832  |
| 12 | 1 | 0 | -2.237202 | -2.931977 | 1.192499  |
| 13 | 6 | 0 | -5.213409 | -2.170922 | 2.637304  |
| 14 | 1 | 0 | -5.981084 | -0.175327 | 2.907746  |
| 15 | 1 | 0 | -4.184824 | -4.027642 | 2.260964  |
| 16 | 1 | 0 | -6.063966 | -2.646554 | 3.116182  |
| 17 | 6 | 0 | -0.391304 | 1.196940  | -0.517115 |
| 18 | 8 | 0 | -0.388869 | 2.126202  | -1.318837 |
| 19 | 6 | 0 | 0.870052  | 0.470645  | -0.204769 |
| 20 | 6 | 0 | 1.251291  | 0.214462  | 1.117088  |
| 21 | 6 | 0 | 1.749299  | 0.193698  | -1.256818 |
| 22 | 6 | 0 | 2.518389  | -0.296929 | 1.381985  |
| 23 | 1 | 0 | 0.578503  | 0.453106  | 1.935936  |
| 24 | 6 | 0 | 3.005600  | -0.336737 | -0.986957 |
| 25 | 1 | 0 | 1.449382  | 0.409273  | -2.278125 |
| 26 | 6 | 0 | 3.394113  | -0.571245 | 0.332345  |
| 27 | 1 | 0 | 2.823945  | -0.474520 | 2.408390  |
| 28 | 1 | 0 | 3.686788  | -0.554790 | -1.803716 |
| 29 | 1 | 0 | 4.382440  | -0.969734 | 0.541766  |
| 30 | 6 | 0 | 4.349823  | 3.194943  | -1.757960 |
| 31 | 6 | 0 | 3.007646  | 3.178860  | -1.367477 |
| 32 | 6 | 0 | 2.679533  | 3.238404  | -0.008945 |
| 33 | 6 | 0 | 3.690955  | 3.285166  | 0.946833  |
| 34 | 6 | 0 | 5.031583  | 3.293496  | 0.564090  |



|    |   |   |          |          |           |
|----|---|---|----------|----------|-----------|
| 35 | 6 | 0 | 5.351221 | 3.255531 | -0.793432 |
| 36 | 1 | 0 | 4.588440 | 3.150185 | -2.816501 |
| 37 | 1 | 0 | 1.634728 | 3.243650 | 0.291377  |
| 38 | 1 | 0 | 3.423853 | 3.317565 | 1.999706  |
| 39 | 1 | 0 | 5.816592 | 3.332357 | 1.312830  |
| 40 | 1 | 0 | 6.391360 | 3.264682 | -1.107261 |
| 41 | 8 | 0 | 2.064350 | 3.102006 | -2.337374 |
| 42 | 1 | 0 | 1.202041 | 2.851510 | -1.943478 |

-----

**TSR<sub>1</sub>/1\_PhOH**

SCF Done: E(RM062X) = -1150.55147435

Imaginary Frequencies = -155.4593

-----

| Center<br>Number | Atomic<br>Number | Atomic<br>Type | Coordinates (Angstroms) |           |          |
|------------------|------------------|----------------|-------------------------|-----------|----------|
|                  |                  |                | X                       | Y         | Z        |
| 1                | 6                | 0              | -1.697507               | -2.071007 | 2.245081 |
| 2                | 6                | 0              | -2.777918               | -2.569353 | 1.580553 |
| 3                | 1                | 0              | -1.587834               | -2.146178 | 3.320645 |
| 4                | 1                | 0              | -3.489319               | -3.213982 | 2.087777 |
| 5                | 1                | 0              | -2.768802               | -2.612898 | 0.494848 |
| 6                | 6                | 0              | -0.672990               | -1.377551 | 1.506645 |
| 7                | 8                | 0              | -0.657236               | -1.159174 | 0.300835 |
| 8                | 8                | 0              | 0.346191                | -0.960995 | 2.320870 |
| 9                | 6                | 0              | 1.496270                | -0.429263 | 1.756293 |

|    |   |   |           |           |           |
|----|---|---|-----------|-----------|-----------|
| 10 | 6 | 0 | 1.962247  | 0.774527  | 2.274030  |
| 11 | 6 | 0 | 2.203811  | -1.115429 | 0.772299  |
| 12 | 6 | 0 | 3.156020  | 1.306352  | 1.789477  |
| 13 | 1 | 0 | 1.391978  | 1.278302  | 3.048815  |
| 14 | 6 | 0 | 3.391505  | -0.570469 | 0.293121  |
| 15 | 1 | 0 | 1.826333  | -2.057308 | 0.389886  |
| 16 | 6 | 0 | 3.870595  | 0.638896  | 0.797152  |
| 17 | 1 | 0 | 3.524538  | 2.245531  | 2.190618  |
| 18 | 1 | 0 | 3.945930  | -1.097956 | -0.477172 |
| 19 | 1 | 0 | 4.798563  | 1.056191  | 0.418901  |
| 20 | 6 | 0 | -6.421399 | -0.232849 | 0.310099  |
| 21 | 6 | 0 | -5.371583 | -1.384278 | 0.359345  |
| 22 | 1 | 0 | -7.396523 | -0.578991 | 0.667417  |
| 23 | 1 | 0 | -6.545554 | 0.138095  | -0.711983 |
| 24 | 1 | 0 | -5.831267 | -2.341233 | 0.627841  |
| 25 | 1 | 0 | -4.858942 | -1.504414 | -0.600866 |
| 26 | 6 | 0 | -5.934444 | 0.419790  | 2.554866  |
| 27 | 1 | 0 | -5.556116 | 1.242279  | 3.170313  |
| 28 | 1 | 0 | -6.949906 | 0.184489  | 2.888720  |
| 29 | 6 | 0 | -5.013281 | -0.829544 | 2.663235  |
| 30 | 1 | 0 | -4.230057 | -0.695689 | 3.417903  |
| 31 | 1 | 0 | -5.582716 | -1.730490 | 2.913836  |
| 32 | 6 | 0 | -3.637784 | 0.153564  | 0.968406  |
| 33 | 1 | 0 | -2.920954 | 0.383007  | 1.764193  |
| 34 | 1 | 0 | -3.072143 | -0.073126 | 0.059250  |
| 35 | 6 | 0 | -4.651149 | 1.310214  | 0.750469  |

|    |   |   |           |           |           |
|----|---|---|-----------|-----------|-----------|
| 36 | 1 | 0 | -4.368947 | 2.196860  | 1.329198  |
| 37 | 1 | 0 | -4.695302 | 1.595696  | -0.305789 |
| 38 | 7 | 0 | -5.997392 | 0.886347  | 1.163262  |
| 39 | 7 | 0 | -4.360432 | -1.056930 | 1.369891  |
| 40 | 6 | 0 | -2.050739 | 3.236661  | -1.084183 |
| 41 | 6 | 0 | -1.411195 | 2.153025  | -0.472817 |
| 42 | 6 | 0 | -1.088429 | 2.217979  | 0.886855  |
| 43 | 6 | 0 | -1.407133 | 3.356233  | 1.623801  |
| 44 | 6 | 0 | -2.045073 | 4.438802  | 1.019596  |
| 45 | 6 | 0 | -2.362412 | 4.369083  | -0.337885 |
| 46 | 1 | 0 | -2.296434 | 3.172843  | -2.140148 |
| 47 | 1 | 0 | -0.592222 | 1.375418  | 1.361124  |
| 48 | 1 | 0 | -1.150683 | 3.392158  | 2.679224  |
| 49 | 1 | 0 | -2.291319 | 5.324269  | 1.596855  |
| 50 | 1 | 0 | -2.859726 | 5.204162  | -0.823190 |
| 51 | 8 | 0 | -1.127784 | 1.071393  | -1.235694 |
| 52 | 1 | 0 | -0.800566 | 0.339625  | -0.670019 |

---

**TSR<sub>1</sub>/1-1\_PhOH**

SCF Done: E(RM062X) = -1150.55375460

Imaginary Frequencies = -150.1906

---

| Center | Atomic | Atomic | Coordinates (Angstroms) |   |   |
|--------|--------|--------|-------------------------|---|---|
| Number | Number | Type   | X                       | Y | Z |

---

|    |   |   |           |           |           |
|----|---|---|-----------|-----------|-----------|
| 1  | 6 | 0 | -0.619218 | -2.567621 | -1.168737 |
| 2  | 6 | 0 | 0.595371  | -2.343182 | -1.748040 |
| 3  | 1 | 0 | -0.890426 | -3.530395 | -0.751462 |
| 4  | 1 | 0 | 1.243900  | -3.174809 | -2.006523 |
| 5  | 1 | 0 | 0.780779  | -1.407763 | -2.271595 |
| 6  | 6 | 0 | -1.548516 | -1.483325 | -0.994618 |
| 7  | 8 | 0 | -1.443184 | -0.323333 | -1.385209 |
| 8  | 8 | 0 | -2.669531 | -1.883899 | -0.324945 |
| 9  | 6 | 0 | -3.613700 | -0.922445 | 0.006249  |
| 10 | 6 | 0 | -4.878462 | -1.026166 | -0.557210 |
| 11 | 6 | 0 | -3.310290 | 0.068421  | 0.935623  |
| 12 | 6 | 0 | -5.863869 | -0.114473 | -0.181467 |
| 13 | 1 | 0 | -5.078738 | -1.814701 | -1.275773 |
| 14 | 6 | 0 | -4.299670 | 0.978441  | 1.296851  |
| 15 | 1 | 0 | -2.313307 | 0.118413  | 1.364353  |
| 16 | 6 | 0 | -5.576653 | 0.889523  | 0.740735  |
| 17 | 1 | 0 | -6.856550 | -0.191503 | -0.614544 |
| 18 | 1 | 0 | -4.072885 | 1.757392  | 2.018827  |
| 19 | 1 | 0 | -6.345524 | 1.599437  | 1.029637  |
| 20 | 6 | 0 | 3.078069  | -0.846778 | -0.951914 |
| 21 | 6 | 0 | 4.093531  | -0.349212 | 0.117482  |
| 22 | 1 | 0 | 3.565657  | -1.447491 | -1.727215 |
| 23 | 1 | 0 | 2.556529  | -0.016496 | -1.438362 |
| 24 | 1 | 0 | 5.085676  | -0.780115 | -0.050580 |
| 25 | 1 | 0 | 4.184584  | 0.741775  | 0.086844  |
| 26 | 6 | 0 | 2.733022  | -2.793755 | 0.401756  |

|    |   |   |           |           |           |
|----|---|---|-----------|-----------|-----------|
| 27 | 1 | 0 | 1.960475  | -3.466985 | 0.789036  |
| 28 | 1 | 0 | 3.331527  | -3.342027 | -0.332763 |
| 29 | 6 | 0 | 3.617586  | -2.206385 | 1.542018  |
| 30 | 1 | 0 | 3.222053  | -2.482348 | 2.524746  |
| 31 | 1 | 0 | 4.643081  | -2.581758 | 1.470303  |
| 32 | 6 | 0 | 2.288373  | -0.227958 | 1.672583  |
| 33 | 1 | 0 | 1.996368  | -0.429571 | 2.708091  |
| 34 | 1 | 0 | 2.306926  | 0.858963  | 1.527975  |
| 35 | 6 | 0 | 1.305297  | -0.895447 | 0.673845  |
| 36 | 1 | 0 | 0.601522  | -1.570940 | 1.173227  |
| 37 | 1 | 0 | 0.719795  | -0.157845 | 0.120445  |
| 38 | 7 | 0 | 2.067314  | -1.687695 | -0.296034 |
| 39 | 7 | 0 | 3.649948  | -0.739594 | 1.462127  |
| 40 | 6 | 0 | -0.132351 | 2.329328  | -0.038043 |
| 41 | 6 | 0 | 0.135831  | 3.184463  | 1.028145  |
| 42 | 6 | 0 | 1.355431  | 3.855480  | 1.114692  |
| 43 | 6 | 0 | 2.311431  | 3.662372  | 0.116662  |
| 44 | 6 | 0 | 2.060265  | 2.803452  | -0.950413 |
| 45 | 6 | 0 | 0.836546  | 2.131451  | -1.028790 |
| 46 | 1 | 0 | -1.081978 | 1.804220  | -0.110351 |
| 47 | 1 | 0 | -0.620432 | 3.327350  | 1.795173  |
| 48 | 1 | 0 | 1.558346  | 4.521556  | 1.947285  |
| 49 | 1 | 0 | 3.264950  | 4.180558  | 0.169359  |
| 50 | 1 | 0 | 2.800486  | 2.641743  | -1.729069 |
| 51 | 8 | 0 | 0.638178  | 1.290880  | -2.074680 |
| 52 | 1 | 0 | -0.147638 | 0.722912  | -1.901319 |

-----  
**1\_PhOH**

SCF Done: E(RM062X) = -1150.56740005  
-----

| Center<br>Number | Atomic<br>Number | Atomic<br>Type | Coordinates (Angstroms) |           |           |
|------------------|------------------|----------------|-------------------------|-----------|-----------|
|                  |                  |                | X                       | Y         | Z         |
| 1                | 6                | 0              | -0.204245               | -0.640668 | 1.380276  |
| 2                | 6                | 0              | -1.498465               | -1.316616 | 1.196459  |
| 3                | 1                | 0              | -0.005627               | -0.070652 | 2.278925  |
| 4                | 1                | 0              | -1.988449               | -1.567671 | 2.141947  |
| 5                | 1                | 0              | -1.410899               | -2.217664 | 0.581589  |
| 6                | 6                | 0              | 0.771712                | -0.755504 | 0.419507  |
| 7                | 8                | 0              | 0.733781                | -1.384444 | -0.673124 |
| 8                | 8                | 0              | 1.933747                | -0.029736 | 0.734685  |
| 9                | 6                | 0              | 3.063591                | -0.186865 | -0.022931 |
| 10               | 6                | 0              | 3.761049                | 0.973278  | -0.358491 |
| 11               | 6                | 0              | 3.569223                | -1.439954 | -0.377926 |
| 12               | 6                | 0              | 4.968842                | 0.883228  | -1.046617 |
| 13               | 1                | 0              | 3.348483                | 1.934495  | -0.067028 |
| 14               | 6                | 0              | 4.772164                | -1.516956 | -1.074611 |
| 15               | 1                | 0              | 3.018584                | -2.334672 | -0.112573 |
| 16               | 6                | 0              | 5.477898                | -0.361427 | -1.411422 |
| 17               | 1                | 0              | 5.509570                | 1.790572  | -1.299846 |
| 18               | 1                | 0              | 5.163125                | -2.491749 | -1.352497 |

|    |   |   |           |           |           |
|----|---|---|-----------|-----------|-----------|
| 19 | 1 | 0 | 6.417093  | -0.432391 | -1.951457 |
| 20 | 6 | 0 | -4.925984 | -0.410550 | -0.313812 |
| 21 | 6 | 0 | -3.814676 | -1.313455 | 0.272863  |
| 22 | 1 | 0 | -5.668470 | -0.170676 | 0.452287  |
| 23 | 1 | 0 | -5.431087 | -0.930027 | -1.131851 |
| 24 | 1 | 0 | -4.076713 | -1.717187 | 1.253259  |
| 25 | 1 | 0 | -3.547505 | -2.135818 | -0.395154 |
| 26 | 6 | 0 | -3.853672 | 1.617950  | 0.322563  |
| 27 | 1 | 0 | -3.309781 | 2.481766  | -0.069516 |
| 28 | 1 | 0 | -4.696717 | 1.981329  | 0.915609  |
| 29 | 6 | 0 | -2.927557 | 0.751615  | 1.208772  |
| 30 | 1 | 0 | -1.989950 | 1.253981  | 1.452907  |
| 31 | 1 | 0 | -3.414059 | 0.421984  | 2.130424  |
| 32 | 6 | 0 | -2.072488 | -0.097149 | -0.912192 |
| 33 | 1 | 0 | -1.246091 | 0.596047  | -0.750702 |
| 34 | 1 | 0 | -1.683721 | -1.004856 | -1.374335 |
| 35 | 6 | 0 | -3.238795 | 0.533325  | -1.705042 |
| 36 | 1 | 0 | -2.902446 | 1.452854  | -2.191398 |
| 37 | 1 | 0 | -3.591726 | -0.154855 | -2.479619 |
| 38 | 7 | 0 | -4.362975 | 0.845685  | -0.815495 |
| 39 | 7 | 0 | -2.574625 | -0.487898 | 0.446880  |
| 40 | 6 | 0 | -0.747125 | 0.642502  | -4.609916 |
| 41 | 6 | 0 | -0.230989 | -0.214740 | -3.629319 |
| 42 | 6 | 0 | -0.563637 | -1.577140 | -3.663569 |
| 43 | 6 | 0 | -1.407929 | -2.061629 | -4.659505 |
| 44 | 6 | 0 | -1.925217 | -1.209618 | -5.634955 |

|    |   |   |           |           |           |
|----|---|---|-----------|-----------|-----------|
| 45 | 6 | 0 | -1.585763 | 0.143576  | -5.601938 |
| 46 | 1 | 0 | -0.482149 | 1.695323  | -4.574504 |
| 47 | 1 | 0 | -0.162531 | -2.238744 | -2.900124 |
| 48 | 1 | 0 | -1.660703 | -3.118468 | -4.671286 |
| 49 | 1 | 0 | -2.582797 | -1.593530 | -6.408432 |
| 50 | 1 | 0 | -1.979785 | 0.821443  | -6.354245 |
| 51 | 8 | 0 | 0.572270  | 0.308107  | -2.681713 |
| 52 | 1 | 0 | 0.730851  | -0.366350 | -1.958877 |

-----

### 1-1\_PhOH

SCF Done: E(RM062X) = -1150.56880203

-----

| Center<br>Number | Atomic<br>Number | Atomic<br>Type | Coordinates (Angstroms) |           |           |
|------------------|------------------|----------------|-------------------------|-----------|-----------|
|                  |                  |                | X                       | Y         | Z         |
| 1                | 6                | 0              | -0.303152               | -1.455988 | 0.035536  |
| 2                | 6                | 0              | 0.844370                | -1.294436 | -0.868185 |
| 3                | 1                | 0              | -0.178668               | -1.887142 | 1.020698  |
| 4                | 1                | 0              | 1.610752                | -2.067777 | -0.759121 |
| 5                | 1                | 0              | 0.530891                | -1.253078 | -1.914737 |
| 6                | 6                | 0              | -1.554299               | -1.063929 | -0.379288 |
| 7                | 8                | 0              | -1.925694               | -0.540747 | -1.464397 |
| 8                | 8                | 0              | -2.557813               | -1.352718 | 0.562070  |
| 9                | 6                | 0              | -3.720624               | -0.632417 | 0.525737  |
| 10               | 6                | 0              | -4.909348               | -1.325947 | 0.744012  |



|    |   |   |           |           |           |
|----|---|---|-----------|-----------|-----------|
| 11 | 6 | 0 | -3.734655 | 0.756492  | 0.370230  |
| 12 | 6 | 0 | -6.116178 | -0.631631 | 0.803880  |
| 13 | 1 | 0 | -4.872563 | -2.404082 | 0.867365  |
| 14 | 6 | 0 | -4.946547 | 1.438490  | 0.420524  |
| 15 | 1 | 0 | -2.802231 | 1.288513  | 0.210442  |
| 16 | 6 | 0 | -6.141859 | 0.751319  | 0.637117  |
| 17 | 1 | 0 | -7.039001 | -1.177706 | 0.977612  |
| 18 | 1 | 0 | -4.954864 | 2.517617  | 0.294959  |
| 19 | 1 | 0 | -7.083020 | 1.290933  | 0.677744  |
| 20 | 6 | 0 | 2.498878  | 0.244276  | -1.906165 |
| 21 | 6 | 0 | 3.457960  | 1.423490  | -1.631162 |
| 22 | 1 | 0 | 3.026605  | -0.691846 | -2.103337 |
| 23 | 1 | 0 | 1.805012  | 0.445102  | -2.726569 |
| 24 | 1 | 0 | 4.471169  | 1.062568  | -1.434135 |
| 25 | 1 | 0 | 3.488556  | 2.081403  | -2.503805 |
| 26 | 6 | 0 | 2.543292  | -0.049535 | 0.512038  |
| 27 | 1 | 0 | 1.928453  | -0.373085 | 1.354925  |
| 28 | 1 | 0 | 3.294857  | -0.813063 | 0.297981  |
| 29 | 6 | 0 | 3.166197  | 1.351409  | 0.730963  |
| 30 | 1 | 0 | 2.683029  | 1.860412  | 1.569220  |
| 31 | 1 | 0 | 4.230239  | 1.248011  | 0.958219  |
| 32 | 6 | 0 | 1.579551  | 2.487352  | -0.637143 |
| 33 | 1 | 0 | 1.265917  | 3.209489  | 0.121285  |
| 34 | 1 | 0 | 1.439847  | 2.941754  | -1.623794 |
| 35 | 6 | 0 | 0.737520  | 1.202135  | -0.506872 |
| 36 | 1 | 0 | 0.289731  | 1.094870  | 0.481478  |

|    |   |   |           |           |           |
|----|---|---|-----------|-----------|-----------|
| 37 | 1 | 0 | -0.050120 | 1.122668  | -1.253526 |
| 38 | 7 | 0 | 1.649877  | 0.023596  | -0.687314 |
| 39 | 7 | 0 | 3.006125  | 2.187587  | -0.464535 |
| 40 | 6 | 0 | -1.668511 | 2.321351  | -2.907847 |
| 41 | 6 | 0 | -1.753877 | 3.706953  | -3.019148 |
| 42 | 6 | 0 | -0.877253 | 4.412889  | -3.842395 |
| 43 | 6 | 0 | 0.093626  | 3.713370  | -4.560207 |
| 44 | 6 | 0 | 0.196260  | 2.329024  | -4.453538 |
| 45 | 6 | 0 | -0.684734 | 1.625153  | -3.623789 |
| 46 | 1 | 0 | -2.346777 | 1.763388  | -2.266493 |
| 47 | 1 | 0 | -2.518110 | 4.237161  | -2.457230 |
| 48 | 1 | 0 | -0.950291 | 5.492683  | -3.925701 |
| 49 | 1 | 0 | 0.781895  | 4.249784  | -5.207764 |
| 50 | 1 | 0 | 0.952787  | 1.776659  | -5.004103 |
| 51 | 8 | 0 | -0.539875 | 0.284305  | -3.528142 |
| 52 | 1 | 0 | -1.092910 | -0.071753 | -2.769735 |

-----

**TS1/2\_PhOH(RRS)**

SCF Done: E(RM062X) = -1896.55709539

Imaginary Frequencies = -119.7886

-----

| Center<br>Number | Atomic<br>Number | Atomic<br>Type | Coordinates (Angstroms) |           |          |
|------------------|------------------|----------------|-------------------------|-----------|----------|
|                  |                  |                | X                       | Y         | Z        |
| 1                | 6                | 0              | -0.775208               | -0.890555 | 0.575483 |

-----

|    |   |   |           |           |           |
|----|---|---|-----------|-----------|-----------|
| 2  | 6 | 0 | 0.447572  | -0.568397 | -0.163949 |
| 3  | 1 | 0 | -0.737579 | -1.176141 | 1.619353  |
| 4  | 1 | 0 | 1.181380  | -0.018474 | 0.438702  |
| 5  | 1 | 0 | 0.217723  | 0.000199  | -1.071622 |
| 6  | 6 | 0 | -1.985428 | -0.978409 | -0.125748 |
| 7  | 8 | 0 | -2.199039 | -0.731801 | -1.316665 |
| 8  | 8 | 0 | -3.023116 | -1.381628 | 0.725046  |
| 9  | 6 | 0 | -4.332440 | -1.464803 | 0.341492  |
| 10 | 6 | 0 | -5.112138 | -2.311419 | 1.136825  |
| 11 | 6 | 0 | -4.933281 | -0.733227 | -0.689790 |
| 12 | 6 | 0 | -6.478131 | -2.432830 | 0.907476  |
| 13 | 1 | 0 | -4.626175 | -2.859014 | 1.938787  |
| 14 | 6 | 0 | -6.303308 | -0.871349 | -0.910770 |
| 15 | 1 | 0 | -4.336563 | -0.075817 | -1.304875 |
| 16 | 6 | 0 | -7.084083 | -1.714170 | -0.122333 |
| 17 | 1 | 0 | -7.069675 | -3.091151 | 1.537338  |
| 18 | 1 | 0 | -6.764135 | -0.301833 | -1.713398 |
| 19 | 1 | 0 | -8.149947 | -1.807697 | -0.306224 |
| 20 | 6 | 0 | 3.335667  | -2.399034 | -1.897662 |
| 21 | 6 | 0 | 2.368633  | -1.239632 | -1.570931 |
| 22 | 1 | 0 | 4.269029  | -2.286255 | -1.337685 |
| 23 | 1 | 0 | 3.569743  | -2.396645 | -2.965229 |
| 24 | 1 | 0 | 2.860710  | -0.424096 | -1.035626 |
| 25 | 1 | 0 | 1.874594  | -0.839314 | -2.460201 |
| 26 | 6 | 0 | 2.615844  | -3.750407 | -0.077471 |
| 27 | 1 | 0 | 2.063226  | -4.657272 | 0.182446  |

|    |   |   |           |           |           |
|----|---|---|-----------|-----------|-----------|
| 28 | 1 | 0 | 3.616327  | -3.818196 | 0.359147  |
| 29 | 6 | 0 | 1.894451  | -2.496942 | 0.470296  |
| 30 | 1 | 0 | 1.083568  | -2.743660 | 1.158441  |
| 31 | 1 | 0 | 2.576780  | -1.792737 | 0.954190  |
| 32 | 6 | 0 | 0.442050  | -2.723257 | -1.472769 |
| 33 | 1 | 0 | -0.256670 | -3.175859 | -0.767534 |
| 34 | 1 | 0 | -0.123671 | -2.136075 | -2.199019 |
| 35 | 6 | 0 | 1.392043  | -3.758084 | -2.123705 |
| 36 | 1 | 0 | 0.992850  | -4.765328 | -1.980787 |
| 37 | 1 | 0 | 1.481491  | -3.573030 | -3.197693 |
| 38 | 7 | 0 | 2.734064  | -3.685699 | -1.536666 |
| 39 | 7 | 0 | 1.278392  | -1.762182 | -0.681737 |
| 40 | 6 | 0 | 0.091308  | 2.221317  | 1.259418  |
| 41 | 6 | 0 | -1.156635 | 1.713117  | 0.986076  |
| 42 | 1 | 0 | -1.437213 | 1.678304  | -0.063664 |
| 43 | 6 | 0 | 0.617390  | 2.324561  | 2.586794  |
| 44 | 7 | 0 | 1.086357  | 2.423458  | 3.642883  |
| 45 | 6 | 0 | -2.270033 | 1.474764  | 1.910611  |
| 46 | 6 | 0 | -2.125235 | 1.125231  | 3.262420  |
| 47 | 6 | 0 | -3.560962 | 1.598816  | 1.377960  |
| 48 | 6 | 0 | -3.248715 | 0.916417  | 4.052538  |
| 49 | 1 | 0 | -1.139829 | 0.979153  | 3.691310  |
| 50 | 6 | 0 | -4.683977 | 1.401916  | 2.174830  |
| 51 | 1 | 0 | -3.677204 | 1.849397  | 0.326008  |
| 52 | 6 | 0 | -4.530124 | 1.058333  | 3.515369  |
| 53 | 1 | 0 | -3.125138 | 0.632736  | 5.093383  |

|    |   |   |           |           |           |
|----|---|---|-----------|-----------|-----------|
| 54 | 1 | 0 | -5.675890 | 1.499010  | 1.742779  |
| 55 | 1 | 0 | -5.402778 | 0.889745  | 4.139444  |
| 56 | 6 | 0 | 1.070607  | 2.572095  | 0.215975  |
| 57 | 8 | 0 | 2.274662  | 2.625221  | 0.484657  |
| 58 | 6 | 0 | 0.630373  | 2.877822  | -1.176318 |
| 59 | 6 | 0 | 1.471328  | 2.473571  | -2.220249 |
| 60 | 6 | 0 | -0.536119 | 3.595604  | -1.459798 |
| 61 | 6 | 0 | 1.131270  | 2.754404  | -3.538119 |
| 62 | 1 | 0 | 2.383753  | 1.931687  | -1.984846 |
| 63 | 6 | 0 | -0.862018 | 3.893810  | -2.780624 |
| 64 | 1 | 0 | -1.173911 | 3.941748  | -0.651447 |
| 65 | 6 | 0 | -0.036017 | 3.466418  | -3.818358 |
| 66 | 1 | 0 | 1.776731  | 2.425395  | -4.346750 |
| 67 | 1 | 0 | -1.760784 | 4.462165  | -2.998509 |
| 68 | 1 | 0 | -0.297957 | 3.693094  | -4.847540 |
| 69 | 6 | 0 | 6.261004  | -1.415104 | 0.570060  |
| 70 | 6 | 0 | 6.680838  | -0.644004 | -0.514833 |
| 71 | 6 | 0 | 6.008623  | 0.542024  | -0.805339 |
| 72 | 6 | 0 | 4.932521  | 0.962632  | -0.026335 |
| 73 | 6 | 0 | 4.511943  | 0.179999  | 1.054953  |
| 74 | 6 | 0 | 5.180894  | -1.012907 | 1.351670  |
| 75 | 1 | 0 | 6.776989  | -2.340183 | 0.812100  |
| 76 | 1 | 0 | 7.521609  | -0.962118 | -1.122952 |
| 77 | 1 | 0 | 6.323599  | 1.154746  | -1.645371 |
| 78 | 1 | 0 | 4.409736  | 1.887991  | -0.252116 |
| 79 | 1 | 0 | 4.848950  | -1.605706 | 2.199560  |

|    |   |   |          |          |          |
|----|---|---|----------|----------|----------|
| 80 | 8 | 0 | 3.458605 | 0.525948 | 1.838058 |
| 81 | 1 | 0 | 3.061441 | 1.362701 | 1.511315 |

---

**TS1/2\_PhOH(RSR)**

SCF Done: E(RM062X) = -1896.56103327

Imaginary Frequencies = -168.1450

---

| Center<br>Number | Atomic<br>Number | Atomic<br>Type | Coordinates (Angstroms) |           |           |
|------------------|------------------|----------------|-------------------------|-----------|-----------|
|                  |                  |                | X                       | Y         | Z         |
| 1                | 6                | 0              | -0.741463               | 1.170516  | -2.284742 |
| 2                | 6                | 0              | -1.449222               | 0.080995  | -1.814460 |
| 3                | 1                | 0              | -2.125856               | 0.292891  | -0.990801 |
| 4                | 6                | 0              | 0.338021                | 1.020273  | -3.207324 |
| 5                | 7                | 0              | 1.231776                | 0.915342  | -3.940794 |
| 6                | 6                | 0              | -1.678019               | -1.220428 | -2.455302 |
| 7                | 6                | 0              | -1.301082               | -1.521289 | -3.771617 |
| 8                | 6                | 0              | -2.369308               | -2.191785 | -1.709919 |
| 9                | 6                | 0              | -1.597392               | -2.767823 | -4.318527 |
| 10               | 1                | 0              | -0.795931               | -0.782784 | -4.384328 |
| 11               | 6                | 0              | -2.660436               | -3.433436 | -2.257105 |
| 12               | 1                | 0              | -2.645600               | -1.963781 | -0.681926 |
| 13               | 6                | 0              | -2.272915               | -3.725934 | -3.566503 |
| 14               | 1                | 0              | -1.305372               | -2.985671 | -5.341379 |
| 15               | 1                | 0              | -3.190784               | -4.174389 | -1.666512 |

|    |   |   |           |           |           |
|----|---|---|-----------|-----------|-----------|
| 16 | 1 | 0 | -2.502110 | -4.695153 | -3.999422 |
| 17 | 6 | 0 | -0.790368 | 2.481766  | -1.626591 |
| 18 | 8 | 0 | 0.193463  | 3.231465  | -1.632772 |
| 19 | 6 | 0 | -2.050418 | 2.959328  | -0.983682 |
| 20 | 6 | 0 | -3.320132 | 2.550082  | -1.408049 |
| 21 | 6 | 0 | -1.938584 | 3.916926  | 0.031968  |
| 22 | 6 | 0 | -4.460400 | 3.083210  | -0.811512 |
| 23 | 1 | 0 | -3.421230 | 1.838133  | -2.221653 |
| 24 | 6 | 0 | -3.077354 | 4.442178  | 0.630723  |
| 25 | 1 | 0 | -0.949350 | 4.235721  | 0.347045  |
| 26 | 6 | 0 | -4.340970 | 4.024551  | 0.209366  |
| 27 | 1 | 0 | -5.442163 | 2.767754  | -1.150930 |
| 28 | 1 | 0 | -2.981428 | 5.173575  | 1.427727  |
| 29 | 1 | 0 | -5.231927 | 4.436327  | 0.674661  |
| 30 | 6 | 0 | 0.206272  | -0.814255 | -0.115596 |
| 31 | 6 | 0 | 0.534865  | -2.211108 | -0.438865 |
| 32 | 1 | 0 | 0.815618  | -0.014093 | -0.507286 |
| 33 | 1 | 0 | 0.768993  | -2.362770 | -1.499331 |
| 34 | 1 | 0 | -0.278736 | -2.883294 | -0.149681 |
| 35 | 6 | 0 | -0.687303 | -0.544192 | 0.930852  |
| 36 | 8 | 0 | -1.375324 | -1.326936 | 1.587601  |
| 37 | 8 | 0 | -0.788432 | 0.845547  | 1.154336  |
| 38 | 6 | 0 | -1.718479 | 1.315232  | 2.048847  |
| 39 | 6 | 0 | -1.280057 | 2.241697  | 2.993400  |
| 40 | 6 | 0 | -3.068423 | 0.969461  | 1.968858  |
| 41 | 6 | 0 | -2.196799 | 2.832011  | 3.860726  |

|    |   |   |           |           |           |
|----|---|---|-----------|-----------|-----------|
| 42 | 1 | 0 | -0.225503 | 2.501802  | 3.025038  |
| 43 | 6 | 0 | -3.975217 | 1.561284  | 2.844940  |
| 44 | 1 | 0 | -3.396783 | 0.246781  | 1.229260  |
| 45 | 6 | 0 | -3.547178 | 2.494027  | 3.790629  |
| 46 | 1 | 0 | -1.851265 | 3.558304  | 4.590719  |
| 47 | 1 | 0 | -5.026940 | 1.296075  | 2.781552  |
| 48 | 1 | 0 | -4.262041 | 2.952015  | 4.467426  |
| 49 | 6 | 0 | 3.250366  | -4.749283 | 0.520248  |
| 50 | 6 | 0 | 1.903905  | -4.238596 | -0.041048 |
| 51 | 1 | 0 | 3.971645  | -4.899762 | -0.287204 |
| 52 | 1 | 0 | 3.098802  | -5.704461 | 1.029217  |
| 53 | 1 | 0 | 1.838935  | -4.332136 | -1.127119 |
| 54 | 1 | 0 | 1.044214  | -4.735013 | 0.414944  |
| 55 | 6 | 0 | 4.192429  | -2.573210 | 0.725513  |
| 56 | 1 | 0 | 4.478749  | -1.807071 | 1.450912  |
| 57 | 1 | 0 | 5.057335  | -2.791594 | 0.093739  |
| 58 | 6 | 0 | 3.019391  | -2.069410 | -0.148493 |
| 59 | 1 | 0 | 2.842365  | -0.997371 | -0.027754 |
| 60 | 1 | 0 | 3.152251  | -2.299002 | -1.208715 |
| 61 | 6 | 0 | 1.638676  | -2.630603 | 1.777527  |
| 62 | 1 | 0 | 1.703279  | -1.559921 | 1.982323  |
| 63 | 1 | 0 | 0.643541  | -2.984202 | 2.053951  |
| 64 | 6 | 0 | 2.783231  | -3.427856 | 2.444365  |
| 65 | 1 | 0 | 3.234436  | -2.826887 | 3.238494  |
| 66 | 1 | 0 | 2.402312  | -4.352514 | 2.886431  |
| 67 | 7 | 0 | 3.814938  | -3.781436 | 1.463744  |



|    |   |   |          |           |           |
|----|---|---|----------|-----------|-----------|
| 68 | 7 | 0 | 1.770123 | -2.779434 | 0.287885  |
| 69 | 6 | 0 | 4.802874 | 1.031367  | 1.110968  |
| 70 | 6 | 0 | 3.837502 | 0.876738  | 2.109656  |
| 71 | 6 | 0 | 2.534691 | 1.307085  | 1.863658  |
| 72 | 6 | 0 | 2.194067 | 1.892728  | 0.645917  |
| 73 | 6 | 0 | 3.160125 | 2.027988  | -0.357186 |
| 74 | 6 | 0 | 4.471203 | 1.596190  | -0.115882 |
| 75 | 1 | 0 | 5.823629 | 0.701740  | 1.286308  |
| 76 | 1 | 0 | 4.099314 | 0.426080  | 3.062540  |
| 77 | 1 | 0 | 1.764816 | 1.186628  | 2.622070  |
| 78 | 1 | 0 | 1.172440 | 2.215165  | 0.464810  |
| 79 | 1 | 0 | 5.212854 | 1.711706  | -0.900775 |
| 80 | 8 | 0 | 2.886512 | 2.563399  | -1.567748 |
| 81 | 1 | 0 | 1.924197 | 2.746926  | -1.651371 |

-----

**TS1/2\_PhOH(SRS)**

SCF Done: E(RM062X) = -1896.55328704

Imaginary Frequencies = -211.8417

-----

| Center<br>Number | Atomic<br>Number | Atomic<br>Type | Coordinates (Angstroms) |          |           |
|------------------|------------------|----------------|-------------------------|----------|-----------|
|                  |                  |                | X                       | Y        | Z         |
| 1                | 6                | 0              | 2.080334                | 4.368713 | -1.289618 |
| 2                | 6                | 0              | 2.775631                | 4.095168 | -2.453025 |
| 3                | 1                | 0              | 3.451083                | 3.248246 | -2.469974 |

|    |   |   |          |           |           |
|----|---|---|----------|-----------|-----------|
| 4  | 6 | 0 | 1.212514 | 5.505924  | -1.211017 |
| 5  | 7 | 0 | 0.517731 | 6.430221  | -1.111203 |
| 6  | 6 | 0 | 2.952255 | 5.122704  | -3.511401 |
| 7  | 6 | 0 | 3.358951 | 6.409822  | -3.126261 |
| 8  | 6 | 0 | 2.790701 | 4.846192  | -4.874829 |
| 9  | 6 | 0 | 3.602219 | 7.393190  | -4.080833 |
| 10 | 1 | 0 | 3.511080 | 6.633937  | -2.074232 |
| 11 | 6 | 0 | 3.025510 | 5.837126  | -5.824976 |
| 12 | 1 | 0 | 2.455471 | 3.867869  | -5.201446 |
| 13 | 6 | 0 | 3.432988 | 7.111213  | -5.434376 |
| 14 | 1 | 0 | 3.925603 | 8.379655  | -3.762499 |
| 15 | 1 | 0 | 2.883596 | 5.609709  | -6.877528 |
| 16 | 1 | 0 | 3.615531 | 7.879288  | -6.179925 |
| 17 | 6 | 0 | 1.935343 | 3.413504  | -0.187555 |
| 18 | 8 | 0 | 0.954227 | 3.454594  | 0.564132  |
| 19 | 6 | 0 | 2.964595 | 2.354927  | 0.022052  |
| 20 | 6 | 0 | 2.533591 | 1.097864  | 0.462447  |
| 21 | 6 | 0 | 4.330564 | 2.600273  | -0.155581 |
| 22 | 6 | 0 | 3.458460 | 0.086149  | 0.693513  |
| 23 | 1 | 0 | 1.470985 | 0.922696  | 0.607769  |
| 24 | 6 | 0 | 5.254950 | 1.590165  | 0.096425  |
| 25 | 1 | 0 | 4.670483 | 3.584134  | -0.465690 |
| 26 | 6 | 0 | 4.819900 | 0.332696  | 0.511371  |
| 27 | 1 | 0 | 3.120472 | -0.892618 | 1.019505  |
| 28 | 1 | 0 | 6.315123 | 1.786284  | -0.030146 |
| 29 | 1 | 0 | 5.543132 | -0.455869 | 0.696510  |

|    |   |   |           |           |           |
|----|---|---|-----------|-----------|-----------|
| 30 | 6 | 0 | 1.406789  | 2.200259  | -3.330793 |
| 31 | 6 | 0 | 0.123388  | 2.899080  | -3.482468 |
| 32 | 1 | 0 | 1.688946  | 1.810769  | -2.361321 |
| 33 | 1 | 0 | -0.018055 | 3.669954  | -2.713616 |
| 34 | 1 | 0 | 0.019332  | 3.348838  | -4.474514 |
| 35 | 6 | 0 | 2.056732  | 1.648363  | -4.452490 |
| 36 | 8 | 0 | 1.780539  | 1.769146  | -5.645566 |
| 37 | 8 | 0 | 3.191527  | 0.922940  | -4.059064 |
| 38 | 6 | 0 | 4.084175  | 0.520976  | -5.023973 |
| 39 | 6 | 0 | 4.663891  | 1.430455  | -5.909305 |
| 40 | 6 | 0 | 4.462010  | -0.818965 | -5.036188 |
| 41 | 6 | 0 | 5.623007  | 0.984184  | -6.813654 |
| 42 | 1 | 0 | 4.365493  | 2.473558  | -5.879326 |
| 43 | 6 | 0 | 5.429385  | -1.253967 | -5.940461 |
| 44 | 1 | 0 | 3.999116  | -1.504266 | -4.332618 |
| 45 | 6 | 0 | 6.009422  | -0.356700 | -6.834609 |
| 46 | 1 | 0 | 6.073562  | 1.691116  | -7.504364 |
| 47 | 1 | 0 | 5.725817  | -2.298841 | -5.945259 |
| 48 | 1 | 0 | 6.759826  | -0.698059 | -7.541032 |
| 49 | 6 | 0 | -2.352467 | 2.908427  | -3.305340 |
| 50 | 6 | 0 | -3.611879 | 2.012600  | -3.327433 |
| 51 | 1 | 0 | -2.278720 | 3.512808  | -2.396445 |
| 52 | 1 | 0 | -2.286248 | 3.561255  | -4.178533 |
| 53 | 1 | 0 | -4.324741 | 2.362733  | -2.575866 |
| 54 | 1 | 0 | -4.094928 | 2.051839  | -4.307406 |
| 55 | 6 | 0 | -1.088487 | 1.258908  | -2.032445 |

|    |   |   |           |           |           |
|----|---|---|-----------|-----------|-----------|
| 56 | 1 | 0 | -0.276497 | 0.536156  | -2.128938 |
| 57 | 1 | 0 | -0.837298 | 1.976400  | -1.245220 |
| 58 | 6 | 0 | -2.461243 | 0.579449  | -1.815381 |
| 59 | 1 | 0 | -2.311501 | -0.461799 | -1.518003 |
| 60 | 1 | 0 | -3.020719 | 1.087263  | -1.024810 |
| 61 | 6 | 0 | -2.450022 | 0.103249  | -4.150255 |
| 62 | 1 | 0 | -2.082596 | -0.887816 | -3.870152 |
| 63 | 1 | 0 | -3.079209 | -0.000851 | -5.037907 |
| 64 | 6 | 0 | -1.267701 | 1.052518  | -4.458705 |
| 65 | 1 | 0 | -0.315968 | 0.527580  | -4.547050 |
| 66 | 1 | 0 | -1.430810 | 1.651412  | -5.357777 |
| 67 | 7 | 0 | -1.138146 | 2.024657  | -3.323215 |
| 68 | 7 | 0 | -3.260661 | 0.618523  | -3.043270 |
| 69 | 6 | 0 | -4.708850 | 2.593191  | 0.650504  |
| 70 | 6 | 0 | -4.277668 | 1.566477  | 1.491561  |
| 71 | 6 | 0 | -2.921931 | 1.463852  | 1.799577  |
| 72 | 6 | 0 | -1.999392 | 2.367662  | 1.275243  |
| 73 | 6 | 0 | -2.439072 | 3.389149  | 0.426088  |
| 74 | 6 | 0 | -3.799000 | 3.502423  | 0.117726  |
| 75 | 1 | 0 | -5.762818 | 2.689222  | 0.404411  |
| 76 | 1 | 0 | -4.989624 | 0.857813  | 1.902469  |
| 77 | 1 | 0 | -2.571638 | 0.671659  | 2.455485  |
| 78 | 1 | 0 | -0.941809 | 2.287028  | 1.512977  |
| 79 | 1 | 0 | -4.123288 | 4.306237  | -0.537519 |
| 80 | 8 | 0 | -1.592492 | 4.283755  | -0.141420 |
| 81 | 1 | 0 | -0.666003 | 4.107043  | 0.137942  |

-----  
**TS1/2\_PhOH(SSR)**

SCF Done: E(RM062X) = -1896.55809415

Imaginary Frequencies = -122.0683  
-----

| Center<br>Number | Atomic<br>Number | Atomic<br>Type | Coordinates (Angstroms) |           |           |
|------------------|------------------|----------------|-------------------------|-----------|-----------|
|                  |                  |                | X                       | Y         | Z         |
| 1                | 6                | 0              | -3.341716               | -2.253529 | 1.015185  |
| 2                | 6                | 0              | -4.810431               | -2.235445 | 0.968508  |
| 3                | 1                | 0              | -2.794885               | -1.639786 | 1.720766  |
| 4                | 1                | 0              | -5.241311               | -1.244837 | 1.153269  |
| 5                | 1                | 0              | -5.177390               | -2.616196 | 0.009629  |
| 6                | 6                | 0              | -2.657065               | -3.181319 | 0.226037  |
| 7                | 8                | 0              | -3.110878               | -3.997387 | -0.580909 |
| 8                | 8                | 0              | -1.259372               | -3.058926 | 0.377845  |
| 9                | 6                | 0              | -0.469885               | -4.095306 | -0.057955 |
| 10               | 6                | 0              | 0.685910                | -3.778442 | -0.768313 |
| 11               | 6                | 0              | -0.755515               | -5.423289 | 0.269766  |
| 12               | 6                | 0              | 1.558172                | -4.795498 | -1.154489 |
| 13               | 1                | 0              | 0.889269                | -2.738023 | -1.003687 |
| 14               | 6                | 0              | 0.118833                | -6.429810 | -0.127305 |
| 15               | 1                | 0              | -1.658317               | -5.657713 | 0.823453  |
| 16               | 6                | 0              | 1.278452                | -6.123550 | -0.841088 |
| 17               | 1                | 0              | 2.458744                | -4.543588 | -1.707238 |

|    |   |   |           |           |           |
|----|---|---|-----------|-----------|-----------|
| 18 | 1 | 0 | -0.107064 | -7.461749 | 0.126259  |
| 19 | 1 | 0 | 1.956580  | -6.914114 | -1.147677 |
| 20 | 6 | 0 | -6.998947 | -3.128253 | 1.733727  |
| 21 | 6 | 0 | -7.719465 | -3.861001 | 2.889482  |
| 22 | 1 | 0 | -7.307635 | -2.084673 | 1.640930  |
| 23 | 1 | 0 | -7.131786 | -3.628295 | 0.771432  |
| 24 | 1 | 0 | -8.249540 | -3.146787 | 3.525487  |
| 25 | 1 | 0 | -8.447840 | -4.566771 | 2.482924  |
| 26 | 6 | 0 | -5.296953 | -2.607753 | 3.398348  |
| 27 | 1 | 0 | -4.219425 | -2.484528 | 3.521239  |
| 28 | 1 | 0 | -5.780545 | -1.628843 | 3.443630  |
| 29 | 6 | 0 | -5.900308 | -3.615792 | 4.405335  |
| 30 | 1 | 0 | -5.107110 | -4.162535 | 4.922340  |
| 31 | 1 | 0 | -6.491569 | -3.081321 | 5.153084  |
| 32 | 6 | 0 | -5.920168 | -5.419560 | 2.849459  |
| 33 | 1 | 0 | -5.295802 | -6.069000 | 3.468102  |
| 34 | 1 | 0 | -6.578237 | -6.050552 | 2.245819  |
| 35 | 6 | 0 | -5.024567 | -4.544253 | 1.942405  |
| 36 | 1 | 0 | -3.986545 | -4.518224 | 2.278011  |
| 37 | 1 | 0 | -5.044311 | -4.840820 | 0.892494  |
| 38 | 7 | 0 | -5.524345 | -3.129761 | 2.011803  |
| 39 | 7 | 0 | -6.756361 | -4.587970 | 3.720385  |
| 40 | 6 | 0 | -1.546033 | -0.551792 | -1.199929 |
| 41 | 6 | 0 | -2.870785 | -0.419900 | -0.856508 |
| 42 | 1 | 0 | -3.086876 | 0.171184  | 0.025331  |
| 43 | 6 | 0 | -1.114506 | -1.192132 | -2.405316 |

|    |   |   |           |           |           |
|----|---|---|-----------|-----------|-----------|
| 44 | 7 | 0 | -0.732734 | -1.688740 | -3.381537 |
| 45 | 6 | 0 | -4.047787 | -0.763832 | -1.655430 |
| 46 | 6 | 0 | -4.083736 | -1.825413 | -2.573606 |
| 47 | 6 | 0 | -5.214334 | -0.011334 | -1.439242 |
| 48 | 6 | 0 | -5.256256 | -2.104005 | -3.269434 |
| 49 | 1 | 0 | -3.219008 | -2.462948 | -2.709704 |
| 50 | 6 | 0 | -6.379328 | -0.286460 | -2.145165 |
| 51 | 1 | 0 | -5.194639 | 0.797832  | -0.712953 |
| 52 | 6 | 0 | -6.401468 | -1.335484 | -3.064137 |
| 53 | 1 | 0 | -5.277424 | -2.933220 | -3.970244 |
| 54 | 1 | 0 | -7.270212 | 0.309900  | -1.972954 |
| 55 | 1 | 0 | -7.311399 | -1.559305 | -3.613097 |
| 56 | 6 | 0 | -0.452942 | -0.178086 | -0.300996 |
| 57 | 8 | 0 | 0.712575  | -0.481993 | -0.576788 |
| 58 | 6 | 0 | -0.731243 | 0.537597  | 0.980905  |
| 59 | 6 | 0 | -1.451525 | 1.735261  | 1.023691  |
| 60 | 6 | 0 | -0.179332 | 0.009701  | 2.153068  |
| 61 | 6 | 0 | -1.622441 | 2.396866  | 2.236897  |
| 62 | 1 | 0 | -1.857578 | 2.156994  | 0.108222  |
| 63 | 6 | 0 | -0.372482 | 0.663519  | 3.366209  |
| 64 | 1 | 0 | 0.385584  | -0.917563 | 2.107461  |
| 65 | 6 | 0 | -1.091368 | 1.857841  | 3.407679  |
| 66 | 1 | 0 | -2.170076 | 3.333695  | 2.266854  |
| 67 | 1 | 0 | 0.043006  | 0.245083  | 4.277735  |
| 68 | 1 | 0 | -1.234229 | 2.370937  | 4.353984  |
| 69 | 6 | 0 | 5.773655  | 2.262821  | -0.180976 |

|    |   |   |          |          |           |
|----|---|---|----------|----------|-----------|
| 70 | 6 | 0 | 5.537016 | 2.397759 | -1.549719 |
| 71 | 6 | 0 | 4.376017 | 1.851860 | -2.094087 |
| 72 | 6 | 0 | 3.457932 | 1.180050 | -1.290285 |
| 73 | 6 | 0 | 3.700842 | 1.049514 | 0.082306  |
| 74 | 6 | 0 | 4.865896 | 1.594934 | 0.633773  |
| 75 | 1 | 0 | 6.674616 | 2.681955 | 0.258578  |
| 76 | 1 | 0 | 6.247958 | 2.920367 | -2.181895 |
| 77 | 1 | 0 | 4.177092 | 1.946813 | -3.158122 |
| 78 | 1 | 0 | 2.554830 | 0.752667 | -1.717668 |
| 79 | 1 | 0 | 5.040554 | 1.484673 | 1.699967  |
| 80 | 8 | 0 | 2.848755 | 0.409348 | 0.914125  |
| 81 | 1 | 0 | 2.066449 | 0.089647 | 0.409772  |

-----

## 2\_PhOH(RRS)

SCF Done: E(RM062X) = -1896.61253310

-----

| Center<br>Number | Atomic<br>Number | Atomic<br>Type | Coordinates (Angstroms) |           |           |
|------------------|------------------|----------------|-------------------------|-----------|-----------|
|                  |                  |                | X                       | Y         | Z         |
| 1                | 6                | 0              | 0.037256                | -0.697965 | 0.687222  |
| 2                | 6                | 0              | -1.420287               | -0.277650 | 0.856288  |
| 3                | 1                | 0              | 0.608635                | -0.587604 | 1.613631  |
| 4                | 1                | 0              | -1.998171               | -1.089042 | 1.307037  |
| 5                | 1                | 0              | -1.850060               | -0.033439 | -0.119849 |
| 6                | 6                | 0              | 0.707309                | 0.117688  | -0.400653 |



|    |   |   |           |           |           |
|----|---|---|-----------|-----------|-----------|
| 7  | 8 | 0 | 0.226992  | 0.333057  | -1.484781 |
| 8  | 8 | 0 | 1.929056  | 0.545094  | -0.013739 |
| 9  | 6 | 0 | 2.690539  | 1.268394  | -0.934302 |
| 10 | 6 | 0 | 2.288544  | 2.540373  | -1.322959 |
| 11 | 6 | 0 | 3.873380  | 0.699054  | -1.382915 |
| 12 | 6 | 0 | 3.099977  | 3.258295  | -2.196882 |
| 13 | 1 | 0 | 1.359302  | 2.955480  | -0.944670 |
| 14 | 6 | 0 | 4.678337  | 1.430913  | -2.255043 |
| 15 | 1 | 0 | 4.151523  | -0.295249 | -1.045306 |
| 16 | 6 | 0 | 4.292535  | 2.705857  | -2.664558 |
| 17 | 1 | 0 | 2.799081  | 4.253078  | -2.510718 |
| 18 | 1 | 0 | 5.608223  | 1.000569  | -2.613989 |
| 19 | 1 | 0 | 4.921804  | 3.271849  | -3.344384 |
| 20 | 6 | 0 | -3.408073 | 2.397693  | 2.670448  |
| 21 | 6 | 0 | -3.100583 | 1.318550  | 1.610588  |
| 22 | 1 | 0 | -3.991246 | 1.968968  | 3.490273  |
| 23 | 1 | 0 | -3.988441 | 3.203954  | 2.215075  |
| 24 | 1 | 0 | -3.690317 | 0.410585  | 1.750563  |
| 25 | 1 | 0 | -3.224654 | 1.681929  | 0.587936  |
| 26 | 6 | 0 | -1.507773 | 1.895768  | 4.007842  |
| 27 | 1 | 0 | -0.521092 | 2.259793  | 4.305851  |
| 28 | 1 | 0 | -2.090685 | 1.697463  | 4.910896  |
| 29 | 6 | 0 | -1.376930 | 0.592306  | 3.186548  |
| 30 | 1 | 0 | -0.378474 | 0.160167  | 3.254528  |
| 31 | 1 | 0 | -2.109743 | -0.169041 | 3.467285  |
| 32 | 6 | 0 | -0.800240 | 2.097701  | 1.335947  |

|    |   |   |           |           |           |
|----|---|---|-----------|-----------|-----------|
| 33 | 1 | 0 | 0.234314  | 1.842609  | 1.579391  |
| 34 | 1 | 0 | -0.910763 | 2.221450  | 0.255673  |
| 35 | 6 | 0 | -1.289289 | 3.337154  | 2.123860  |
| 36 | 1 | 0 | -0.426838 | 3.875688  | 2.523584  |
| 37 | 1 | 0 | -1.844364 | 4.010723  | 1.466021  |
| 38 | 7 | 0 | -2.167544 | 2.943566  | 3.226144  |
| 39 | 7 | 0 | -1.648365 | 0.919593  | 1.738156  |
| 40 | 6 | 0 | -0.524090 | -3.081968 | 1.334453  |
| 41 | 6 | 0 | 0.095740  | -2.206441 | 0.257060  |
| 42 | 1 | 0 | -0.526597 | -2.286194 | -0.641552 |
| 43 | 6 | 0 | -0.163920 | -2.796150 | 2.673527  |
| 44 | 7 | 0 | 0.187927  | -2.533795 | 3.755399  |
| 45 | 6 | 0 | 1.526043  | -2.552621 | -0.144220 |
| 46 | 6 | 0 | 2.522573  | -2.772590 | 0.812921  |
| 47 | 6 | 0 | 1.871692  | -2.611138 | -1.498262 |
| 48 | 6 | 0 | 3.828731  | -3.057401 | 0.422071  |
| 49 | 1 | 0 | 2.279270  | -2.724015 | 1.871360  |
| 50 | 6 | 0 | 3.177354  | -2.902147 | -1.892365 |
| 51 | 1 | 0 | 1.104012  | -2.439113 | -2.250200 |
| 52 | 6 | 0 | 4.160383  | -3.128323 | -0.931484 |
| 53 | 1 | 0 | 4.590003  | -3.228466 | 1.177744  |
| 54 | 1 | 0 | 3.423115  | -2.952626 | -2.949281 |
| 55 | 1 | 0 | 5.178175  | -3.358677 | -1.232601 |
| 56 | 6 | 0 | -1.558420 | -4.019712 | 1.169397  |
| 57 | 8 | 0 | -2.256216 | -4.458705 | 2.137124  |
| 58 | 6 | 0 | -1.898415 | -4.565175 | -0.190973 |

|    |   |   |           |           |           |
|----|---|---|-----------|-----------|-----------|
| 59 | 6 | 0 | -3.220595 | -4.949213 | -0.445856 |
| 60 | 6 | 0 | -0.934586 | -4.776966 | -1.182997 |
| 61 | 6 | 0 | -3.582508 | -5.472724 | -1.683165 |
| 62 | 1 | 0 | -3.959817 | -4.843197 | 0.341954  |
| 63 | 6 | 0 | -1.291946 | -5.311356 | -2.418840 |
| 64 | 1 | 0 | 0.107527  | -4.550775 | -0.979915 |
| 65 | 6 | 0 | -2.619321 | -5.648446 | -2.676855 |
| 66 | 1 | 0 | -4.615343 | -5.751688 | -1.871065 |
| 67 | 1 | 0 | -0.530009 | -5.471252 | -3.176217 |
| 68 | 1 | 0 | -2.900815 | -6.059811 | -3.641930 |
| 69 | 6 | 0 | -5.866420 | -0.224869 | 3.370272  |
| 70 | 6 | 0 | -6.293833 | -0.481519 | 2.066157  |
| 71 | 6 | 0 | -5.632356 | -1.454823 | 1.318095  |
| 72 | 6 | 0 | -4.558981 | -2.162120 | 1.854840  |
| 73 | 6 | 0 | -4.130921 | -1.903308 | 3.165303  |
| 74 | 6 | 0 | -4.794614 | -0.922959 | 3.918690  |
| 75 | 1 | 0 | -6.371051 | 0.529357  | 3.968446  |
| 76 | 1 | 0 | -7.129401 | 0.066031  | 1.641727  |
| 77 | 1 | 0 | -5.948816 | -1.668436 | 0.300549  |
| 78 | 1 | 0 | -4.041369 | -2.913393 | 1.267507  |
| 79 | 1 | 0 | -4.456516 | -0.726913 | 4.932804  |
| 80 | 8 | 0 | -3.088542 | -2.537404 | 3.731972  |
| 81 | 1 | 0 | -2.732612 | -3.269257 | 3.139679  |

---

**2\_PhOH(RSR)**

SCF Done: E(RM062X) = -1896.60359866

---

| Center<br>Number | Atomic<br>Number | Atomic<br>Type | Coordinates (Angstroms) |           |           |
|------------------|------------------|----------------|-------------------------|-----------|-----------|
|                  |                  |                | X                       | Y         | Z         |
| 1                | 6                | 0              | -1.028368               | 3.033043  | -0.621178 |
| 2                | 6                | 0              | -1.732702               | 2.848077  | -1.955929 |
| 3                | 1                | 0              | -2.571401               | 2.172189  | -1.780317 |
| 4                | 6                | 0              | -0.201561               | 4.165765  | -0.443078 |
| 5                | 7                | 0              | 0.470205                | 5.112727  | -0.318097 |
| 6                | 6                | 0              | -2.334917               | 4.133201  | -2.512847 |
| 7                | 6                | 0              | -2.991840               | 5.009555  | -1.637691 |
| 8                | 6                | 0              | -2.324856               | 4.452799  | -3.874047 |
| 9                | 6                | 0              | -3.619275               | 6.158889  | -2.106132 |
| 10               | 1                | 0              | -3.008961               | 4.782173  | -0.574985 |
| 11               | 6                | 0              | -2.950651               | 5.607282  | -4.347428 |
| 12               | 1                | 0              | -1.829393               | 3.811968  | -4.597441 |
| 13               | 6                | 0              | -3.600466               | 6.465170  | -3.466929 |
| 14               | 1                | 0              | -4.121693               | 6.819510  | -1.405280 |
| 15               | 1                | 0              | -2.923378               | 5.831330  | -5.409802 |
| 16               | 1                | 0              | -4.084489               | 7.365230  | -3.834106 |
| 17               | 6                | 0              | -0.948775               | 2.045011  | 0.369087  |
| 18               | 8                | 0              | -0.161115               | 2.077883  | 1.364120  |
| 19               | 6                | 0              | -1.819241               | 0.818735  | 0.266196  |
| 20               | 6                | 0              | -3.212574               | 0.889399  | 0.171886  |
| 21               | 6                | 0              | -1.201837               | -0.434699 | 0.319951  |

|    |   |   |           |           |           |
|----|---|---|-----------|-----------|-----------|
| 22 | 6 | 0 | -3.974525 | -0.275703 | 0.113327  |
| 23 | 1 | 0 | -3.701836 | 1.860921  | 0.154811  |
| 24 | 6 | 0 | -1.961167 | -1.599768 | 0.243604  |
| 25 | 1 | 0 | -0.120810 | -0.487614 | 0.421226  |
| 26 | 6 | 0 | -3.349792 | -1.521899 | 0.139468  |
| 27 | 1 | 0 | -5.056742 | -0.209963 | 0.048889  |
| 28 | 1 | 0 | -1.470640 | -2.568519 | 0.273086  |
| 29 | 1 | 0 | -3.943595 | -2.429825 | 0.087991  |
| 30 | 6 | 0 | -0.806689 | 2.076853  | -2.946568 |
| 31 | 6 | 0 | 0.396579  | 2.894201  | -3.431989 |
| 32 | 1 | 0 | -0.474446 | 1.207201  | -2.365911 |
| 33 | 1 | 0 | 0.464577  | 3.848150  | -2.903125 |
| 34 | 1 | 0 | 0.320919  | 3.095134  | -4.502946 |
| 35 | 6 | 0 | -1.545425 | 1.447889  | -4.119199 |
| 36 | 8 | 0 | -1.150865 | 1.395154  | -5.257406 |
| 37 | 8 | 0 | -2.704220 | 0.893420  | -3.702839 |
| 38 | 6 | 0 | -3.509022 | 0.246990  | -4.642444 |
| 39 | 6 | 0 | -3.703934 | -1.118210 | -4.491266 |
| 40 | 6 | 0 | -4.142429 | 0.979016  | -5.639157 |
| 41 | 6 | 0 | -4.561317 | -1.773024 | -5.373611 |
| 42 | 1 | 0 | -3.196684 | -1.646291 | -3.689929 |
| 43 | 6 | 0 | -4.992859 | 0.311200  | -6.516081 |
| 44 | 1 | 0 | -3.972972 | 2.048805  | -5.716868 |
| 45 | 6 | 0 | -5.203151 | -1.061748 | -6.385684 |
| 46 | 1 | 0 | -4.726933 | -2.840543 | -5.265974 |
| 47 | 1 | 0 | -5.495904 | 0.867254  | -7.301111 |

|    |   |   |           |           |           |
|----|---|---|-----------|-----------|-----------|
| 48 | 1 | 0 | -5.870345 | -1.575250 | -7.071034 |
| 49 | 6 | 0 | 4.179941  | 2.575069  | -3.552795 |
| 50 | 6 | 0 | 2.776834  | 3.106451  | -3.921952 |
| 51 | 1 | 0 | 4.659897  | 3.236778  | -2.827155 |
| 52 | 1 | 0 | 4.802548  | 2.534336  | -4.449821 |
| 53 | 1 | 0 | 2.612516  | 4.129450  | -3.578384 |
| 54 | 1 | 0 | 2.570117  | 3.043975  | -4.992633 |
| 55 | 6 | 0 | 3.421622  | 1.348131  | -1.662860 |
| 56 | 1 | 0 | 3.228077  | 0.338987  | -1.289242 |
| 57 | 1 | 0 | 4.081917  | 1.854665  | -0.955995 |
| 58 | 6 | 0 | 2.102791  | 2.142273  | -1.782731 |
| 59 | 1 | 0 | 1.278164  | 1.652860  | -1.262881 |
| 60 | 1 | 0 | 2.187040  | 3.168062  | -1.419375 |
| 61 | 6 | 0 | 1.802041  | 0.869909  | -3.868520 |
| 62 | 1 | 0 | 1.158902  | 0.215619  | -3.277713 |
| 63 | 1 | 0 | 1.399732  | 0.960423  | -4.878939 |
| 64 | 6 | 0 | 3.275224  | 0.394669  | -3.843984 |
| 65 | 1 | 0 | 3.317414  | -0.638641 | -3.491743 |
| 66 | 1 | 0 | 3.704580  | 0.434866  | -4.848513 |
| 67 | 7 | 0 | 4.085912  | 1.238052  | -2.963817 |
| 68 | 7 | 0 | 1.740355  | 2.239851  | -3.244008 |
| 69 | 6 | 0 | 4.691058  | 4.963098  | 2.491110  |
| 70 | 6 | 0 | 3.842686  | 5.726595  | 3.293410  |
| 71 | 6 | 0 | 2.484253  | 5.412428  | 3.334471  |
| 72 | 6 | 0 | 1.973369  | 4.354066  | 2.588891  |
| 73 | 6 | 0 | 2.829661  | 3.590014  | 1.783534  |

|    |   |   |          |          |          |
|----|---|---|----------|----------|----------|
| 74 | 6 | 0 | 4.194105 | 3.902236 | 1.740184 |
| 75 | 1 | 0 | 5.752176 | 5.193841 | 2.448859 |
| 76 | 1 | 0 | 4.234218 | 6.553274 | 3.878036 |
| 77 | 1 | 0 | 1.810481 | 5.998496 | 3.953834 |
| 78 | 1 | 0 | 0.915059 | 4.109726 | 2.610307 |
| 79 | 1 | 0 | 4.849335 | 3.300363 | 1.116605 |
| 80 | 8 | 0 | 2.387689 | 2.549808 | 1.048872 |
| 81 | 1 | 0 | 1.394524 | 2.447372 | 1.156090 |

-----

## 2\_PhOH(SRS)

SCF Done: E(RM062X) = -1896.60633221

-----

| Center<br>Number | Atomic<br>Number | Atomic<br>Type | Coordinates (Angstroms) |          |           |
|------------------|------------------|----------------|-------------------------|----------|-----------|
|                  |                  |                | X                       | Y        | Z         |
| 1                | 6                | 0              | 1.701876                | 4.187279 | -1.473939 |
| 2                | 6                | 0              | 2.395551                | 3.677894 | -2.729860 |
| 3                | 1                | 0              | 3.314722                | 3.175523 | -2.424806 |
| 4                | 6                | 0              | 0.925538                | 5.365955 | -1.574778 |
| 5                | 7                | 0              | 0.300731                | 6.345543 | -1.680993 |
| 6                | 6                | 0              | 2.833397                | 4.812133 | -3.647818 |
| 7                | 6                | 0              | 3.716416                | 5.769251 | -3.125988 |
| 8                | 6                | 0              | 2.427081                | 4.947633 | -4.976305 |
| 9                | 6                | 0              | 4.181158                | 6.819813 | -3.906773 |
| 10               | 1                | 0              | 4.036922                | 5.681810 | -2.090086 |

|    |   |   |           |           |           |
|----|---|---|-----------|-----------|-----------|
| 11 | 6 | 0 | 2.892226  | 6.003700  | -5.765303 |
| 12 | 1 | 0 | 1.746262  | 4.234660  | -5.429787 |
| 13 | 6 | 0 | 3.768416  | 6.942802  | -5.235202 |
| 14 | 1 | 0 | 4.867922  | 7.545347  | -3.480461 |
| 15 | 1 | 0 | 2.559025  | 6.085546  | -6.795780 |
| 16 | 1 | 0 | 4.127533  | 7.764781  | -5.847202 |
| 17 | 6 | 0 | 1.630259  | 3.501837  | -0.254110 |
| 18 | 8 | 0 | 0.885107  | 3.839979  | 0.716109  |
| 19 | 6 | 0 | 2.447624  | 2.252360  | -0.045674 |
| 20 | 6 | 0 | 1.790819  | 1.104078  | 0.411557  |
| 21 | 6 | 0 | 3.833368  | 2.212679  | -0.230326 |
| 22 | 6 | 0 | 2.497320  | -0.074256 | 0.636881  |
| 23 | 1 | 0 | 0.718771  | 1.143623  | 0.591284  |
| 24 | 6 | 0 | 4.544058  | 1.038676  | 0.011868  |
| 25 | 1 | 0 | 4.362554  | 3.110439  | -0.540657 |
| 26 | 6 | 0 | 3.876651  | -0.109689 | 0.434886  |
| 27 | 1 | 0 | 1.973225  | -0.962304 | 0.978324  |
| 28 | 1 | 0 | 5.621294  | 1.023524  | -0.125368 |
| 29 | 1 | 0 | 4.430436  | -1.025866 | 0.617899  |
| 30 | 6 | 0 | 1.551912  | 2.554978  | -3.412922 |
| 31 | 6 | 0 | 0.142572  | 2.993623  | -3.818481 |
| 32 | 1 | 0 | 1.502491  | 1.772090  | -2.645016 |
| 33 | 1 | 0 | -0.104478 | 3.963031  | -3.380172 |
| 34 | 1 | 0 | 0.049533  | 3.061710  | -4.904134 |
| 35 | 6 | 0 | 2.283333  | 1.902262  | -4.574797 |
| 36 | 8 | 0 | 1.811296  | 1.635272  | -5.651496 |



|    |   |   |           |           |           |
|----|---|---|-----------|-----------|-----------|
| 37 | 8 | 0 | 3.560489  | 1.625511  | -4.230255 |
| 38 | 6 | 0 | 4.404616  | 1.097369  | -5.208441 |
| 39 | 6 | 0 | 4.771856  | 1.878518  | -6.297679 |
| 40 | 6 | 0 | 4.907255  | -0.180713 | -5.014155 |
| 41 | 6 | 0 | 5.667731  | 1.351786  | -7.223719 |
| 42 | 1 | 0 | 4.362697  | 2.878690  | -6.408136 |
| 43 | 6 | 0 | 5.808943  | -0.693317 | -5.946204 |
| 44 | 1 | 0 | 4.599980  | -0.753035 | -4.144569 |
| 45 | 6 | 0 | 6.186899  | 0.068361  | -7.050060 |
| 46 | 1 | 0 | 5.962641  | 1.948674  | -8.081202 |
| 47 | 1 | 0 | 6.215074  | -1.690264 | -5.805854 |
| 48 | 1 | 0 | 6.888498  | -0.335155 | -7.773392 |
| 49 | 6 | 0 | -2.254381 | 2.580317  | -4.001427 |
| 50 | 6 | 0 | -3.431873 | 1.785793  | -3.397286 |
| 51 | 1 | 0 | -2.311334 | 3.648067  | -3.781680 |
| 52 | 1 | 0 | -2.158016 | 2.435203  | -5.079732 |
| 53 | 1 | 0 | -3.960329 | 2.388430  | -2.653016 |
| 54 | 1 | 0 | -4.134749 | 1.517205  | -4.189682 |
| 55 | 6 | 0 | -1.143137 | 2.047574  | -1.894071 |
| 56 | 1 | 0 | -0.172280 | 1.831541  | -1.445672 |
| 57 | 1 | 0 | -1.450219 | 3.057598  | -1.608314 |
| 58 | 6 | 0 | -2.191156 | 0.962853  | -1.548270 |
| 59 | 1 | 0 | -1.699636 | 0.073717  | -1.142562 |
| 60 | 1 | 0 | -2.882262 | 1.350051  | -0.795863 |
| 61 | 6 | 0 | -2.054413 | -0.137989 | -3.658774 |
| 62 | 1 | 0 | -1.812628 | -1.118911 | -3.242727 |

|    |   |   |           |           |           |
|----|---|---|-----------|-----------|-----------|
| 63 | 1 | 0 | -2.581055 | -0.284588 | -4.605354 |
| 64 | 6 | 0 | -0.749372 | 0.659295  | -3.885043 |
| 65 | 1 | 0 | 0.083550  | 0.244331  | -3.313024 |
| 66 | 1 | 0 | -0.470944 | 0.727872  | -4.937959 |
| 67 | 7 | 0 | -0.968146 | 2.068125  | -3.392390 |
| 68 | 7 | 0 | -2.947496 | 0.570092  | -2.739978 |
| 69 | 6 | 0 | -4.548755 | 2.595075  | 1.026777  |
| 70 | 6 | 0 | -4.015982 | 1.548189  | 1.781656  |
| 71 | 6 | 0 | -2.647991 | 1.535399  | 2.049580  |
| 72 | 6 | 0 | -1.814195 | 2.545186  | 1.571828  |
| 73 | 6 | 0 | -2.352722 | 3.590331  | 0.806756  |
| 74 | 6 | 0 | -3.728980 | 3.608745  | 0.540156  |
| 75 | 1 | 0 | -5.613560 | 2.622418  | 0.811162  |
| 76 | 1 | 0 | -4.659066 | 0.758176  | 2.156525  |
| 77 | 1 | 0 | -2.217707 | 0.730962  | 2.640632  |
| 78 | 1 | 0 | -0.748655 | 2.543718  | 1.782517  |
| 79 | 1 | 0 | -4.134927 | 4.424556  | -0.051534 |
| 80 | 8 | 0 | -1.599356 | 4.585754  | 0.298839  |
| 81 | 1 | 0 | -0.624861 | 4.399462  | 0.451053  |

-----

## 2\_PhOH(SSR)

SCF Done: E(RM062X) = -1896.60302173

-----

| Center<br>Number | Atomic<br>Number | Atomic<br>Type | Coordinates (Angstroms) |   |   |
|------------------|------------------|----------------|-------------------------|---|---|
|                  |                  |                | X                       | Y | Z |

---

|    |   |   |           |           |           |
|----|---|---|-----------|-----------|-----------|
| 1  | 6 | 0 | -3.560971 | -1.699996 | 0.112112  |
| 2  | 6 | 0 | -4.867751 | -2.381392 | 0.501165  |
| 3  | 1 | 0 | -3.156787 | -1.131569 | 0.953903  |
| 4  | 1 | 0 | -5.701581 | -1.678699 | 0.420686  |
| 5  | 1 | 0 | -5.067058 | -3.239379 | -0.146466 |
| 6  | 6 | 0 | -2.483656 | -2.686557 | -0.291099 |
| 7  | 8 | 0 | -2.635472 | -3.665333 | -0.979085 |
| 8  | 8 | 0 | -1.292302 | -2.313065 | 0.226940  |
| 9  | 6 | 0 | -0.155866 | -3.026240 | -0.162886 |
| 10 | 6 | 0 | 0.721395  | -2.413639 | -1.047498 |
| 11 | 6 | 0 | 0.090975  | -4.278049 | 0.384683  |
| 12 | 6 | 0 | 1.891585  | -3.090394 | -1.391552 |
| 13 | 1 | 0 | 0.486212  | -1.424416 | -1.437352 |
| 14 | 6 | 0 | 1.262988  | -4.940859 | 0.029873  |
| 15 | 1 | 0 | -0.621232 | -4.716115 | 1.077631  |
| 16 | 6 | 0 | 2.162309  | -4.349114 | -0.857294 |
| 17 | 1 | 0 | 2.593854  | -2.629116 | -2.079297 |
| 18 | 1 | 0 | 1.472973  | -5.919819 | 0.449850  |
| 19 | 1 | 0 | 3.075649  | -4.869393 | -1.128775 |
| 20 | 6 | 0 | -6.181724 | -3.711140 | 2.078713  |
| 21 | 6 | 0 | -6.355416 | -4.052051 | 3.575133  |
| 22 | 1 | 0 | -7.001881 | -3.107322 | 1.686054  |
| 23 | 1 | 0 | -6.052627 | -4.599216 | 1.456129  |
| 24 | 1 | 0 | -7.134594 | -3.430209 | 4.023350  |
| 25 | 1 | 0 | -6.647355 | -5.099903 | 3.677767  |

|    |   |   |           |           |           |
|----|---|---|-----------|-----------|-----------|
| 26 | 6 | 0 | -4.955578 | -1.772463 | 2.918694  |
| 27 | 1 | 0 | -4.134033 | -1.089460 | 2.699340  |
| 28 | 1 | 0 | -5.906224 | -1.258953 | 2.757602  |
| 29 | 6 | 0 | -4.838353 | -2.382253 | 4.333928  |
| 30 | 1 | 0 | -3.833229 | -2.229261 | 4.735250  |
| 31 | 1 | 0 | -5.554265 | -1.893622 | 4.999113  |
| 32 | 6 | 0 | -4.016662 | -4.488571 | 3.588850  |
| 33 | 1 | 0 | -3.110669 | -4.459904 | 4.198298  |
| 34 | 1 | 0 | -4.296340 | -5.533582 | 3.432885  |
| 35 | 6 | 0 | -3.744605 | -3.795727 | 2.232177  |
| 36 | 1 | 0 | -2.859848 | -3.155818 | 2.273074  |
| 37 | 1 | 0 | -3.651019 | -4.509219 | 1.410347  |
| 38 | 7 | 0 | -4.915894 | -2.900175 | 1.916551  |
| 39 | 7 | 0 | -5.106176 | -3.821889 | 4.303948  |
| 40 | 6 | 0 | -2.478926 | -0.193050 | -1.652776 |
| 41 | 6 | 0 | -3.793069 | -0.623773 | -1.015081 |
| 42 | 1 | 0 | -4.195011 | 0.227388  | -0.459896 |
| 43 | 6 | 0 | -2.069256 | -0.797587 | -2.864102 |
| 44 | 7 | 0 | -1.736458 | -1.295457 | -3.865503 |
| 45 | 6 | 0 | -4.858998 | -0.972090 | -2.043246 |
| 46 | 6 | 0 | -4.869305 | -2.169680 | -2.768257 |
| 47 | 6 | 0 | -5.864263 | -0.031987 | -2.293430 |
| 48 | 6 | 0 | -5.863865 | -2.415563 | -3.714190 |
| 49 | 1 | 0 | -4.101892 | -2.916904 | -2.590695 |
| 50 | 6 | 0 | -6.855562 | -0.273286 | -3.241838 |
| 51 | 1 | 0 | -5.866806 | 0.902534  | -1.736704 |

|    |   |   |           |           |           |
|----|---|---|-----------|-----------|-----------|
| 52 | 6 | 0 | -6.858861 | -1.469988 | -3.955166 |
| 53 | 1 | 0 | -5.858370 | -3.351297 | -4.265755 |
| 54 | 1 | 0 | -7.626077 | 0.471624  | -3.417853 |
| 55 | 1 | 0 | -7.631214 | -1.664189 | -4.693516 |
| 56 | 6 | 0 | -1.513133 | 0.578153  | -0.999793 |
| 57 | 8 | 0 | -0.341710 | 0.772596  | -1.455761 |
| 58 | 6 | 0 | -1.841400 | 1.197177  | 0.333217  |
| 59 | 6 | 0 | -2.862765 | 2.140447  | 0.479447  |
| 60 | 6 | 0 | -1.049815 | 0.866004  | 1.437651  |
| 61 | 6 | 0 | -3.091496 | 2.745121  | 1.714157  |
| 62 | 1 | 0 | -3.462825 | 2.417893  | -0.384476 |
| 63 | 6 | 0 | -1.285649 | 1.461364  | 2.674351  |
| 64 | 1 | 0 | -0.247233 | 0.143566  | 1.316912  |
| 65 | 6 | 0 | -2.305379 | 2.403494  | 2.813760  |
| 66 | 1 | 0 | -3.877413 | 3.487776  | 1.815772  |
| 67 | 1 | 0 | -0.670363 | 1.195845  | 3.529196  |
| 68 | 1 | 0 | -2.482088 | 2.874507  | 3.776376  |
| 69 | 6 | 0 | 0.537130  | 5.649295  | 1.284141  |
| 70 | 6 | 0 | -0.432233 | 6.115193  | 0.394961  |
| 71 | 6 | 0 | -0.846830 | 5.288481  | -0.648714 |
| 72 | 6 | 0 | -0.307158 | 4.014748  | -0.807629 |
| 73 | 6 | 0 | 0.660093  | 3.544245  | 0.093203  |
| 74 | 6 | 0 | 1.078980  | 4.375913  | 1.140508  |
| 75 | 1 | 0 | 0.870621  | 6.280661  | 2.103473  |
| 76 | 1 | 0 | -0.856709 | 7.107332  | 0.513064  |
| 77 | 1 | 0 | -1.598409 | 5.637482  | -1.352097 |

|    |   |   |           |          |           |
|----|---|---|-----------|----------|-----------|
| 78 | 1 | 0 | -0.627559 | 3.369990 | -1.621523 |
| 79 | 1 | 0 | 1.825757  | 4.001148 | 1.834530  |
| 80 | 8 | 0 | 1.214919  | 2.323196 | -0.016372 |
| 81 | 1 | 0 | 0.635225  | 1.736253 | -0.592853 |

-----

**TS2/3a\_PhOH(RRS)**

SCF Done: E(RM062X) = -1896.57572623

Imaginary Frequencies = -1141.5594

-----

| Center<br>Number | Atomic<br>Number | Atomic<br>Type | Coordinates (Angstroms) |           |           |
|------------------|------------------|----------------|-------------------------|-----------|-----------|
|                  |                  |                | X                       | Y         | Z         |
| 1                | 6                | 0              | 0.793616                | 0.519567  | 0.218685  |
| 2                | 6                | 0              | -0.257811               | 1.418792  | -0.433326 |
| 3                | 1                | 0              | 1.057841                | 0.837472  | 1.231115  |
| 4                | 1                | 0              | -1.261942               | 1.045948  | -0.239352 |
| 5                | 1                | 0              | -0.087826               | 1.447287  | -1.512598 |
| 6                | 6                | 0              | 2.067254                | 0.530340  | -0.608166 |
| 7                | 8                | 0              | 2.109393                | 0.549535  | -1.811730 |
| 8                | 8                | 0              | 3.153545                | 0.489257  | 0.191965  |
| 9                | 6                | 0              | 4.410735                | 0.350675  | -0.398321 |
| 10               | 6                | 0              | 4.920917                | 1.335708  | -1.234671 |
| 11               | 6                | 0              | 5.139765                | -0.779907 | -0.058010 |
| 12               | 6                | 0              | 6.203362                | 1.168028  | -1.751854 |
| 13               | 1                | 0              | 4.325275                | 2.210583  | -1.474488 |

|    |   |   |           |           |           |
|----|---|---|-----------|-----------|-----------|
| 14 | 6 | 0 | 6.422774  | -0.932747 | -0.579873 |
| 15 | 1 | 0 | 4.698845  | -1.515417 | 0.608655  |
| 16 | 6 | 0 | 6.953343  | 0.037044  | -1.428701 |
| 17 | 1 | 0 | 6.616577  | 1.925861  | -2.410332 |
| 18 | 1 | 0 | 7.004705  | -1.812006 | -0.321257 |
| 19 | 1 | 0 | 7.951787  | -0.085346 | -1.836800 |
| 20 | 6 | 0 | 0.938117  | 4.936969  | 0.522799  |
| 21 | 6 | 0 | 1.046266  | 3.528048  | -0.112632 |
| 22 | 1 | 0 | 1.380964  | 5.674686  | -0.150228 |
| 23 | 1 | 0 | 1.478194  | 4.965742  | 1.472565  |
| 24 | 1 | 0 | 1.257647  | 3.556791  | -1.184790 |
| 25 | 1 | 0 | 1.797540  | 2.919595  | 0.395632  |
| 26 | 6 | 0 | -1.227673 | 5.084376  | -0.450630 |
| 27 | 1 | 0 | -2.235901 | 5.484086  | -0.318736 |
| 28 | 1 | 0 | -0.739605 | 5.634177  | -1.259352 |
| 29 | 6 | 0 | -1.306989 | 3.581055  | -0.792035 |
| 30 | 1 | 0 | -2.275998 | 3.138954  | -0.543910 |
| 31 | 1 | 0 | -1.074491 | 3.375944  | -1.838201 |
| 32 | 6 | 0 | -0.713648 | 2.928063  | 1.490388  |
| 33 | 1 | 0 | -1.593169 | 2.284523  | 1.593828  |
| 34 | 1 | 0 | 0.105603  | 2.529435  | 2.090613  |
| 35 | 6 | 0 | -0.994676 | 4.412905  | 1.819462  |
| 36 | 1 | 0 | -2.070601 | 4.591040  | 1.895353  |
| 37 | 1 | 0 | -0.534004 | 4.666265  | 2.777233  |
| 38 | 7 | 0 | -0.458624 | 5.292073  | 0.777472  |
| 39 | 7 | 0 | -0.283644 | 2.843043  | 0.042722  |

|    |   |   |           |           |           |
|----|---|---|-----------|-----------|-----------|
| 40 | 6 | 0 | -0.849178 | -1.021469 | 1.396416  |
| 41 | 6 | 0 | 0.226358  | -0.939531 | 0.292028  |
| 42 | 1 | 0 | -0.274422 | -1.111531 | -0.669855 |
| 43 | 6 | 0 | -0.433539 | -0.444648 | 2.656597  |
| 44 | 7 | 0 | -0.117893 | 0.093531  | 3.635819  |
| 45 | 6 | 0 | 1.331625  | -1.985229 | 0.411936  |
| 46 | 6 | 0 | 1.799675  | -2.452097 | 1.644002  |
| 47 | 6 | 0 | 1.897783  | -2.509007 | -0.758542 |
| 48 | 6 | 0 | 2.798459  | -3.423798 | 1.702163  |
| 49 | 1 | 0 | 1.383754  | -2.070966 | 2.572046  |
| 50 | 6 | 0 | 2.892985  | -3.481669 | -0.702690 |
| 51 | 1 | 0 | 1.536797  | -2.162104 | -1.724465 |
| 52 | 6 | 0 | 3.344962  | -3.945814 | 0.531354  |
| 53 | 1 | 0 | 3.143000  | -3.778987 | 2.668948  |
| 54 | 1 | 0 | 3.307260  | -3.881372 | -1.623621 |
| 55 | 1 | 0 | 4.115367  | -4.709765 | 0.581482  |
| 56 | 6 | 0 | -1.597183 | -2.297372 | 1.629449  |
| 57 | 8 | 0 | -1.868947 | -2.679281 | 2.756982  |
| 58 | 6 | 0 | -2.263866 | -2.957417 | 0.452119  |
| 59 | 6 | 0 | -1.607061 | -3.397031 | -0.699967 |
| 60 | 6 | 0 | -3.654328 | -3.093532 | 0.545157  |
| 61 | 6 | 0 | -2.338422 | -3.943213 | -1.753848 |
| 62 | 1 | 0 | -0.525997 | -3.342839 | -0.774616 |
| 63 | 6 | 0 | -4.383117 | -3.621769 | -0.514874 |
| 64 | 1 | 0 | -4.159207 | -2.758265 | 1.446711  |
| 65 | 6 | 0 | -3.725525 | -4.042597 | -1.670501 |



|    |   |   |           |           |           |
|----|---|---|-----------|-----------|-----------|
| 66 | 1 | 0 | -1.819453 | -4.290799 | -2.642275 |
| 67 | 1 | 0 | -5.463513 | -3.703354 | -0.440841 |
| 68 | 1 | 0 | -4.291992 | -4.455036 | -2.500371 |
| 69 | 6 | 0 | -5.269122 | 0.778122  | -2.430206 |
| 70 | 6 | 0 | -5.604261 | 1.495686  | -1.279421 |
| 71 | 6 | 0 | -4.835090 | 1.397657  | -0.125258 |
| 72 | 6 | 0 | -3.690392 | 0.565524  | -0.070981 |
| 73 | 6 | 0 | -3.359190 | -0.143830 | -1.251528 |
| 74 | 6 | 0 | -4.138976 | -0.040081 | -2.399213 |
| 75 | 8 | 0 | -2.977898 | 0.494777  | 1.033990  |
| 76 | 1 | 0 | -1.890674 | -0.287418 | 1.092177  |
| 77 | 1 | 0 | -6.479376 | 2.141577  | -1.280827 |
| 78 | 1 | 0 | -5.100036 | 1.956733  | 0.768686  |
| 79 | 1 | 0 | -2.486550 | -0.794405 | -1.243958 |
| 80 | 1 | 0 | -3.857405 | -0.610742 | -3.281550 |
| 81 | 1 | 0 | -5.874328 | 0.854004  | -3.328211 |

-----

**TS2/3a\_PhOH(RSR)**

SCF Done: E(RM062X) = -1896.58019638

Imaginary Frequencies = -1102.1773

-----

| Center<br>Number | Atomic<br>Number | Atomic<br>Type | Coordinates (Angstroms) |          |          |
|------------------|------------------|----------------|-------------------------|----------|----------|
|                  |                  |                | X                       | Y        | Z        |
| 1                | 6                | 0              | -0.185941               | 1.619457 | 0.818791 |

-----

|    |   |   |           |           |           |
|----|---|---|-----------|-----------|-----------|
| 2  | 6 | 0 | 0.709092  | 0.379166  | 1.044777  |
| 3  | 1 | 0 | 1.602473  | 0.564748  | 0.441479  |
| 4  | 6 | 0 | -1.329243 | 1.685855  | 1.700993  |
| 5  | 7 | 0 | -2.279141 | 1.688782  | 2.368600  |
| 6  | 6 | 0 | 1.194579  | 0.205093  | 2.485601  |
| 7  | 6 | 0 | 1.162729  | 1.267876  | 3.396423  |
| 8  | 6 | 0 | 1.757639  | -1.005521 | 2.913419  |
| 9  | 6 | 0 | 1.671327  | 1.125277  | 4.686951  |
| 10 | 1 | 0 | 0.740728  | 2.226802  | 3.112180  |
| 11 | 6 | 0 | 2.263232  | -1.150727 | 4.202814  |
| 12 | 1 | 0 | 1.810529  | -1.857481 | 2.242601  |
| 13 | 6 | 0 | 2.222188  | -0.084485 | 5.098125  |
| 14 | 1 | 0 | 1.631597  | 1.968099  | 5.370739  |
| 15 | 1 | 0 | 2.690070  | -2.102562 | 4.505327  |
| 16 | 1 | 0 | 2.615707  | -0.196269 | 6.103897  |
| 17 | 6 | 0 | 0.502640  | 2.940341  | 0.710551  |
| 18 | 8 | 0 | 0.090755  | 3.943232  | 1.279562  |
| 19 | 6 | 0 | 1.695898  | 3.032060  | -0.194906 |
| 20 | 6 | 0 | 1.805356  | 2.257938  | -1.356297 |
| 21 | 6 | 0 | 2.699242  | 3.952377  | 0.122699  |
| 22 | 6 | 0 | 2.919335  | 2.395360  | -2.180204 |
| 23 | 1 | 0 | 1.007600  | 1.572799  | -1.633423 |
| 24 | 6 | 0 | 3.817097  | 4.077346  | -0.696005 |
| 25 | 1 | 0 | 2.596133  | 4.557475  | 1.018871  |
| 26 | 6 | 0 | 3.928851  | 3.297048  | -1.847004 |
| 27 | 1 | 0 | 2.996452  | 1.798438  | -3.084250 |

|    |   |   |           |           |           |
|----|---|---|-----------|-----------|-----------|
| 28 | 1 | 0 | 4.601590  | 4.782597  | -0.438381 |
| 29 | 1 | 0 | 4.801312  | 3.395161  | -2.486402 |
| 30 | 6 | 0 | 0.054852  | -0.901297 | 0.425138  |
| 31 | 6 | 0 | -0.910411 | -1.615476 | 1.373833  |
| 32 | 1 | 0 | -0.475371 | -0.540483 | -0.464105 |
| 33 | 1 | 0 | -1.270581 | -0.936069 | 2.150151  |
| 34 | 1 | 0 | -0.429327 | -2.470485 | 1.854589  |
| 35 | 6 | 0 | 1.107733  | -1.846163 | -0.130835 |
| 36 | 8 | 0 | 1.281479  | -2.998318 | 0.178552  |
| 37 | 8 | 0 | 1.832493  | -1.209373 | -1.077787 |
| 38 | 6 | 0 | 2.912408  | -1.882592 | -1.652404 |
| 39 | 6 | 0 | 2.827369  | -2.221817 | -2.994796 |
| 40 | 6 | 0 | 4.053460  | -2.126167 | -0.898345 |
| 41 | 6 | 0 | 3.926983  | -2.826513 | -3.601829 |
| 42 | 1 | 0 | 1.917781  | -2.007363 | -3.546841 |
| 43 | 6 | 0 | 5.142326  | -2.735392 | -1.516193 |
| 44 | 1 | 0 | 4.083029  | -1.836375 | 0.148049  |
| 45 | 6 | 0 | 5.081206  | -3.085110 | -2.865413 |
| 46 | 1 | 0 | 3.877899  | -3.094387 | -4.652755 |
| 47 | 1 | 0 | 6.041786  | -2.934109 | -0.941639 |
| 48 | 1 | 0 | 5.934674  | -3.556809 | -3.342224 |
| 49 | 6 | 0 | -4.282352 | -3.349135 | 1.162103  |
| 50 | 6 | 0 | -2.899814 | -2.978095 | 1.742654  |
| 51 | 1 | 0 | -5.066843 | -2.741334 | 1.620118  |
| 52 | 1 | 0 | -4.493962 | -4.400917 | 1.369633  |
| 53 | 1 | 0 | -2.971724 | -2.368824 | 2.645352  |

|    |   |   |           |           |           |
|----|---|---|-----------|-----------|-----------|
| 54 | 1 | 0 | -2.279150 | -3.853952 | 1.943794  |
| 55 | 6 | 0 | -4.231045 | -1.683284 | -0.537751 |
| 56 | 1 | 0 | -4.093219 | -1.533491 | -1.611966 |
| 57 | 1 | 0 | -5.169710 | -1.207812 | -0.242249 |
| 58 | 6 | 0 | -3.064480 | -1.047920 | 0.252398  |
| 59 | 1 | 0 | -2.475723 | -0.360498 | -0.359700 |
| 60 | 1 | 0 | -3.397064 | -0.533803 | 1.157277  |
| 61 | 6 | 0 | -1.837262 | -3.056840 | -0.453899 |
| 62 | 1 | 0 | -1.443088 | -2.419947 | -1.249627 |
| 63 | 1 | 0 | -1.065946 | -3.754313 | -0.124847 |
| 64 | 6 | 0 | -3.141644 | -3.769965 | -0.882157 |
| 65 | 1 | 0 | -3.229845 | -3.741302 | -1.970743 |
| 66 | 1 | 0 | -3.125783 | -4.815410 | -0.563754 |
| 67 | 7 | 0 | -4.311446 | -3.124026 | -0.284322 |
| 68 | 7 | 0 | -2.152450 | -2.159359 | 0.716240  |
| 69 | 6 | 0 | -4.841739 | 3.187191  | -2.193481 |
| 70 | 6 | 0 | -4.600082 | 1.948530  | -2.791578 |
| 71 | 6 | 0 | -3.407620 | 1.269896  | -2.566123 |
| 72 | 6 | 0 | -2.400973 | 1.810813  | -1.734021 |
| 73 | 6 | 0 | -2.657383 | 3.069306  | -1.141621 |
| 74 | 6 | 0 | -3.858598 | 3.735105  | -1.369024 |
| 75 | 8 | 0 | -1.280839 | 1.140839  | -1.526498 |
| 76 | 1 | 0 | -0.725385 | 1.464477  | -0.360498 |
| 77 | 1 | 0 | -5.350605 | 1.504551  | -3.441543 |
| 78 | 1 | 0 | -3.217887 | 0.306852  | -3.034392 |
| 79 | 1 | 0 | -1.900363 | 3.521357  | -0.503756 |

|    |   |   |           |          |           |
|----|---|---|-----------|----------|-----------|
| 80 | 1 | 0 | -4.024857 | 4.700499 | -0.896710 |
| 81 | 1 | 0 | -5.774492 | 3.714123 | -2.368814 |

---

**TS2/3a\_PhOH(SRS)**

SCF Done: E(RM062X) = -1896.57673824

Imaginary Frequencies = -1216.9173

---

| Center<br>Number | Atomic<br>Number | Atomic<br>Type | Coordinates (Angstroms) |           |           |
|------------------|------------------|----------------|-------------------------|-----------|-----------|
|                  |                  |                | X                       | Y         | Z         |
| 1                | 6                | 0              | 0.588453                | -1.875168 | -1.111958 |
| 2                | 6                | 0              | 0.834300                | -1.134321 | 0.217540  |
| 3                | 1                | 0              | 1.631774                | -0.421926 | -0.010439 |
| 4                | 6                | 0              | -0.330686               | -2.983563 | -1.008674 |
| 5                | 7                | 0              | -1.106034               | -3.844260 | -0.925364 |
| 6                | 6                | 0              | 1.346280                | -2.007014 | 1.364943  |
| 7                | 6                | 0              | 1.857572                | -3.290990 | 1.145046  |
| 8                | 6                | 0              | 1.375136                | -1.508514 | 2.675440  |
| 9                | 6                | 0              | 2.381169                | -4.046059 | 2.194534  |
| 10               | 1                | 0              | 1.855187                | -3.723782 | 0.149669  |
| 11               | 6                | 0              | 1.896053                | -2.260113 | 3.724688  |
| 12               | 1                | 0              | 0.983326                | -0.520562 | 2.903227  |
| 13               | 6                | 0              | 2.403971                | -3.535785 | 3.488527  |
| 14               | 1                | 0              | 2.770407                | -5.039842 | 1.992982  |
| 15               | 1                | 0              | 1.902788                | -1.845200 | 4.728326  |

|    |   |   |           |           |           |
|----|---|---|-----------|-----------|-----------|
| 16 | 1 | 0 | 2.810474  | -4.124718 | 4.305225  |
| 17 | 6 | 0 | 1.802510  | -2.287291 | -1.875856 |
| 18 | 8 | 0 | 1.914880  | -3.390128 | -2.395369 |
| 19 | 6 | 0 | 2.908481  | -1.284288 | -2.029776 |
| 20 | 6 | 0 | 2.644955  | 0.057139  | -2.320487 |
| 21 | 6 | 0 | 4.229476  | -1.725130 | -1.915286 |
| 22 | 6 | 0 | 3.697140  | 0.954618  | -2.482766 |
| 23 | 1 | 0 | 1.616425  | 0.380512  | -2.454988 |
| 24 | 6 | 0 | 5.279278  | -0.822756 | -2.060388 |
| 25 | 1 | 0 | 4.423451  | -2.772619 | -1.702071 |
| 26 | 6 | 0 | 5.013936  | 0.517451  | -2.342919 |
| 27 | 1 | 0 | 3.488354  | 1.993602  | -2.720780 |
| 28 | 1 | 0 | 6.304801  | -1.164330 | -1.956205 |
| 29 | 1 | 0 | 5.833526  | 1.220401  | -2.459509 |
| 30 | 6 | 0 | -0.391477 | -0.255682 | 0.614949  |
| 31 | 6 | 0 | -1.485457 | -0.997860 | 1.391504  |
| 32 | 1 | 0 | -0.795872 | 0.107557  | -0.333649 |
| 33 | 1 | 0 | -1.373493 | -2.079832 | 1.287694  |
| 34 | 1 | 0 | -1.443131 | -0.744952 | 2.452988  |
| 35 | 6 | 0 | 0.014614  | 1.024853  | 1.338995  |
| 36 | 8 | 0 | -0.557156 | 1.510265  | 2.282703  |
| 37 | 8 | 0 | 1.098527  | 1.583265  | 0.757380  |
| 38 | 6 | 0 | 1.604180  | 2.783255  | 1.259899  |
| 39 | 6 | 0 | 2.049846  | 2.874012  | 2.573101  |
| 40 | 6 | 0 | 1.716746  | 3.841807  | 0.369052  |
| 41 | 6 | 0 | 2.608623  | 4.074461  | 3.003954  |

|    |   |   |           |           |           |
|----|---|---|-----------|-----------|-----------|
| 42 | 1 | 0 | 1.965401  | 2.021548  | 3.239353  |
| 43 | 6 | 0 | 2.282038  | 5.035650  | 0.813849  |
| 44 | 1 | 0 | 1.373627  | 3.722783  | -0.654432 |
| 45 | 6 | 0 | 2.723357  | 5.155298  | 2.129894  |
| 46 | 1 | 0 | 2.959700  | 4.161254  | 4.027555  |
| 47 | 1 | 0 | 2.376451  | 5.870117  | 0.125988  |
| 48 | 1 | 0 | 3.160612  | 6.087227  | 2.474332  |
| 49 | 6 | 0 | -3.824500 | -1.283251 | 2.010320  |
| 50 | 6 | 0 | -5.277491 | -1.213298 | 1.491909  |
| 51 | 1 | 0 | -3.494523 | -2.307241 | 2.196139  |
| 52 | 1 | 0 | -3.668516 | -0.682211 | 2.908735  |
| 53 | 1 | 0 | -5.627186 | -2.205938 | 1.196919  |
| 54 | 1 | 0 | -5.929316 | -0.838359 | 2.284786  |
| 55 | 6 | 0 | -3.226360 | -1.371867 | -0.358254 |
| 56 | 1 | 0 | -2.465504 | -1.074868 | -1.087054 |
| 57 | 1 | 0 | -3.145573 | -2.445833 | -0.181187 |
| 58 | 6 | 0 | -4.648893 | -0.944826 | -0.785958 |
| 59 | 1 | 0 | -4.598750 | -0.218599 | -1.600503 |
| 60 | 1 | 0 | -5.199997 | -1.822278 | -1.133373 |
| 61 | 6 | 0 | -4.727311 | 0.944663  | 0.654336  |
| 62 | 1 | 0 | -4.910974 | 1.659252  | -0.152718 |
| 63 | 1 | 0 | -5.178267 | 1.332954  | 1.571326  |
| 64 | 6 | 0 | -3.200654 | 0.769837  | 0.836176  |
| 65 | 1 | 0 | -2.646377 | 1.137159  | -0.032880 |
| 66 | 1 | 0 | -2.827550 | 1.247722  | 1.741772  |
| 67 | 7 | 0 | -2.904305 | -0.706198 | 0.957665  |

|    |   |   |           |           |           |
|----|---|---|-----------|-----------|-----------|
| 68 | 7 | 0 | -5.369370 | -0.329775 | 0.329136  |
| 69 | 6 | 0 | -2.756260 | 3.201694  | -2.108282 |
| 70 | 6 | 0 | -3.361505 | 2.144717  | -2.793102 |
| 71 | 6 | 0 | -2.670030 | 0.961929  | -3.034089 |
| 72 | 6 | 0 | -1.335959 | 0.785873  | -2.599726 |
| 73 | 6 | 0 | -0.727553 | 1.880798  | -1.941628 |
| 74 | 6 | 0 | -1.432989 | 3.055650  | -1.690541 |
| 75 | 8 | 0 | -0.723518 | -0.367061 | -2.813966 |
| 76 | 1 | 0 | -0.046688 | -1.003541 | -1.942631 |
| 77 | 1 | 0 | -4.388817 | 2.239655  | -3.138332 |
| 78 | 1 | 0 | -3.147674 | 0.135735  | -3.555433 |
| 79 | 1 | 0 | 0.301947  | 1.785999  | -1.605052 |
| 80 | 1 | 0 | -0.938797 | 3.868454  | -1.162922 |
| 81 | 1 | 0 | -3.301102 | 4.120041  | -1.912733 |

-----

**TS2/3a\_PhOH(SSR)**

SCF Done: E(RM062X) = -1896.57407125

Imaginary Frequencies = -1196.2234

-----

| Center<br>Number | Atomic<br>Number | Atomic<br>Type | Coordinates (Angstroms) |           |           |
|------------------|------------------|----------------|-------------------------|-----------|-----------|
|                  |                  |                | X                       | Y         | Z         |
| 1                | 6                | 0              | 0.347406                | -0.092322 | 0.222383  |
| 2                | 6                | 0              | 0.569283                | 0.705694  | 1.517486  |
| 3                | 1                | 0              | 0.565472                | 0.514293  | -0.662312 |



|    |   |   |           |           |           |
|----|---|---|-----------|-----------|-----------|
| 4  | 1 | 0 | -0.275421 | 1.377969  | 1.690553  |
| 5  | 1 | 0 | 0.654680  | 0.019599  | 2.365003  |
| 6  | 6 | 0 | 1.276213  | -1.299600 | 0.227808  |
| 7  | 8 | 0 | 1.351950  | -2.093948 | 1.130138  |
| 8  | 8 | 0 | 2.066617  | -1.322158 | -0.867946 |
| 9  | 6 | 0 | 3.044342  | -2.310780 | -0.976444 |
| 10 | 6 | 0 | 2.724301  | -3.662754 | -0.910689 |
| 11 | 6 | 0 | 4.342141  | -1.875188 | -1.212815 |
| 12 | 6 | 0 | 3.743198  | -4.596009 | -1.083669 |
| 13 | 1 | 0 | 1.700090  | -3.970999 | -0.736486 |
| 14 | 6 | 0 | 5.350496  | -2.821531 | -1.386299 |
| 15 | 1 | 0 | 4.550336  | -0.810437 | -1.264825 |
| 16 | 6 | 0 | 5.053691  | -4.181079 | -1.319590 |
| 17 | 1 | 0 | 3.507451  | -5.654808 | -1.036010 |
| 18 | 1 | 0 | 6.367686  | -2.491549 | -1.573894 |
| 19 | 1 | 0 | 5.839976  | -4.917237 | -1.454273 |
| 20 | 6 | 0 | 1.963972  | 2.084070  | 2.975537  |
| 21 | 6 | 0 | 3.036257  | 3.197029  | 2.973842  |
| 22 | 1 | 0 | 0.990342  | 2.440901  | 3.316347  |
| 23 | 1 | 0 | 2.258837  | 1.212616  | 3.563866  |
| 24 | 1 | 0 | 2.569431  | 4.180175  | 3.072940  |
| 25 | 1 | 0 | 3.713736  | 3.049082  | 3.818184  |
| 26 | 6 | 0 | 1.595012  | 2.803404  | 0.672565  |
| 27 | 1 | 0 | 1.277104  | 2.460105  | -0.313259 |
| 28 | 1 | 0 | 0.787591  | 3.377805  | 1.129778  |
| 29 | 6 | 0 | 2.925197  | 3.583163  | 0.626182  |

|    |   |   |           |           |           |
|----|---|---|-----------|-----------|-----------|
| 30 | 1 | 0 | 3.446499  | 3.398548  | -0.317601 |
| 31 | 1 | 0 | 2.719499  | 4.654112  | 0.701570  |
| 32 | 6 | 0 | 4.251417  | 1.802242  | 1.484456  |
| 33 | 1 | 0 | 4.960142  | 1.790009  | 0.652655  |
| 34 | 1 | 0 | 4.762608  | 1.443255  | 2.381328  |
| 35 | 6 | 0 | 3.051937  | 0.887881  | 1.142212  |
| 36 | 1 | 0 | 2.973346  | 0.716179  | 0.067386  |
| 37 | 1 | 0 | 3.089549  | -0.064796 | 1.675719  |
| 38 | 7 | 0 | 1.785885  | 1.593186  | 1.556582  |
| 39 | 7 | 0 | 3.803459  | 3.174190  | 1.726360  |
| 40 | 6 | 0 | -1.581364 | -1.000185 | -1.246975 |
| 41 | 6 | 0 | -1.168487 | -0.473257 | 0.149509  |
| 42 | 1 | 0 | -1.679288 | 0.491586  | 0.254065  |
| 43 | 6 | 0 | -0.755481 | -2.037130 | -1.814796 |
| 44 | 7 | 0 | -0.099887 | -2.848760 | -2.325403 |
| 45 | 6 | 0 | -1.657244 | -1.340976 | 1.302388  |
| 46 | 6 | 0 | -1.613689 | -2.738705 | 1.250486  |
| 47 | 6 | 0 | -2.233816 | -0.733022 | 2.422501  |
| 48 | 6 | 0 | -2.118572 | -3.504490 | 2.298137  |
| 49 | 1 | 0 | -1.187131 | -3.239081 | 0.385036  |
| 50 | 6 | 0 | -2.737045 | -1.495968 | 3.474688  |
| 51 | 1 | 0 | -2.310585 | 0.352046  | 2.458844  |
| 52 | 6 | 0 | -2.679655 | -2.886277 | 3.415146  |
| 53 | 1 | 0 | -2.076965 | -4.588256 | 2.239173  |
| 54 | 1 | 0 | -3.186935 | -1.003593 | 4.331919  |
| 55 | 1 | 0 | -3.077622 | -3.486003 | 4.228504  |

|    |   |   |           |           |           |
|----|---|---|-----------|-----------|-----------|
| 56 | 6 | 0 | -3.014982 | -1.415403 | -1.320265 |
| 57 | 8 | 0 | -3.385218 | -2.476236 | -1.798498 |
| 58 | 6 | 0 | -4.035358 | -0.452717 | -0.783957 |
| 59 | 6 | 0 | -4.116062 | 0.846480  | -1.286747 |
| 60 | 6 | 0 | -4.941951 | -0.888148 | 0.185582  |
| 61 | 6 | 0 | -5.100945 | 1.712960  | -0.813841 |
| 62 | 1 | 0 | -3.415898 | 1.164889  | -2.055798 |
| 63 | 6 | 0 | -5.910430 | -0.014133 | 0.670902  |
| 64 | 1 | 0 | -4.870323 | -1.903900 | 0.566812  |
| 65 | 6 | 0 | -5.990900 | 1.286200  | 0.170357  |
| 66 | 1 | 0 | -5.170382 | 2.720645  | -1.213413 |
| 67 | 1 | 0 | -6.604392 | -0.347269 | 1.436934  |
| 68 | 1 | 0 | -6.750066 | 1.965729  | 0.546385  |
| 69 | 6 | 0 | 0.235154  | 4.793917  | -1.526364 |
| 70 | 6 | 0 | -0.869499 | 4.185041  | -0.929970 |
| 71 | 6 | 0 | -1.288316 | 2.914363  | -1.315139 |
| 72 | 6 | 0 | -0.626879 | 2.204301  | -2.348429 |
| 73 | 6 | 0 | 0.500012  | 2.835485  | -2.932738 |
| 74 | 6 | 0 | 0.916747  | 4.099659  | -2.530196 |
| 75 | 8 | 0 | -1.019984 | 1.029518  | -2.797265 |
| 76 | 1 | 0 | -1.374355 | 0.076426  | -2.017561 |
| 77 | 1 | 0 | -1.412608 | 4.703991  | -0.142951 |
| 78 | 1 | 0 | -2.154712 | 2.466305  | -0.836778 |
| 79 | 1 | 0 | 1.023989  | 2.303284  | -3.722433 |
| 80 | 1 | 0 | 1.782477  | 4.552334  | -3.008708 |
| 81 | 1 | 0 | 0.556092  | 5.785029  | -1.220399 |

-----  
**3a\_PhOH(RRS)**

SCF Done: E(RM062X) = -1896.59381605  
-----

| Center<br>Number | Atomic<br>Number | Atomic<br>Type | Coordinates (Angstroms) |           |           |
|------------------|------------------|----------------|-------------------------|-----------|-----------|
|                  |                  |                | X                       | Y         | Z         |
| 1                | 6                | 0              | -0.736786               | -0.539813 | 0.173114  |
| 2                | 6                | 0              | 0.533503                | -1.138519 | -0.436468 |
| 3                | 1                | 0              | -0.939517               | -0.926479 | 1.175733  |
| 4                | 1                | 0              | 1.422743                | -0.544570 | -0.195525 |
| 5                | 1                | 0              | 0.423174                | -1.200076 | -1.523267 |
| 6                | 6                | 0              | -1.939029               | -0.837481 | -0.707514 |
| 7                | 8                | 0              | -1.970008               | -0.655619 | -1.896991 |
| 8                | 8                | 0              | -2.975980               | -1.306954 | 0.018499  |
| 9                | 6                | 0              | -4.226740               | -1.402092 | -0.593217 |
| 10               | 6                | 0              | -4.855493               | -2.638147 | -0.582297 |
| 11               | 6                | 0              | -4.837199               | -0.265824 | -1.113465 |
| 12               | 6                | 0              | -6.140882               | -2.740039 | -1.112639 |
| 13               | 1                | 0              | -4.344953               | -3.497624 | -0.159094 |
| 14               | 6                | 0              | -6.118485               | -0.384480 | -1.644717 |
| 15               | 1                | 0              | -4.312949               | 0.686280  | -1.101543 |
| 16               | 6                | 0              | -6.771327               | -1.617531 | -1.645023 |
| 17               | 1                | 0              | -6.646819               | -3.700571 | -1.108121 |
| 18               | 1                | 0              | -6.607920               | 0.492755  | -2.056667 |

|    |   |   |           |           |           |
|----|---|---|-----------|-----------|-----------|
| 19 | 1 | 0 | -7.771342 | -1.701895 | -2.058778 |
| 20 | 6 | 0 | 0.254124  | -4.913712 | 0.146668  |
| 21 | 6 | 0 | -0.280479 | -3.483763 | -0.115636 |
| 22 | 1 | 0 | 0.349996  | -5.462353 | -0.793823 |
| 23 | 1 | 0 | -0.446309 | -5.450391 | 0.790808  |
| 24 | 1 | 0 | -0.670460 | -3.362388 | -1.129820 |
| 25 | 1 | 0 | -1.042653 | -3.193287 | 0.611302  |
| 26 | 6 | 0 | 2.544162  | -4.335618 | -0.161757 |
| 27 | 1 | 0 | 3.482950  | -4.156247 | 0.369834  |
| 28 | 1 | 0 | 2.726508  | -5.072955 | -0.947201 |
| 29 | 6 | 0 | 2.023857  | -3.027176 | -0.791872 |
| 30 | 1 | 0 | 2.776743  | -2.236187 | -0.807017 |
| 31 | 1 | 0 | 1.628049  | -3.172948 | -1.799433 |
| 32 | 6 | 0 | 1.307322  | -2.506605 | 1.487998  |
| 33 | 1 | 0 | 2.218235  | -1.900944 | 1.509421  |
| 34 | 1 | 0 | 0.532442  | -2.003418 | 2.067904  |
| 35 | 6 | 0 | 1.502328  | -3.969933 | 1.944285  |
| 36 | 1 | 0 | 2.428153  | -4.051712 | 2.519039  |
| 37 | 1 | 0 | 0.671424  | -4.288992 | 2.579154  |
| 38 | 7 | 0 | 1.568763  | -4.870606 | 0.790601  |
| 39 | 7 | 0 | 0.867148  | -2.522700 | 0.041663  |
| 40 | 6 | 0 | 0.452481  | 1.408190  | 1.352489  |
| 41 | 6 | 0 | -0.586437 | 1.005046  | 0.252045  |
| 42 | 1 | 0 | -0.157478 | 1.338609  | -0.700573 |
| 43 | 6 | 0 | 0.057038  | 0.918025  | 2.675319  |
| 44 | 7 | 0 | -0.246353 | 0.478098  | 3.700578  |

|    |   |   |           |           |           |
|----|---|---|-----------|-----------|-----------|
| 45 | 6 | 0 | -1.913236 | 1.720809  | 0.441946  |
| 46 | 6 | 0 | -2.802968 | 1.358392  | 1.460488  |
| 47 | 6 | 0 | -2.258334 | 2.770341  | -0.414161 |
| 48 | 6 | 0 | -4.009931 | 2.034303  | 1.617565  |
| 49 | 1 | 0 | -2.564198 | 0.536989  | 2.130033  |
| 50 | 6 | 0 | -3.466536 | 3.448904  | -0.256517 |
| 51 | 1 | 0 | -1.574370 | 3.056011  | -1.210536 |
| 52 | 6 | 0 | -4.345155 | 3.081367  | 0.760288  |
| 53 | 1 | 0 | -4.690925 | 1.738032  | 2.409904  |
| 54 | 1 | 0 | -3.719617 | 4.262402  | -0.929984 |
| 55 | 1 | 0 | -5.288445 | 3.605211  | 0.883236  |
| 56 | 6 | 0 | 0.571438  | 2.939166  | 1.378955  |
| 57 | 8 | 0 | 0.034247  | 3.585446  | 2.253627  |
| 58 | 6 | 0 | 1.297314  | 3.583595  | 0.248255  |
| 59 | 6 | 0 | 2.292200  | 2.912237  | -0.472108 |
| 60 | 6 | 0 | 0.966514  | 4.905879  | -0.072111 |
| 61 | 6 | 0 | 2.955893  | 3.572931  | -1.503635 |
| 62 | 1 | 0 | 2.575003  | 1.892158  | -0.210938 |
| 63 | 6 | 0 | 1.619598  | 5.551471  | -1.115072 |
| 64 | 1 | 0 | 0.189495  | 5.408635  | 0.496167  |
| 65 | 6 | 0 | 2.617439  | 4.885205  | -1.828990 |
| 66 | 1 | 0 | 3.741705  | 3.059029  | -2.049708 |
| 67 | 1 | 0 | 1.355200  | 6.572633  | -1.371908 |
| 68 | 1 | 0 | 3.132034  | 5.392274  | -2.639820 |
| 69 | 6 | 0 | 6.597851  | -0.747862 | -1.513102 |
| 70 | 6 | 0 | 6.539773  | -1.054822 | -0.149655 |

|    |   |   |          |           |           |
|----|---|---|----------|-----------|-----------|
| 71 | 6 | 0 | 5.391007 | -0.818105 | 0.594050  |
| 72 | 6 | 0 | 4.217404 | -0.248635 | 0.013085  |
| 73 | 6 | 0 | 4.304527 | 0.042511  | -1.383369 |
| 74 | 6 | 0 | 5.462746 | -0.199086 | -2.114754 |
| 75 | 8 | 0 | 3.146496 | -0.034816 | 0.703147  |
| 76 | 1 | 0 | 1.431538 | 0.955715  | 1.126718  |
| 77 | 1 | 0 | 7.408733 | -1.490015 | 0.340868  |
| 78 | 1 | 0 | 5.359655 | -1.059951 | 1.654574  |
| 79 | 1 | 0 | 3.424982 | 0.459069  | -1.873109 |
| 80 | 1 | 0 | 5.478212 | 0.040876  | -3.176503 |
| 81 | 1 | 0 | 7.499035 | -0.936453 | -2.088275 |

-----

### 3a\_PhOH(RSR)

SCF Done: E(RM062X) = -1896.59050049

-----

| Center<br>Number | Atomic<br>Number | Atomic<br>Type | Coordinates (Angstroms) |           |           |
|------------------|------------------|----------------|-------------------------|-----------|-----------|
|                  |                  |                | X                       | Y         | Z         |
| 1                | 6                | 0              | -1.029998               | -1.734212 | -1.307344 |
| 2                | 6                | 0              | -1.106175               | -1.183212 | 0.148994  |
| 3                | 1                | 0              | -1.819884               | -0.357889 | 0.084187  |
| 4                | 6                | 0              | -0.330386               | -3.017251 | -1.417172 |
| 5                | 7                | 0              | 0.253729                | -4.012123 | -1.496146 |
| 6                | 6                | 0              | -1.650395               | -2.155465 | 1.192290  |
| 7                | 6                | 0              | -2.285802               | -3.353950 | 0.850408  |

|    |   |   |           |           |           |
|----|---|---|-----------|-----------|-----------|
| 8  | 6 | 0 | -1.566909 | -1.822866 | 2.552275  |
| 9  | 6 | 0 | -2.808848 | -4.194497 | 1.833428  |
| 10 | 1 | 0 | -2.390825 | -3.654673 | -0.186287 |
| 11 | 6 | 0 | -2.087088 | -2.660604 | 3.533595  |
| 12 | 1 | 0 | -1.087133 | -0.901270 | 2.869950  |
| 13 | 6 | 0 | -2.710216 | -3.855368 | 3.178287  |
| 14 | 1 | 0 | -3.294979 | -5.119270 | 1.536886  |
| 15 | 1 | 0 | -2.003415 | -2.375912 | 4.578201  |
| 16 | 1 | 0 | -3.114791 | -4.512821 | 3.941770  |
| 17 | 6 | 0 | -2.400200 | -1.817353 | -2.000271 |
| 18 | 8 | 0 | -2.842390 | -2.877857 | -2.393235 |
| 19 | 6 | 0 | -3.151991 | -0.539390 | -2.170615 |
| 20 | 6 | 0 | -2.525210 | 0.712912  | -2.117910 |
| 21 | 6 | 0 | -4.530280 | -0.625387 | -2.398535 |
| 22 | 6 | 0 | -3.286281 | 1.867153  | -2.285695 |
| 23 | 1 | 0 | -1.445474 | 0.794650  | -1.982437 |
| 24 | 6 | 0 | -5.283429 | 0.531183  | -2.557806 |
| 25 | 1 | 0 | -4.998544 | -1.604064 | -2.442607 |
| 26 | 6 | 0 | -4.661114 | 1.778853  | -2.499109 |
| 27 | 1 | 0 | -2.801248 | 2.838357  | -2.251097 |
| 28 | 1 | 0 | -6.353658 | 0.462664  | -2.726804 |
| 29 | 1 | 0 | -5.248835 | 2.683901  | -2.622813 |
| 30 | 6 | 0 | 0.254878  | -0.523649 | 0.536110  |
| 31 | 6 | 0 | 1.257178  | -1.519410 | 1.125322  |
| 32 | 1 | 0 | 0.622111  | -0.079383 | -0.406395 |
| 33 | 1 | 0 | 0.983919  | -2.543973 | 0.862006  |



|    |   |   |           |           |           |
|----|---|---|-----------|-----------|-----------|
| 34 | 1 | 0 | 1.285691  | -1.441107 | 2.214484  |
| 35 | 6 | 0 | 0.068306  | 0.676400  | 1.449011  |
| 36 | 8 | 0 | 0.692931  | 0.906486  | 2.454627  |
| 37 | 8 | 0 | -0.900344 | 1.486913  | 0.967516  |
| 38 | 6 | 0 | -1.177212 | 2.693155  | 1.610497  |
| 39 | 6 | 0 | -0.179754 | 3.637661  | 1.827882  |
| 40 | 6 | 0 | -2.503917 | 2.934424  | 1.939822  |
| 41 | 6 | 0 | -0.532647 | 4.856831  | 2.400660  |
| 42 | 1 | 0 | 0.846612  | 3.420261  | 1.551253  |
| 43 | 6 | 0 | -2.841767 | 4.160162  | 2.509917  |
| 44 | 1 | 0 | -3.251257 | 2.171423  | 1.744897  |
| 45 | 6 | 0 | -1.858952 | 5.120426  | 2.742648  |
| 46 | 1 | 0 | 0.234977  | 5.604505  | 2.575010  |
| 47 | 1 | 0 | -3.876239 | 4.362034  | 2.770075  |
| 48 | 1 | 0 | -2.125678 | 6.074174  | 3.187306  |
| 49 | 6 | 0 | 4.961069  | -2.335327 | 0.921899  |
| 50 | 6 | 0 | 3.520111  | -2.329784 | 1.478050  |
| 51 | 1 | 0 | 5.166616  | -3.276105 | 0.405226  |
| 52 | 1 | 0 | 5.672504  | -2.229530 | 1.744611  |
| 53 | 1 | 0 | 3.038435  | -3.306470 | 1.402769  |
| 54 | 1 | 0 | 3.469802  | -1.978942 | 2.510968  |
| 55 | 6 | 0 | 4.315106  | -1.479754 | -1.199353 |
| 56 | 1 | 0 | 4.393465  | -0.612047 | -1.857562 |
| 57 | 1 | 0 | 4.688466  | -2.357697 | -1.732510 |
| 58 | 6 | 0 | 2.838016  | -1.711784 | -0.793927 |
| 59 | 1 | 0 | 2.146023  | -1.083818 | -1.366529 |

|    |   |   |           |           |           |
|----|---|---|-----------|-----------|-----------|
| 60 | 1 | 0 | 2.540267  | -2.758927 | -0.883847 |
| 61 | 6 | 0 | 3.222571  | 0.025986  | 0.899600  |
| 62 | 1 | 0 | 2.678500  | 0.695546  | 0.227169  |
| 63 | 1 | 0 | 2.996699  | 0.284866  | 1.934564  |
| 64 | 6 | 0 | 4.743043  | 0.015083  | 0.602984  |
| 65 | 1 | 0 | 4.986948  | 0.846583  | -0.063403 |
| 66 | 1 | 0 | 5.308440  | 0.135788  | 1.530720  |
| 67 | 7 | 0 | 5.155005  | -1.239873 | -0.026485 |
| 68 | 7 | 0 | 2.685020  | -1.364229 | 0.667470  |
| 69 | 6 | 0 | 3.542362  | 3.497594  | -1.620359 |
| 70 | 6 | 0 | 2.265265  | 3.573505  | -1.057303 |
| 71 | 6 | 0 | 1.310005  | 2.590152  | -1.296179 |
| 72 | 6 | 0 | 1.584372  | 1.457450  | -2.122068 |
| 73 | 6 | 0 | 2.889370  | 1.422241  | -2.700821 |
| 74 | 6 | 0 | 3.834040  | 2.410915  | -2.451918 |
| 75 | 8 | 0 | 0.724375  | 0.515198  | -2.319030 |
| 76 | 1 | 0 | -0.428182 | -1.008575 | -1.881737 |
| 77 | 1 | 0 | 2.005668  | 4.419001  | -0.421692 |
| 78 | 1 | 0 | 0.315960  | 2.671234  | -0.860730 |
| 79 | 1 | 0 | 3.123879  | 0.586412  | -3.357140 |
| 80 | 1 | 0 | 4.816406  | 2.333914  | -2.915045 |
| 81 | 1 | 0 | 4.283164  | 4.267888  | -1.430101 |

---

**3a\_PhOH(SRS)**

SCF Done: E(RM062X) = -1896.59050004

| Center<br>Number | Atomic<br>Number | Atomic<br>Type | Coordinates (Angstroms) |           |           |
|------------------|------------------|----------------|-------------------------|-----------|-----------|
|                  |                  |                | X                       | Y         | Z         |
| 1                | 6                | 0              | 1.030710                | -1.733610 | -1.308013 |
| 2                | 6                | 0              | 1.106835                | -1.183195 | 0.148571  |
| 3                | 1                | 0              | 1.820213                | -0.357564 | 0.084027  |
| 4                | 6                | 0              | 0.331699                | -3.016917 | -1.418260 |
| 5                | 7                | 0              | -0.251696               | -4.012190 | -1.497478 |
| 6                | 6                | 0              | 1.651563                | -2.155674 | 1.191393  |
| 7                | 6                | 0              | 2.287909                | -3.353508 | 0.848968  |
| 8                | 6                | 0              | 1.567593                | -1.823881 | 2.551544  |
| 9                | 6                | 0              | 2.811397                | -4.194207 | 1.831627  |
| 10               | 1                | 0              | 2.393386                | -3.653610 | -0.187859 |
| 11               | 6                | 0              | 2.088217                | -2.661766 | 3.532499  |
| 12               | 1                | 0              | 1.087068                | -0.902810 | 2.869609  |
| 13               | 6                | 0              | 2.712284                | -3.855882 | 3.176651  |
| 14               | 1                | 0              | 3.298267                | -5.118456 | 1.534670  |
| 15               | 1                | 0              | 2.004141                | -2.377719 | 4.577247  |
| 16               | 1                | 0              | 3.117202                | -4.513449 | 3.939851  |
| 17               | 6                | 0              | 2.400860                | -1.815694 | -2.001213 |
| 18               | 8                | 0              | 2.843701                | -2.875738 | -2.394631 |
| 19               | 6                | 0              | 3.151701                | -0.537106 | -2.171199 |
| 20               | 6                | 0              | 2.523957                | 0.714706  | -2.118284 |
| 21               | 6                | 0              | 4.530072                | -0.621998 | -2.398985 |
| 22               | 6                | 0              | 3.284161                | 1.869565  | -2.285768 |

|    |   |   |           |           |           |
|----|---|---|-----------|-----------|-----------|
| 23 | 1 | 0 | 1.444162  | 0.795635  | -1.982838 |
| 24 | 6 | 0 | 5.282367  | 0.535185  | -2.557891 |
| 25 | 1 | 0 | 4.999099  | -1.600299 | -2.443247 |
| 26 | 6 | 0 | 4.659094  | 1.782366  | -2.499019 |
| 27 | 1 | 0 | 2.798357  | 2.840377  | -2.251021 |
| 28 | 1 | 0 | 6.352669  | 0.467511  | -2.726750 |
| 29 | 1 | 0 | 5.246138  | 2.687890  | -2.622432 |
| 30 | 6 | 0 | -0.254434 | -0.524360 | 0.536082  |
| 31 | 6 | 0 | -1.256262 | -1.520701 | 1.125082  |
| 32 | 1 | 0 | -0.621916 | -0.080013 | -0.406305 |
| 33 | 1 | 0 | -0.982748 | -2.545069 | 0.861274  |
| 34 | 1 | 0 | -1.284637 | -1.442854 | 2.214278  |
| 35 | 6 | 0 | -0.068200 | 0.675486  | 1.449322  |
| 36 | 8 | 0 | -0.692513 | 0.904853  | 2.455292  |
| 37 | 8 | 0 | 0.899730  | 1.486732  | 0.967653  |
| 38 | 6 | 0 | 1.176300  | 2.692770  | 1.611161  |
| 39 | 6 | 0 | 2.502904  | 2.934235  | 1.940726  |
| 40 | 6 | 0 | 0.178546  | 3.636867  | 1.828927  |
| 41 | 6 | 0 | 2.840346  | 4.159774  | 2.511496  |
| 42 | 1 | 0 | 3.250473  | 2.171540  | 1.745476  |
| 43 | 6 | 0 | 0.531026  | 4.855833  | 2.402387  |
| 44 | 1 | 0 | -0.847711 | 3.419286  | 1.552027  |
| 45 | 6 | 0 | 1.857228  | 5.119620  | 2.744647  |
| 46 | 1 | 0 | 3.874732  | 4.361810  | 2.771863  |
| 47 | 1 | 0 | -0.236817 | 5.603204  | 2.577075  |
| 48 | 1 | 0 | 2.123619  | 6.073204  | 3.189855  |

|    |   |   |           |           |           |
|----|---|---|-----------|-----------|-----------|
| 49 | 6 | 0 | -3.519034 | -2.331633 | 1.477855  |
| 50 | 6 | 0 | -4.960003 | -2.337286 | 0.921726  |
| 51 | 1 | 0 | -3.037146 | -3.308185 | 1.402296  |
| 52 | 1 | 0 | -3.468742 | -1.981038 | 2.510859  |
| 53 | 1 | 0 | -5.165362 | -3.277903 | 0.404689  |
| 54 | 1 | 0 | -5.671449 | -2.231947 | 1.744479  |
| 55 | 6 | 0 | -2.837225 | -1.712725 | -0.794063 |
| 56 | 1 | 0 | -2.145032 | -1.084504 | -1.366183 |
| 57 | 1 | 0 | -2.539487 | -2.759848 | -0.884322 |
| 58 | 6 | 0 | -4.314382 | -1.480782 | -1.199286 |
| 59 | 1 | 0 | -4.393029 | -0.612858 | -1.857149 |
| 60 | 1 | 0 | -4.687607 | -2.358604 | -1.732734 |
| 61 | 6 | 0 | -4.742439 | 0.013279  | 0.603632  |
| 62 | 1 | 0 | -4.986530 | 0.844975  | -0.062437 |
| 63 | 1 | 0 | -5.307784 | 0.133555  | 1.531453  |
| 64 | 6 | 0 | -3.221940 | 0.024336  | 0.900131  |
| 65 | 1 | 0 | -2.678036 | 0.694184  | 0.227862  |
| 66 | 1 | 0 | -2.996029 | 0.282918  | 1.935156  |
| 67 | 7 | 0 | -2.684200 | -1.365706 | 0.667494  |
| 68 | 7 | 0 | -5.154202 | -1.241516 | -0.026245 |
| 69 | 6 | 0 | -3.543471 | 3.498281  | -1.619806 |
| 70 | 6 | 0 | -3.835495 | 2.411451  | -2.451063 |
| 71 | 6 | 0 | -2.891063 | 1.422534  | -2.699841 |
| 72 | 6 | 0 | -1.585978 | 1.457604  | -2.121271 |
| 73 | 6 | 0 | -1.311209 | 2.590518  | -1.295814 |
| 74 | 6 | 0 | -2.266258 | 3.574105  | -1.057018 |

|    |   |   |           |           |           |
|----|---|---|-----------|-----------|-----------|
| 75 | 8 | 0 | -0.726223 | 0.515121  | -2.318185 |
| 76 | 1 | 0 | 0.428672  | -1.007967 | -1.882119 |
| 77 | 1 | 0 | -4.817939 | 2.334550  | -2.914036 |
| 78 | 1 | 0 | -3.125743 | 0.586639  | -3.356008 |
| 79 | 1 | 0 | -0.317078 | 2.671567  | -0.860553 |
| 80 | 1 | 0 | -2.006377 | 4.419720  | -0.421684 |
| 81 | 1 | 0 | -4.284119 | 4.268735  | -1.429612 |

-----

### 3a\_PhOH(SSR)

SCF Done: E(RM062X) = -1896.59140791

-----

| Center<br>Number | Atomic<br>Number | Atomic<br>Type | Coordinates (Angstroms) |           |           |
|------------------|------------------|----------------|-------------------------|-----------|-----------|
|                  |                  |                | X                       | Y         | Z         |
| 1                | 6                | 0              | 0.022268                | 0.409037  | 0.607328  |
| 2                | 6                | 0              | -0.164973               | -0.086927 | 2.047080  |
| 3                | 1                | 0              | -0.375760               | -0.309734 | -0.120034 |
| 4                | 1                | 0              | 0.701878                | -0.662386 | 2.382364  |
| 5                | 1                | 0              | -0.318128               | 0.749262  | 2.734301  |
| 6                | 6                | 0              | -0.741713               | 1.711783  | 0.427252  |
| 7                | 8                | 0              | -0.810810               | 2.605964  | 1.232222  |
| 8                | 8                | 0              | -1.420673               | 1.697970  | -0.742272 |
| 9                | 6                | 0              | -2.328783               | 2.723604  | -1.012283 |
| 10               | 6                | 0              | -1.920129               | 4.046855  | -1.126760 |
| 11               | 6                | 0              | -3.648728               | 2.340644  | -1.214248 |

|    |   |   |           |           |           |
|----|---|---|-----------|-----------|-----------|
| 12 | 6 | 0 | -2.871934 | 5.008397  | -1.458358 |
| 13 | 1 | 0 | -0.881329 | 4.312182  | -0.966051 |
| 14 | 6 | 0 | -4.588449 | 3.313387  | -1.547901 |
| 15 | 1 | 0 | -3.924500 | 1.294440  | -1.111958 |
| 16 | 6 | 0 | -4.202164 | 4.646720  | -1.669248 |
| 17 | 1 | 0 | -2.568440 | 6.046663  | -1.551884 |
| 18 | 1 | 0 | -5.622464 | 3.025894  | -1.711778 |
| 19 | 1 | 0 | -4.935876 | 5.403864  | -1.928211 |
| 20 | 6 | 0 | -1.617614 | -1.232801 | 3.668309  |
| 21 | 6 | 0 | -2.649305 | -2.378547 | 3.788119  |
| 22 | 1 | 0 | -0.663961 | -1.473398 | 4.142199  |
| 23 | 1 | 0 | -1.990687 | -0.284513 | 4.060870  |
| 24 | 1 | 0 | -2.157059 | -3.308415 | 4.084701  |
| 25 | 1 | 0 | -3.389089 | -2.121618 | 4.550125  |
| 26 | 6 | 0 | -1.049780 | -2.353717 | 1.578567  |
| 27 | 1 | 0 | -0.620491 | -2.192053 | 0.586220  |
| 28 | 1 | 0 | -0.297586 | -2.813245 | 2.224768  |
| 29 | 6 | 0 | -2.365561 | -3.156773 | 1.546720  |
| 30 | 1 | 0 | -2.816786 | -3.115640 | 0.550127  |
| 31 | 1 | 0 | -2.158174 | -4.202243 | 1.789761  |
| 32 | 6 | 0 | -3.793819 | -1.314984 | 1.994653  |
| 33 | 1 | 0 | -4.427941 | -1.482919 | 1.119685  |
| 34 | 1 | 0 | -4.389962 | -0.827249 | 2.770115  |
| 35 | 6 | 0 | -2.596177 | -0.427150 | 1.586947  |
| 36 | 1 | 0 | -2.449669 | -0.431388 | 0.504617  |
| 37 | 1 | 0 | -2.692046 | 0.597950  | 1.953760  |

|    |   |   |           |           |           |
|----|---|---|-----------|-----------|-----------|
| 38 | 7 | 0 | -1.344646 | -1.006415 | 2.201650  |
| 39 | 7 | 0 | -3.326641 | -2.603321 | 2.507854  |
| 40 | 6 | 0 | 1.794855  | 0.687518  | -1.247241 |
| 41 | 6 | 0 | 1.537155  | 0.441631  | 0.271375  |
| 42 | 1 | 0 | 1.833936  | -0.603152 | 0.414599  |
| 43 | 6 | 0 | 1.427744  | 2.035435  | -1.688668 |
| 44 | 7 | 0 | 1.131162  | 3.097870  | -2.034115 |
| 45 | 6 | 0 | 2.418554  | 1.275204  | 1.183274  |
| 46 | 6 | 0 | 2.324712  | 2.669747  | 1.274454  |
| 47 | 6 | 0 | 3.388855  | 0.617860  | 1.947835  |
| 48 | 6 | 0 | 3.177492  | 3.380041  | 2.116094  |
| 49 | 1 | 0 | 1.587590  | 3.213526  | 0.693896  |
| 50 | 6 | 0 | 4.240803  | 1.327662  | 2.791532  |
| 51 | 1 | 0 | 3.476525  | -0.464251 | 1.877143  |
| 52 | 6 | 0 | 4.135630  | 2.713298  | 2.877826  |
| 53 | 1 | 0 | 3.090816  | 4.460950  | 2.175828  |
| 54 | 1 | 0 | 4.986244  | 0.796860  | 3.376218  |
| 55 | 1 | 0 | 4.797009  | 3.273054  | 3.532539  |
| 56 | 6 | 0 | 3.288928  | 0.471847  | -1.551853 |
| 57 | 8 | 0 | 3.993972  | 1.418118  | -1.836042 |
| 58 | 6 | 0 | 3.846587  | -0.906792 | -1.428308 |
| 59 | 6 | 0 | 5.237894  | -1.026505 | -1.316409 |
| 60 | 6 | 0 | 3.041340  | -2.052528 | -1.429840 |
| 61 | 6 | 0 | 5.823826  | -2.280569 | -1.203698 |
| 62 | 1 | 0 | 5.844959  | -0.126680 | -1.314655 |
| 63 | 6 | 0 | 3.639275  | -3.307437 | -1.326842 |



|    |   |   |           |           |           |
|----|---|---|-----------|-----------|-----------|
| 64 | 1 | 0 | 1.955669  | -1.987948 | -1.520685 |
| 65 | 6 | 0 | 5.022698  | -3.424007 | -1.210935 |
| 66 | 1 | 0 | 6.901816  | -2.369989 | -1.110030 |
| 67 | 1 | 0 | 3.018045  | -4.198240 | -1.336391 |
| 68 | 1 | 0 | 5.479482  | -4.405594 | -1.124141 |
| 69 | 6 | 0 | -3.806502 | -3.480836 | -2.131482 |
| 70 | 6 | 0 | -2.653778 | -4.266689 | -2.029673 |
| 71 | 6 | 0 | -1.400204 | -3.690798 | -1.860459 |
| 72 | 6 | 0 | -1.223756 | -2.275921 | -1.785039 |
| 73 | 6 | 0 | -2.415208 | -1.499862 | -1.920876 |
| 74 | 6 | 0 | -3.664664 | -2.090521 | -2.080292 |
| 75 | 8 | 0 | -0.072279 | -1.734998 | -1.565922 |
| 76 | 1 | 0 | 1.163686  | -0.035638 | -1.789027 |
| 77 | 1 | 0 | -2.737414 | -5.351172 | -2.076238 |
| 78 | 1 | 0 | -0.512909 | -4.315202 | -1.773101 |
| 79 | 1 | 0 | -2.312694 | -0.416148 | -1.892847 |
| 80 | 1 | 0 | -4.544748 | -1.455237 | -2.171229 |
| 81 | 1 | 0 | -4.782978 | -3.937791 | -2.258908 |

-----

**TS3a/3b\_PhOH(RRS)**

SCF Done: E(RM062X) = -1896.57540490

Imaginary Frequencies = -1174.0934

-----

| Center | Atomic | Atomic | Coordinates (Angstroms) |   |   |
|--------|--------|--------|-------------------------|---|---|
| Number | Number | Type   | X                       | Y | Z |

---

|    |   |   |           |           |           |
|----|---|---|-----------|-----------|-----------|
| 1  | 6 | 0 | 0.205502  | 0.001825  | 0.790981  |
| 2  | 6 | 0 | -0.582070 | -0.051094 | 2.085018  |
| 3  | 1 | 0 | -0.324596 | -0.699925 | -0.341802 |
| 4  | 1 | 0 | -0.928280 | 0.942909  | 2.386589  |
| 5  | 1 | 0 | 0.012234  | -0.473645 | 2.899764  |
| 6  | 6 | 0 | 1.428693  | -0.778588 | 0.890908  |
| 7  | 8 | 0 | 1.683180  | -1.650364 | 1.701824  |
| 8  | 8 | 0 | 2.255823  | -0.532736 | -0.182215 |
| 9  | 6 | 0 | 3.503505  | -1.119376 | -0.266258 |
| 10 | 6 | 0 | 3.869951  | -1.616690 | -1.513152 |
| 11 | 6 | 0 | 4.392632  | -1.133139 | 0.806288  |
| 12 | 6 | 0 | 5.146545  | -2.146239 | -1.688400 |
| 13 | 1 | 0 | 3.152806  | -1.577250 | -2.327915 |
| 14 | 6 | 0 | 5.663442  | -1.671049 | 0.618454  |
| 15 | 1 | 0 | 4.087950  | -0.739661 | 1.769708  |
| 16 | 6 | 0 | 6.044746  | -2.178274 | -0.623463 |
| 17 | 1 | 0 | 5.437114  | -2.532648 | -2.660713 |
| 18 | 1 | 0 | 6.360969  | -1.688208 | 1.450655  |
| 19 | 1 | 0 | 7.038167  | -2.594081 | -0.760005 |
| 20 | 6 | 0 | -2.828336 | -3.116700 | 1.626576  |
| 21 | 6 | 0 | -1.509846 | -2.345730 | 1.844287  |
| 22 | 1 | 0 | -2.795970 | -4.060603 | 2.176510  |
| 23 | 1 | 0 | -2.968106 | -3.339907 | 0.564237  |
| 24 | 1 | 0 | -0.970735 | -2.670135 | 2.737287  |
| 25 | 1 | 0 | -0.838444 | -2.413834 | 0.988472  |

|    |   |   |           |           |           |
|----|---|---|-----------|-----------|-----------|
| 26 | 6 | 0 | -3.685111 | -1.821384 | 3.431586  |
| 27 | 1 | 0 | -4.585686 | -1.361435 | 3.845849  |
| 28 | 1 | 0 | -3.409800 | -2.670133 | 4.063116  |
| 29 | 6 | 0 | -2.542369 | -0.780763 | 3.392501  |
| 30 | 1 | 0 | -2.906220 | 0.246976  | 3.459775  |
| 31 | 1 | 0 | -1.793269 | -0.950835 | 4.168007  |
| 32 | 6 | 0 | -2.802132 | -0.429440 | 0.997700  |
| 33 | 1 | 0 | -2.904858 | 0.652421  | 1.117295  |
| 34 | 1 | 0 | -2.338757 | -0.646665 | 0.033972  |
| 35 | 6 | 0 | -4.141653 | -1.178686 | 1.187846  |
| 36 | 1 | 0 | -4.897296 | -0.515847 | 1.617744  |
| 37 | 1 | 0 | -4.502679 | -1.531661 | 0.218242  |
| 38 | 7 | 0 | -3.973443 | -2.324674 | 2.086050  |
| 39 | 7 | 0 | -1.843535 | -0.895957 | 2.062532  |
| 40 | 6 | 0 | 0.687202  | 1.642442  | -1.250359 |
| 41 | 6 | 0 | 0.226113  | 1.444023  | 0.240877  |
| 42 | 1 | 0 | -0.835545 | 1.716584  | 0.209284  |
| 43 | 6 | 0 | 2.134239  | 1.818502  | -1.416514 |
| 44 | 7 | 0 | 3.267281  | 1.983701  | -1.574545 |
| 45 | 6 | 0 | 0.887955  | 2.473974  | 1.146602  |
| 46 | 6 | 0 | 2.157149  | 2.273320  | 1.701441  |
| 47 | 6 | 0 | 0.214340  | 3.665831  | 1.431527  |
| 48 | 6 | 0 | 2.732112  | 3.239903  | 2.522915  |
| 49 | 1 | 0 | 2.711002  | 1.362798  | 1.486255  |
| 50 | 6 | 0 | 0.786419  | 4.634964  | 2.253802  |
| 51 | 1 | 0 | -0.773098 | 3.831516  | 1.003892  |

|    |   |   |           |           |           |
|----|---|---|-----------|-----------|-----------|
| 52 | 6 | 0 | 2.048199  | 4.422496  | 2.803557  |
| 53 | 1 | 0 | 3.717500  | 3.068409  | 2.946466  |
| 54 | 1 | 0 | 0.243852  | 5.551312  | 2.467405  |
| 55 | 1 | 0 | 2.496835  | 5.171963  | 3.448883  |
| 56 | 6 | 0 | 0.004539  | 2.908172  | -1.806970 |
| 57 | 8 | 0 | 0.647795  | 3.919670  | -1.996887 |
| 58 | 6 | 0 | -1.472696 | 2.878585  | -2.043261 |
| 59 | 6 | 0 | -2.213353 | 1.691466  | -2.068503 |
| 60 | 6 | 0 | -2.118053 | 4.105811  | -2.237245 |
| 61 | 6 | 0 | -3.589293 | 1.739845  | -2.281278 |
| 62 | 1 | 0 | -1.731779 | 0.725240  | -1.933149 |
| 63 | 6 | 0 | -3.491081 | 4.148663  | -2.446957 |
| 64 | 1 | 0 | -1.529678 | 5.017717  | -2.215530 |
| 65 | 6 | 0 | -4.228938 | 2.964125  | -2.467470 |
| 66 | 1 | 0 | -4.161342 | 0.816437  | -2.302109 |
| 67 | 1 | 0 | -3.987596 | 5.103171  | -2.592141 |
| 68 | 1 | 0 | -5.302329 | 2.996654  | -2.629746 |
| 69 | 6 | 0 | -0.939784 | -5.189694 | -2.009483 |
| 70 | 6 | 0 | 0.182901  | -4.621351 | -1.408784 |
| 71 | 6 | 0 | 0.267088  | -3.245410 | -1.208881 |
| 72 | 6 | 0 | -0.790143 | -2.399849 | -1.595902 |
| 73 | 6 | 0 | -1.919678 | -2.982829 | -2.202118 |
| 74 | 6 | 0 | -1.987064 | -4.357246 | -2.408773 |
| 75 | 8 | 0 | -0.752128 | -1.078892 | -1.405401 |
| 76 | 1 | 0 | 0.386771  | 0.759972  | -1.827792 |
| 77 | 1 | 0 | 1.010244  | -5.253498 | -1.096573 |

|    |   |   |           |           |           |
|----|---|---|-----------|-----------|-----------|
| 78 | 1 | 0 | 1.153363  | -2.812639 | -0.750956 |
| 79 | 1 | 0 | -2.736125 | -2.331361 | -2.504581 |
| 80 | 1 | 0 | -2.868920 | -4.783384 | -2.880484 |
| 81 | 1 | 0 | -0.997204 | -6.262162 | -2.167289 |

-----

**TS3a/3b\_PhOH(RSR)**

SCF Done: E(RM062X) = -1896.57387316

Imaginary Frequencies = -1101.6165

-----

| Center<br>Number | Atomic<br>Number | Atomic<br>Type | Coordinates (Angstroms) |           |           |
|------------------|------------------|----------------|-------------------------|-----------|-----------|
|                  |                  |                | X                       | Y         | Z         |
| 1                | 6                | 0              | -0.238103               | -1.954151 | -1.390226 |
| 2                | 6                | 0              | -0.549476               | -1.415029 | 0.050061  |
| 3                | 1                | 0              | -1.449026               | -0.808801 | -0.089908 |
| 4                | 6                | 0              | 0.708907                | -3.074150 | -1.398256 |
| 5                | 7                | 0              | 1.480121                | -3.935573 | -1.388021 |
| 6                | 6                | 0              | -0.926283               | -2.515407 | 1.052740  |
| 7                | 6                | 0              | -1.383746               | -3.778311 | 0.655019  |
| 8                | 6                | 0              | -0.874426               | -2.253289 | 2.430252  |
| 9                | 6                | 0              | -1.776175               | -4.735324 | 1.590538  |
| 10               | 1                | 0              | -1.440138               | -4.044179 | -0.394545 |
| 11               | 6                | 0              | -1.268616               | -3.205462 | 3.366216  |
| 12               | 1                | 0              | -0.513225               | -1.298684 | 2.799353  |
| 13               | 6                | 0              | -1.723342               | -4.455152 | 2.951768  |

|    |   |   |           |           |           |
|----|---|---|-----------|-----------|-----------|
| 14 | 1 | 0 | -2.123181 | -5.704605 | 1.244456  |
| 15 | 1 | 0 | -1.214602 | -2.966427 | 4.424414  |
| 16 | 1 | 0 | -2.029326 | -5.199981 | 3.680372  |
| 17 | 6 | 0 | -1.482056 | -2.331224 | -2.219710 |
| 18 | 8 | 0 | -1.642294 | -3.464745 | -2.625398 |
| 19 | 6 | 0 | -2.470220 | -1.254111 | -2.521718 |
| 20 | 6 | 0 | -2.152930 | 0.106318  | -2.432664 |
| 21 | 6 | 0 | -3.749720 | -1.645314 | -2.934008 |
| 22 | 6 | 0 | -3.111743 | 1.063730  | -2.751700 |
| 23 | 1 | 0 | -1.154969 | 0.425404  | -2.140387 |
| 24 | 6 | 0 | -4.706598 | -0.686098 | -3.241448 |
| 25 | 1 | 0 | -3.981119 | -2.703799 | -3.002625 |
| 26 | 6 | 0 | -4.387946 | 0.669577  | -3.150079 |
| 27 | 1 | 0 | -2.857685 | 2.117903  | -2.689369 |
| 28 | 1 | 0 | -5.700588 | -0.992721 | -3.552029 |
| 29 | 1 | 0 | -5.136115 | 1.419241  | -3.390555 |
| 30 | 6 | 0 | 0.534896  | -0.439525 | 0.557689  |
| 31 | 6 | 0 | 1.782252  | -1.117094 | 1.103212  |
| 32 | 1 | 0 | 0.776878  | 0.375950  | -0.616039 |
| 33 | 1 | 0 | 1.785760  | -2.188660 | 0.881610  |
| 34 | 1 | 0 | 1.861569  | -0.993955 | 2.188154  |
| 35 | 6 | 0 | 0.046529  | 0.563221  | 1.503078  |
| 36 | 8 | 0 | 0.691792  | 1.114565  | 2.376929  |
| 37 | 8 | 0 | -1.285105 | 0.875316  | 1.310007  |
| 38 | 6 | 0 | -1.876487 | 1.837410  | 2.111680  |
| 39 | 6 | 0 | -1.371593 | 3.132860  | 2.197850  |

|    |   |   |           |           |           |
|----|---|---|-----------|-----------|-----------|
| 40 | 6 | 0 | -3.047341 | 1.474303  | 2.767633  |
| 41 | 6 | 0 | -2.061963 | 4.074578  | 2.956517  |
| 42 | 1 | 0 | -0.454501 | 3.391711  | 1.681139  |
| 43 | 6 | 0 | -3.730197 | 2.426906  | 3.521570  |
| 44 | 1 | 0 | -3.409494 | 0.454564  | 2.677734  |
| 45 | 6 | 0 | -3.239838 | 3.727654  | 3.618341  |
| 46 | 1 | 0 | -1.674490 | 5.086513  | 3.029013  |
| 47 | 1 | 0 | -4.645826 | 2.148418  | 4.034527  |
| 48 | 1 | 0 | -3.772328 | 4.469045  | 4.206044  |
| 49 | 6 | 0 | 5.581167  | -0.963447 | 0.776149  |
| 50 | 6 | 0 | 4.211814  | -1.272802 | 1.422732  |
| 51 | 1 | 0 | 5.968120  | -1.844850 | 0.257804  |
| 52 | 1 | 0 | 6.295579  | -0.678238 | 1.552442  |
| 53 | 1 | 0 | 3.997505  | -2.342876 | 1.458611  |
| 54 | 1 | 0 | 4.117327  | -0.852405 | 2.426470  |
| 55 | 6 | 0 | 4.663144  | -0.346265 | -1.330220 |
| 56 | 1 | 0 | 4.428477  | 0.514811  | -1.962795 |
| 57 | 1 | 0 | 5.249891  | -1.056512 | -1.918641 |
| 58 | 6 | 0 | 3.365483  | -1.027064 | -0.843007 |
| 59 | 1 | 0 | 2.499368  | -0.707838 | -1.422264 |
| 60 | 1 | 0 | 3.437787  | -2.116838 | -0.847143 |
| 61 | 6 | 0 | 3.278488  | 0.865188  | 0.724103  |
| 62 | 1 | 0 | 2.593857  | 1.308640  | 0.000994  |
| 63 | 1 | 0 | 2.957004  | 1.127445  | 1.731786  |
| 64 | 6 | 0 | 4.750522  | 1.238993  | 0.438120  |
| 65 | 1 | 0 | 4.782238  | 2.109393  | -0.222749 |

|    |   |   |           |           |           |
|----|---|---|-----------|-----------|-----------|
| 66 | 1 | 0 | 5.271328  | 1.491919  | 1.365817  |
| 67 | 7 | 0 | 5.461371  | 0.125848  | -0.195854 |
| 68 | 7 | 0 | 3.132246  | -0.628857 | 0.590036  |
| 69 | 6 | 0 | 0.535598  | 5.013943  | -1.847637 |
| 70 | 6 | 0 | -0.409531 | 4.231131  | -1.186809 |
| 71 | 6 | 0 | -0.268308 | 2.845690  | -1.119505 |
| 72 | 6 | 0 | 0.838184  | 2.210832  | -1.712372 |
| 73 | 6 | 0 | 1.790465  | 3.009224  | -2.372112 |
| 74 | 6 | 0 | 1.634874  | 4.389744  | -2.440854 |
| 75 | 8 | 0 | 1.000081  | 0.882155  | -1.673188 |
| 76 | 1 | 0 | 0.250343  | -1.135431 | -1.936561 |
| 77 | 1 | 0 | -1.271482 | 4.698663  | -0.716540 |
| 78 | 1 | 0 | -1.016396 | 2.240493  | -0.613042 |
| 79 | 1 | 0 | 2.644766  | 2.519355  | -2.832126 |
| 80 | 1 | 0 | 2.381766  | 4.984640  | -2.960378 |
| 81 | 1 | 0 | 0.418873  | 6.091926  | -1.900660 |

-----

**TS3a/3b\_PhOH(SRS)**

SCF Done: E(RM062X) = -1896.57229641

Imaginary Frequencies = -1115.4263

-----

| Center<br>Number | Atomic<br>Number | Atomic<br>Type | Coordinates (Angstroms) |           |           |
|------------------|------------------|----------------|-------------------------|-----------|-----------|
|                  |                  |                | X                       | Y         | Z         |
| 1                | 6                | 0              | -0.256025               | -2.047927 | -0.640889 |

-----



|    |   |   |           |           |           |
|----|---|---|-----------|-----------|-----------|
| 2  | 6 | 0 | -0.325843 | -0.492057 | -0.801798 |
| 3  | 1 | 0 | -1.080769 | -0.225120 | -0.057046 |
| 4  | 6 | 0 | 0.805464  | -2.715751 | -1.400237 |
| 5  | 7 | 0 | 1.640073  | -3.254170 | -1.992056 |
| 6  | 6 | 0 | -0.910568 | -0.087771 | -2.150712 |
| 7  | 6 | 0 | -0.289206 | -0.369415 | -3.374627 |
| 8  | 6 | 0 | -2.133412 | 0.594442  | -2.171965 |
| 9  | 6 | 0 | -0.865327 | 0.036680  | -4.576558 |
| 10 | 1 | 0 | 0.644654  | -0.922742 | -3.408946 |
| 11 | 6 | 0 | -2.712130 | 1.001570  | -3.373135 |
| 12 | 1 | 0 | -2.634097 | 0.810311  | -1.230370 |
| 13 | 6 | 0 | -2.076592 | 0.726127  | -4.581480 |
| 14 | 1 | 0 | -0.365310 | -0.192212 | -5.513278 |
| 15 | 1 | 0 | -3.660261 | 1.531808  | -3.361418 |
| 16 | 1 | 0 | -2.522759 | 1.041671  | -5.520014 |
| 17 | 6 | 0 | -1.596958 | -2.654396 | -1.105536 |
| 18 | 8 | 0 | -1.643194 | -3.329473 | -2.112400 |
| 19 | 6 | 0 | -2.836302 | -2.316755 | -0.346122 |
| 20 | 6 | 0 | -2.832654 | -1.994983 | 1.014708  |
| 21 | 6 | 0 | -4.043619 | -2.337919 | -1.056133 |
| 22 | 6 | 0 | -4.034274 | -1.701951 | 1.656836  |
| 23 | 1 | 0 | -1.904735 | -1.986612 | 1.581786  |
| 24 | 6 | 0 | -5.236350 | -2.029071 | -0.414973 |
| 25 | 1 | 0 | -4.028058 | -2.585512 | -2.113187 |
| 26 | 6 | 0 | -5.231500 | -1.713102 | 0.944459  |
| 27 | 1 | 0 | -4.030655 | -1.462626 | 2.715491  |

|    |   |   |           |           |           |
|----|---|---|-----------|-----------|-----------|
| 28 | 1 | 0 | -6.168461 | -2.034111 | -0.971423 |
| 29 | 1 | 0 | -6.163102 | -1.475227 | 1.449535  |
| 30 | 6 | 0 | 0.936527  | 0.297324  | -0.376489 |
| 31 | 6 | 0 | 2.176581  | 0.171780  | -1.248501 |
| 32 | 1 | 0 | 1.151027  | -0.243134 | 0.940286  |
| 33 | 1 | 0 | 2.129608  | -0.674871 | -1.933807 |
| 34 | 1 | 0 | 2.343487  | 1.079330  | -1.835953 |
| 35 | 6 | 0 | 0.637888  | 1.719616  | -0.170377 |
| 36 | 8 | 0 | 1.399014  | 2.656542  | -0.329860 |
| 37 | 8 | 0 | -0.642889 | 1.946577  | 0.286055  |
| 38 | 6 | 0 | -1.023123 | 3.268916  | 0.470275  |
| 39 | 6 | 0 | -1.667105 | 3.930532  | -0.569106 |
| 40 | 6 | 0 | -0.809408 | 3.883062  | 1.698993  |
| 41 | 6 | 0 | -2.115151 | 5.233955  | -0.367490 |
| 42 | 1 | 0 | -1.812068 | 3.420530  | -1.517141 |
| 43 | 6 | 0 | -1.261834 | 5.186924  | 1.890111  |
| 44 | 1 | 0 | -0.294558 | 3.342574  | 2.487941  |
| 45 | 6 | 0 | -1.914835 | 5.863708  | 0.860327  |
| 46 | 1 | 0 | -2.621982 | 5.756815  | -1.172931 |
| 47 | 1 | 0 | -1.102223 | 5.674074  | 2.847356  |
| 48 | 1 | 0 | -2.266746 | 6.879142  | 1.014381  |
| 49 | 6 | 0 | 4.619358  | 0.183890  | -1.522647 |
| 50 | 6 | 0 | 5.951327  | -0.277205 | -0.888330 |
| 51 | 1 | 0 | 4.368105  | -0.379708 | -2.423632 |
| 52 | 1 | 0 | 4.612982  | 1.251895  | -1.751624 |
| 53 | 1 | 0 | 6.259863  | -1.243036 | -1.297721 |

|    |   |   |           |           |           |
|----|---|---|-----------|-----------|-----------|
| 54 | 1 | 0 | 6.732192  | 0.455213  | -1.108454 |
| 55 | 6 | 0 | 3.643800  | -1.458890 | -0.025932 |
| 56 | 1 | 0 | 2.743352  | -1.703488 | 0.538562  |
| 57 | 1 | 0 | 3.707400  | -2.088772 | -0.915215 |
| 58 | 6 | 0 | 4.916683  | -1.542776 | 0.841680  |
| 59 | 1 | 0 | 4.657751  | -1.519344 | 1.904297  |
| 60 | 1 | 0 | 5.437204  | -2.481691 | 0.634792  |
| 61 | 6 | 0 | 5.186199  | 0.805253  | 1.082363  |
| 62 | 1 | 0 | 5.224067  | 0.792947  | 2.174696  |
| 63 | 1 | 0 | 5.765588  | 1.662731  | 0.728899  |
| 64 | 6 | 0 | 3.715877  | 0.911153  | 0.619897  |
| 65 | 1 | 0 | 3.017118  | 0.613084  | 1.403052  |
| 66 | 1 | 0 | 3.453655  | 1.903842  | 0.256175  |
| 67 | 7 | 0 | 3.509803  | -0.044972 | -0.528403 |
| 68 | 7 | 0 | 5.811906  | -0.414697 | 0.564012  |
| 69 | 6 | 0 | -1.830317 | -1.418654 | 4.525643  |
| 70 | 6 | 0 | -0.897626 | -2.435238 | 4.309709  |
| 71 | 6 | 0 | 0.170653  | -2.245136 | 3.439229  |
| 72 | 6 | 0 | 0.338206  | -1.022900 | 2.758838  |
| 73 | 6 | 0 | -0.606556 | -0.002483 | 2.983369  |
| 74 | 6 | 0 | -1.673597 | -0.205199 | 3.854326  |
| 75 | 8 | 0 | 1.373905  | -0.868101 | 1.935639  |
| 76 | 1 | 0 | -0.077879 | -2.267104 | 0.420198  |
| 77 | 1 | 0 | -1.004407 | -3.387584 | 4.823078  |
| 78 | 1 | 0 | 0.899420  | -3.032843 | 3.267365  |
| 79 | 1 | 0 | -0.491193 | 0.943286  | 2.461827  |

|    |   |   |           |           |          |
|----|---|---|-----------|-----------|----------|
| 80 | 1 | 0 | -2.392322 | 0.596089  | 4.009154 |
| 81 | 1 | 0 | -2.662554 | -1.569216 | 5.206604 |

---

**TS3a/3b\_PhOH(SSR)**

SCF Done: E(RM062X) = -1896.57663244

Imaginary Frequencies = -1237.6589

---

| Center<br>Number | Atomic<br>Number | Atomic<br>Type | Coordinates (Angstroms) |           |           |
|------------------|------------------|----------------|-------------------------|-----------|-----------|
|                  |                  |                | X                       | Y         | Z         |
| 1                | 6                | 0              | -1.339693               | 0.384722  | -0.048772 |
| 2                | 6                | 0              | -2.837773               | 0.149110  | -0.033322 |
| 3                | 1                | 0              | -0.600073               | -0.797930 | -0.287739 |
| 4                | 1                | 0              | -3.256615               | 0.309774  | 0.965604  |
| 5                | 1                | 0              | -3.355290               | 0.807890  | -0.736685 |
| 6                | 6                | 0              | -0.961592               | 1.253267  | -1.156769 |
| 7                | 8                | 0              | -1.501829               | 1.317801  | -2.245356 |
| 8                | 8                | 0              | 0.178196                | 1.984731  | -0.883078 |
| 9                | 6                | 0              | 0.771512                | 2.729808  | -1.888204 |
| 10               | 6                | 0              | 0.087902                | 3.752572  | -2.539949 |
| 11               | 6                | 0              | 2.109092                | 2.464069  | -2.162150 |
| 12               | 6                | 0              | 0.763586                | 4.510146  | -3.493160 |
| 13               | 1                | 0              | -0.952217               | 3.946418  | -2.301680 |
| 14               | 6                | 0              | 2.775391                | 3.232505  | -3.114508 |
| 15               | 1                | 0              | 2.609254                | 1.659243  | -1.629881 |

|    |   |   |           |           |           |
|----|---|---|-----------|-----------|-----------|
| 16 | 6 | 0 | 2.103568  | 4.253439  | -3.784356 |
| 17 | 1 | 0 | 0.238765  | 5.309065  | -4.008345 |
| 18 | 1 | 0 | 3.819768  | 3.029569  | -3.331660 |
| 19 | 1 | 0 | 2.622176  | 4.849693  | -4.528739 |
| 20 | 6 | 0 | -4.817857 | -1.238996 | -0.485947 |
| 21 | 6 | 0 | -5.301366 | -2.698432 | -0.643456 |
| 22 | 1 | 0 | -5.185573 | -0.772901 | 0.430266  |
| 23 | 1 | 0 | -5.082989 | -0.614478 | -1.341756 |
| 24 | 1 | 0 | -5.703017 | -3.075345 | 0.300816  |
| 25 | 1 | 0 | -6.092871 | -2.742500 | -1.395809 |
| 26 | 6 | 0 | -2.910933 | -2.262587 | 0.619216  |
| 27 | 1 | 0 | -1.846541 | -2.147100 | 0.819133  |
| 28 | 1 | 0 | -3.486047 | -2.022321 | 1.516978  |
| 29 | 6 | 0 | -3.241668 | -3.662658 | 0.058641  |
| 30 | 1 | 0 | -2.332925 | -4.147133 | -0.310824 |
| 31 | 1 | 0 | -3.666619 | -4.284218 | 0.851074  |
| 32 | 6 | 0 | -3.518021 | -2.946056 | -2.195437 |
| 33 | 1 | 0 | -2.794282 | -3.651517 | -2.610975 |
| 34 | 1 | 0 | -4.269159 | -2.732583 | -2.960744 |
| 35 | 6 | 0 | -2.788621 | -1.652189 | -1.766264 |
| 36 | 1 | 0 | -1.715770 | -1.805629 | -1.652030 |
| 37 | 1 | 0 | -2.965881 | -0.813458 | -2.441336 |
| 38 | 7 | 0 | -3.313226 | -1.243622 | -0.414175 |
| 39 | 7 | 0 | -4.194646 | -3.567139 | -1.052152 |
| 40 | 6 | 0 | 0.793358  | 0.514011  | 1.359487  |
| 41 | 6 | 0 | -0.766029 | 0.671484  | 1.344591  |

|    |   |   |           |           |          |
|----|---|---|-----------|-----------|----------|
| 42 | 1 | 0 | -1.116968 | -0.151178 | 1.978469 |
| 43 | 6 | 0 | 1.514394  | 1.739291  | 1.716915 |
| 44 | 7 | 0 | 2.117148  | 2.686669  | 1.994949 |
| 45 | 6 | 0 | -1.243096 | 1.942468  | 2.040822 |
| 46 | 6 | 0 | -1.899591 | 2.979768  | 1.377151 |
| 47 | 6 | 0 | -1.019720 | 2.067555  | 3.418716 |
| 48 | 6 | 0 | -2.316521 | 4.117538  | 2.070504 |
| 49 | 1 | 0 | -2.103623 | 2.908695  | 0.312071 |
| 50 | 6 | 0 | -1.429455 | 3.200938  | 4.112325 |
| 51 | 1 | 0 | -0.515971 | 1.258733  | 3.945615 |
| 52 | 6 | 0 | -2.080534 | 4.234231  | 3.436933 |
| 53 | 1 | 0 | -2.827536 | 4.913470  | 1.536573 |
| 54 | 1 | 0 | -1.245116 | 3.277198  | 5.180116 |
| 55 | 1 | 0 | -2.403614 | 5.120511  | 3.975061 |
| 56 | 6 | 0 | 1.268549  | -0.634075 | 2.280617 |
| 57 | 8 | 0 | 0.562128  | -1.035406 | 3.180974 |
| 58 | 6 | 0 | 2.606366  | -1.237366 | 2.008718 |
| 59 | 6 | 0 | 3.513133  | -0.699871 | 1.086424 |
| 60 | 6 | 0 | 2.932787  | -2.413723 | 2.693189 |
| 61 | 6 | 0 | 4.730350  | -1.335058 | 0.856874 |
| 62 | 1 | 0 | 3.290878  | 0.214396  | 0.543952 |
| 63 | 6 | 0 | 4.141981  | -3.053867 | 2.451127 |
| 64 | 1 | 0 | 2.220874  | -2.821178 | 3.404024 |
| 65 | 6 | 0 | 5.041992  | -2.514516 | 1.531223 |
| 66 | 1 | 0 | 5.429696  | -0.914146 | 0.141208 |
| 67 | 1 | 0 | 4.384361  | -3.971653 | 2.977920 |

|    |   |   |          |           |           |
|----|---|---|----------|-----------|-----------|
| 68 | 1 | 0 | 5.987292 | -3.014181 | 1.340421  |
| 69 | 6 | 0 | 3.454323 | -2.469289 | -2.434059 |
| 70 | 6 | 0 | 3.046191 | -3.392243 | -1.465698 |
| 71 | 6 | 0 | 1.890574 | -3.181807 | -0.726313 |
| 72 | 6 | 0 | 1.097465 | -2.032790 | -0.929655 |
| 73 | 6 | 0 | 1.497485 | -1.124743 | -1.930720 |
| 74 | 6 | 0 | 2.667297 | -1.342470 | -2.659769 |
| 75 | 8 | 0 | 0.021450 | -1.851349 | -0.171755 |
| 76 | 1 | 0 | 1.138840 | 0.267420  | 0.352127  |
| 77 | 1 | 0 | 3.642715 | -4.281979 | -1.277865 |
| 78 | 1 | 0 | 1.577217 | -3.888090 | 0.038027  |
| 79 | 1 | 0 | 0.882354 | -0.253868 | -2.147529 |
| 80 | 1 | 0 | 2.957400 | -0.618612 | -3.418235 |
| 81 | 1 | 0 | 4.363676 | -2.632756 | -3.004032 |

-----

**3b\_PhOH(RRS)**

SCF Done: E(RM062X) = -1896.59059953

-----

| Center<br>Number | Atomic<br>Number | Atomic<br>Type | Coordinates (Angstroms) |           |           |
|------------------|------------------|----------------|-------------------------|-----------|-----------|
|                  |                  |                | X                       | Y         | Z         |
| 1                | 6                | 0              | -0.794125               | -0.325738 | 0.211967  |
| 2                | 6                | 0              | 0.481323                | -0.697938 | -0.537686 |
| 3                | 1                | 0              | -0.837760               | -0.780783 | 1.205213  |
| 4                | 1                | 0              | 1.298692                | -0.040448 | -0.231410 |

|    |   |   |           |           |           |
|----|---|---|-----------|-----------|-----------|
| 5  | 1 | 0 | 0.323201  | -0.595004 | -1.615185 |
| 6  | 6 | 0 | -2.025308 | -0.731957 | -0.570035 |
| 7  | 8 | 0 | -2.197655 | -0.509722 | -1.741855 |
| 8  | 8 | 0 | -2.935133 | -1.339425 | 0.223476  |
| 9  | 6 | 0 | -4.188870 | -1.601707 | -0.334180 |
| 10 | 6 | 0 | -4.407487 | -2.800934 | -0.996649 |
| 11 | 6 | 0 | -5.191723 | -0.658795 | -0.156180 |
| 12 | 6 | 0 | -5.683148 | -3.063544 | -1.492456 |
| 13 | 1 | 0 | -3.594649 | -3.511496 | -1.114301 |
| 14 | 6 | 0 | -6.462191 | -0.934220 | -0.656422 |
| 15 | 1 | 0 | -4.969582 | 0.264470  | 0.372665  |
| 16 | 6 | 0 | -6.708661 | -2.133519 | -1.323764 |
| 17 | 1 | 0 | -5.873959 | -3.997928 | -2.011375 |
| 18 | 1 | 0 | -7.258657 | -0.208566 | -0.522994 |
| 19 | 1 | 0 | -7.700671 | -2.344376 | -1.711201 |
| 20 | 6 | 0 | 0.610269  | -4.530321 | -0.562189 |
| 21 | 6 | 0 | -0.056227 | -3.132351 | -0.626179 |
| 22 | 1 | 0 | 0.686607  | -4.958300 | -1.564585 |
| 23 | 1 | 0 | 0.002379  | -5.195794 | 0.054815  |
| 24 | 1 | 0 | -0.451173 | -2.900050 | -1.618496 |
| 25 | 1 | 0 | -0.846006 | -3.023562 | 0.121008  |
| 26 | 6 | 0 | 2.807862  | -3.678604 | -0.901879 |
| 27 | 1 | 0 | 3.783310  | -3.542940 | -0.427163 |
| 28 | 1 | 0 | 2.947429  | -4.243009 | -1.827143 |
| 29 | 6 | 0 | 2.174430  | -2.306410 | -1.219821 |
| 30 | 1 | 0 | 2.862155  | -1.475909 | -1.038955 |



|    |   |   |           |           |           |
|----|---|---|-----------|-----------|-----------|
| 31 | 1 | 0 | 1.787555  | -2.244540 | -2.239201 |
| 32 | 6 | 0 | 1.447506  | -2.283452 | 1.118452  |
| 33 | 1 | 0 | 2.250581  | -1.560083 | 1.282856  |
| 34 | 1 | 0 | 0.612949  | -2.036720 | 1.775046  |
| 35 | 6 | 0 | 1.892840  | -3.754798 | 1.293259  |
| 36 | 1 | 0 | 2.879980  | -3.785557 | 1.762538  |
| 37 | 1 | 0 | 1.188691  | -4.289661 | 1.935644  |
| 38 | 7 | 0 | 1.956036  | -4.446722 | 0.005633  |
| 39 | 7 | 0 | 0.987514  | -2.094664 | -0.306886 |
| 40 | 6 | 0 | 0.350521  | 1.696285  | 1.211458  |
| 41 | 6 | 0 | -0.835955 | 1.232470  | 0.386060  |
| 42 | 1 | 0 | -0.722522 | 1.650192  | -0.619489 |
| 43 | 6 | 0 | 0.538863  | 1.081431  | 2.472361  |
| 44 | 7 | 0 | 0.643993  | 0.555446  | 3.508743  |
| 45 | 6 | 0 | -2.193827 | 1.680161  | 0.908968  |
| 46 | 6 | 0 | -2.667619 | 1.272798  | 2.162599  |
| 47 | 6 | 0 | -3.001894 | 2.508784  | 0.124998  |
| 48 | 6 | 0 | -3.904791 | 1.709179  | 2.628835  |
| 49 | 1 | 0 | -2.065288 | 0.612889  | 2.781932  |
| 50 | 6 | 0 | -4.240903 | 2.950073  | 0.590981  |
| 51 | 1 | 0 | -2.651015 | 2.818621  | -0.857234 |
| 52 | 6 | 0 | -4.693586 | 2.555048  | 1.847365  |
| 53 | 1 | 0 | -4.255296 | 1.386385  | 3.604963  |
| 54 | 1 | 0 | -4.850700 | 3.599637  | -0.030305 |
| 55 | 1 | 0 | -5.656506 | 2.897628  | 2.214605  |
| 56 | 6 | 0 | 1.398467  | 2.493964  | 0.733362  |

|    |   |   |           |           |           |
|----|---|---|-----------|-----------|-----------|
| 57 | 8 | 0 | 2.522025  | 2.626040  | 1.311745  |
| 58 | 6 | 0 | 1.209027  | 3.256373  | -0.550209 |
| 59 | 6 | 0 | 2.174349  | 3.145681  | -1.555183 |
| 60 | 6 | 0 | 0.116070  | 4.105862  | -0.743548 |
| 61 | 6 | 0 | 2.038075  | 3.855423  | -2.744985 |
| 62 | 1 | 0 | 3.024551  | 2.485840  | -1.404465 |
| 63 | 6 | 0 | -0.011657 | 4.831843  | -1.926544 |
| 64 | 1 | 0 | -0.631057 | 4.202066  | 0.040796  |
| 65 | 6 | 0 | 0.946711  | 4.703511  | -2.931143 |
| 66 | 1 | 0 | 2.785466  | 3.750028  | -3.526071 |
| 67 | 1 | 0 | -0.858409 | 5.498529  | -2.062869 |
| 68 | 1 | 0 | 0.844329  | 5.263319  | -3.856269 |
| 69 | 6 | 0 | 6.364683  | -0.673019 | -0.978310 |
| 70 | 6 | 0 | 5.865227  | 0.626769  | -0.902925 |
| 71 | 6 | 0 | 4.920973  | 0.976053  | 0.059912  |
| 72 | 6 | 0 | 4.453615  | 0.009914  | 0.962716  |
| 73 | 6 | 0 | 4.962220  | -1.294979 | 0.896436  |
| 74 | 6 | 0 | 5.909931  | -1.627347 | -0.067309 |
| 75 | 8 | 0 | 3.530621  | 0.282047  | 1.906512  |
| 76 | 1 | 0 | 3.149305  | 1.204103  | 1.775710  |
| 77 | 1 | 0 | 6.217388  | 1.384735  | -1.597724 |
| 78 | 1 | 0 | 4.536987  | 1.989362  | 0.132533  |
| 79 | 1 | 0 | 4.604067  | -2.034584 | 1.608717  |
| 80 | 1 | 0 | 6.294829  | -2.643111 | -0.106203 |
| 81 | 1 | 0 | 7.101201  | -0.937248 | -1.730661 |

---

**3b\_PhOH(RSR)**

SCF Done: E(RM062X) = -1896.58329907

| Center<br>Number | Atomic<br>Number | Atomic<br>Type | Coordinates (Angstroms) |           |           |
|------------------|------------------|----------------|-------------------------|-----------|-----------|
|                  |                  |                | X                       | Y         | Z         |
| 1                | 6                | 0              | 0.993982                | -1.582001 | 1.585394  |
| 2                | 6                | 0              | 1.505165                | -1.135500 | 0.226858  |
| 3                | 1                | 0              | 2.079078                | -0.223735 | 0.414553  |
| 4                | 6                | 0              | 0.404587                | -2.881450 | 1.693008  |
| 5                | 7                | 0              | -0.067767               | -3.941134 | 1.739449  |
| 6                | 6                | 0              | 2.470602                | -2.142467 | -0.398050 |
| 7                | 6                | 0              | 3.274177                | -2.948518 | 0.417826  |
| 8                | 6                | 0              | 2.638466                | -2.232573 | -1.784324 |
| 9                | 6                | 0              | 4.207301                | -3.822969 | -0.133128 |
| 10               | 1                | 0              | 3.176527                | -2.887647 | 1.498373  |
| 11               | 6                | 0              | 3.572146                | -3.107307 | -2.338080 |
| 12               | 1                | 0              | 2.046546                | -1.619675 | -2.457989 |
| 13               | 6                | 0              | 4.358706                | -3.908961 | -1.515366 |
| 14               | 1                | 0              | 4.817069                | -4.438347 | 0.521854  |
| 15               | 1                | 0              | 3.680123                | -3.159355 | -3.417455 |
| 16               | 1                | 0              | 5.082946                | -4.593709 | -1.946106 |
| 17               | 6                | 0              | 1.113531                | -0.869007 | 2.736301  |
| 18               | 8                | 0              | 0.705602                | -1.452895 | 3.880786  |
| 19               | 6                | 0              | 1.723509                | 0.475405  | 2.867362  |

|    |   |   |           |           |           |
|----|---|---|-----------|-----------|-----------|
| 20 | 6 | 0 | 2.693943  | 0.664519  | 3.862062  |
| 21 | 6 | 0 | 1.330343  | 1.547961  | 2.057887  |
| 22 | 6 | 0 | 3.289971  | 1.910397  | 4.024696  |
| 23 | 1 | 0 | 2.999982  | -0.168769 | 4.489940  |
| 24 | 6 | 0 | 1.930778  | 2.793106  | 2.234310  |
| 25 | 1 | 0 | 0.533305  | 1.433939  | 1.321342  |
| 26 | 6 | 0 | 2.910688  | 2.975703  | 3.208437  |
| 27 | 1 | 0 | 4.051476  | 2.047772  | 4.785887  |
| 28 | 1 | 0 | 1.621461  | 3.626320  | 1.609737  |
| 29 | 1 | 0 | 3.375358  | 3.948811  | 3.336825  |
| 30 | 6 | 0 | 0.326950  | -0.709149 | -0.693565 |
| 31 | 6 | 0 | -0.457591 | -1.873886 | -1.304547 |
| 32 | 1 | 0 | -0.329396 | -0.092101 | -0.059555 |
| 33 | 1 | 0 | -0.234490 | -2.812908 | -0.792762 |
| 34 | 1 | 0 | -0.229994 | -1.998615 | -2.365890 |
| 35 | 6 | 0 | 0.718719  | 0.319422  | -1.736558 |
| 36 | 8 | 0 | 0.342799  | 0.345386  | -2.882743 |
| 37 | 8 | 0 | 1.510745  | 1.269964  | -1.195250 |
| 38 | 6 | 0 | 1.644096  | 2.467378  | -1.900770 |
| 39 | 6 | 0 | 0.605039  | 3.387720  | -1.826897 |
| 40 | 6 | 0 | 2.818080  | 2.720445  | -2.593785 |
| 41 | 6 | 0 | 0.758287  | 4.609173  | -2.478133 |
| 42 | 1 | 0 | -0.283939 | 3.119834  | -1.256910 |
| 43 | 6 | 0 | 2.956083  | 3.949809  | -3.238202 |
| 44 | 1 | 0 | 3.602160  | 1.970021  | -2.623370 |
| 45 | 6 | 0 | 1.930096  | 4.891389  | -3.181934 |

|    |   |   |           |           |           |
|----|---|---|-----------|-----------|-----------|
| 46 | 1 | 0 | -0.038899 | 5.345420  | -2.432071 |
| 47 | 1 | 0 | 3.868185  | 4.168691  | -3.785008 |
| 48 | 1 | 0 | 2.044236  | 5.847025  | -3.684480 |
| 49 | 6 | 0 | -4.100527 | -2.899818 | -1.672115 |
| 50 | 6 | 0 | -2.575895 | -2.922073 | -1.925902 |
| 51 | 1 | 0 | -4.376729 | -3.662789 | -0.939360 |
| 52 | 1 | 0 | -4.628199 | -3.110660 | -2.605559 |
| 53 | 1 | 0 | -2.098564 | -3.815646 | -1.519180 |
| 54 | 1 | 0 | -2.322727 | -2.823109 | -2.983826 |
| 55 | 6 | 0 | -3.964649 | -1.410311 | 0.181406  |
| 56 | 1 | 0 | -4.137107 | -0.373418 | 0.486391  |
| 57 | 1 | 0 | -4.477167 | -2.071182 | 0.885357  |
| 58 | 6 | 0 | -2.453244 | -1.725657 | 0.191958  |
| 59 | 1 | 0 | -1.890537 | -0.976623 | 0.751978  |
| 60 | 1 | 0 | -2.232266 | -2.718777 | 0.590275  |
| 61 | 6 | 0 | -2.441996 | -0.485252 | -1.940503 |
| 62 | 1 | 0 | -2.085655 | 0.370786  | -1.357533 |
| 63 | 1 | 0 | -1.964651 | -0.482075 | -2.920834 |
| 64 | 6 | 0 | -3.985527 | -0.550755 | -2.033555 |
| 65 | 1 | 0 | -4.407304 | 0.413331  | -1.737776 |
| 66 | 1 | 0 | -4.298768 | -0.767638 | -3.058617 |
| 67 | 7 | 0 | -4.523963 | -1.595170 | -1.159573 |
| 68 | 7 | 0 | -1.958852 | -1.730825 | -1.233049 |
| 69 | 6 | 0 | -4.815583 | 1.870666  | 2.297404  |
| 70 | 6 | 0 | -4.712197 | 2.420483  | 1.015919  |
| 71 | 6 | 0 | -3.518454 | 2.368399  | 0.305270  |

|    |   |   |           |           |           |
|----|---|---|-----------|-----------|-----------|
| 72 | 6 | 0 | -2.347321 | 1.749645  | 0.838146  |
| 73 | 6 | 0 | -2.479749 | 1.215254  | 2.156292  |
| 74 | 6 | 0 | -3.680659 | 1.273041  | 2.854145  |
| 75 | 8 | 0 | -1.251143 | 1.658832  | 0.158484  |
| 76 | 1 | 0 | 0.718643  | -0.800374 | 4.604288  |
| 77 | 1 | 0 | -5.579391 | 2.897412  | 0.562498  |
| 78 | 1 | 0 | -3.450337 | 2.799539  | -0.692236 |
| 79 | 1 | 0 | -1.605987 | 0.741150  | 2.603553  |
| 80 | 1 | 0 | -3.735565 | 0.842106  | 3.852339  |
| 81 | 1 | 0 | -5.750482 | 1.911048  | 2.847736  |

-----

### 3b\_PhOH(SRS)

SCF Done: E(RM062X) = -1896.57412314

-----

| Center<br>Number | Atomic<br>Number | Atomic<br>Type | Coordinates (Angstroms) |           |           |
|------------------|------------------|----------------|-------------------------|-----------|-----------|
|                  |                  |                | X                       | Y         | Z         |
| 1                | 6                | 0              | -0.993051               | -1.581673 | 1.585989  |
| 2                | 6                | 0              | -1.504600               | -1.135974 | 0.227340  |
| 3                | 1                | 0              | -2.078949               | -0.224417 | 0.414715  |
| 4                | 6                | 0              | -0.403036               | -2.880805 | 1.694064  |
| 5                | 7                | 0              | 0.069832                | -3.940240 | 1.740960  |
| 6                | 6                | 0              | -2.469569               | -2.143707 | -0.397096 |
| 7                | 6                | 0              | -3.272033               | -2.950536 | 0.419092  |
| 8                | 6                | 0              | -2.638029               | -2.233840 | -1.783303 |

|    |   |   |           |           |           |
|----|---|---|-----------|-----------|-----------|
| 9  | 6 | 0 | -4.204648 | -3.825782 | -0.131488 |
| 10 | 1 | 0 | -3.173949 | -2.889679 | 1.499596  |
| 11 | 6 | 0 | -3.571199 | -3.109356 | -2.336678 |
| 12 | 1 | 0 | -2.046922 | -1.620420 | -2.457212 |
| 13 | 6 | 0 | -4.356641 | -3.911795 | -1.513653 |
| 14 | 1 | 0 | -4.813570 | -4.441736 | 0.523740  |
| 15 | 1 | 0 | -3.679655 | -3.161409 | -3.416005 |
| 16 | 1 | 0 | -5.080485 | -4.597139 | -1.944104 |
| 17 | 6 | 0 | -1.112789 | -0.868318 | 2.736657  |
| 18 | 8 | 0 | -0.704603 | -1.451708 | 3.881297  |
| 19 | 6 | 0 | -1.723128 | 0.475964  | 2.867314  |
| 20 | 6 | 0 | -1.330390 | 1.548312  | 2.057350  |
| 21 | 6 | 0 | -2.693336 | 0.665249  | 3.862201  |
| 22 | 6 | 0 | -1.931020 | 2.793400  | 2.233488  |
| 23 | 1 | 0 | -0.533543 | 1.434180  | 1.320619  |
| 24 | 6 | 0 | -3.289577 | 1.911064  | 4.024540  |
| 25 | 1 | 0 | -2.999076 | -0.167870 | 4.490447  |
| 26 | 6 | 0 | -2.910706 | 2.976154  | 3.207812  |
| 27 | 1 | 0 | -1.622010 | 3.626464  | 1.608564  |
| 28 | 1 | 0 | -4.050919 | 2.048561  | 4.785872  |
| 29 | 1 | 0 | -3.375515 | 3.949225  | 3.335985  |
| 30 | 6 | 0 | -0.326711 | -0.709444 | -0.693418 |
| 31 | 6 | 0 | 0.458101  | -1.874086 | -1.304227 |
| 32 | 1 | 0 | 0.329592  | -0.091996 | -0.059759 |
| 33 | 1 | 0 | 0.235335  | -2.813056 | -0.792205 |
| 34 | 1 | 0 | 0.230395  | -1.999128 | -2.365509 |

|    |   |   |           |           |           |
|----|---|---|-----------|-----------|-----------|
| 35 | 6 | 0 | -0.719045 | 0.318678  | -1.736660 |
| 36 | 8 | 0 | -0.343211 | 0.344504  | -2.882876 |
| 37 | 8 | 0 | -1.511523 | 1.268967  | -1.195581 |
| 38 | 6 | 0 | -1.645564 | 2.466110  | -1.901425 |
| 39 | 6 | 0 | -2.820060 | 2.718726  | -2.593720 |
| 40 | 6 | 0 | -0.606643 | 3.386693  | -1.828526 |
| 41 | 6 | 0 | -2.958741 | 3.947879  | -3.238414 |
| 42 | 1 | 0 | -3.604040 | 1.968163  | -2.622508 |
| 43 | 6 | 0 | -0.760561 | 4.607901  | -2.480043 |
| 44 | 1 | 0 | 0.282731  | 3.119196  | -1.258973 |
| 45 | 6 | 0 | -1.932898 | 4.889665  | -3.183155 |
| 46 | 1 | 0 | -3.871270 | 4.166399  | -3.784658 |
| 47 | 1 | 0 | 0.036511  | 5.344322  | -2.434744 |
| 48 | 1 | 0 | -2.047561 | 5.845129  | -3.685909 |
| 49 | 6 | 0 | 2.576661  | -2.921748 | -1.925612 |
| 50 | 6 | 0 | 4.101301  | -2.899026 | -1.671953 |
| 51 | 1 | 0 | 2.099611  | -3.815381 | -1.518694 |
| 52 | 1 | 0 | 2.323372  | -2.823036 | -2.983530 |
| 53 | 1 | 0 | 4.377793  | -3.661818 | -0.939122 |
| 54 | 1 | 0 | 4.628957  | -3.109838 | -2.605412 |
| 55 | 6 | 0 | 2.453833  | -1.725073 | 0.192061  |
| 56 | 1 | 0 | 1.890934  | -0.976192 | 0.752111  |
| 57 | 1 | 0 | 2.233234  | -2.718225 | 0.590495  |
| 58 | 6 | 0 | 3.965134  | -1.409276 | 0.181366  |
| 59 | 1 | 0 | 4.137290  | -0.372273 | 0.486142  |
| 60 | 1 | 0 | 4.477895  | -2.069862 | 0.885407  |



|    |   |   |           |           |           |
|----|---|---|-----------|-----------|-----------|
| 61 | 6 | 0 | 3.985637  | -0.550031 | -2.033701 |
| 62 | 1 | 0 | 4.407131  | 0.414209  | -1.738025 |
| 63 | 1 | 0 | 4.298908  | -0.766929 | -3.058750 |
| 64 | 6 | 0 | 2.442085  | -0.484978 | -1.940600 |
| 65 | 1 | 0 | 2.085502  | 0.371088  | -1.357817 |
| 66 | 1 | 0 | 1.964718  | -0.482141 | -2.920920 |
| 67 | 7 | 0 | 1.959333  | -1.730560 | -1.232906 |
| 68 | 7 | 0 | 4.524417  | -1.594184 | -1.159618 |
| 69 | 6 | 0 | 4.814082  | 1.873258  | 2.297358  |
| 70 | 6 | 0 | 4.711135  | 2.422441  | 1.015573  |
| 71 | 6 | 0 | 3.517730  | 2.369713  | 0.304384  |
| 72 | 6 | 0 | 2.346510  | 1.750948  | 0.837046  |
| 73 | 6 | 0 | 2.478515  | 1.217111  | 2.155461  |
| 74 | 6 | 0 | 3.679079  | 1.275547  | 2.853852  |
| 75 | 8 | 0 | 1.250587  | 1.659641  | 0.157038  |
| 76 | 1 | 0 | -0.717830 | -0.798985 | 4.604615  |
| 77 | 1 | 0 | 5.578414  | 2.899380  | 0.562323  |
| 78 | 1 | 0 | 3.449951  | 2.800409  | -0.693336 |
| 79 | 1 | 0 | 1.604620  | 0.743035  | 2.602491  |
| 80 | 1 | 0 | 3.733647  | 0.845080  | 3.852266  |
| 81 | 1 | 0 | 5.748721  | 1.914154  | 2.848092  |

---

**3b\_PhOH(SSR)**

SCF Done: E(RM062X) = -1896.58887152

---

| Center<br>Number | Atomic<br>Number | Atomic<br>Type | Coordinates (Angstroms) |           |           |
|------------------|------------------|----------------|-------------------------|-----------|-----------|
|                  |                  |                | X                       | Y         | Z         |
| 1                | 6                | 0              | 0.671548                | -0.029183 | 0.695914  |
| 2                | 6                | 0              | 0.326534                | -0.625224 | 2.061547  |
| 3                | 1                | 0              | -0.107417               | -0.261666 | -0.038194 |
| 4                | 1                | 0              | 0.784130                | -1.613266 | 2.161669  |
| 5                | 1                | 0              | 0.686440                | 0.009381  | 2.875341  |
| 6                | 6                | 0              | 0.645719                | 1.487303  | 0.714391  |
| 7                | 8                | 0              | 0.483525                | 2.185396  | 1.686657  |
| 8                | 8                | 0              | 0.772694                | 1.972876  | -0.533088 |
| 9                | 6                | 0              | 0.484630                | 3.322741  | -0.731507 |
| 10               | 6                | 0              | 1.478805                | 4.277618  | -0.573648 |
| 11               | 6                | 0              | -0.803637               | 3.643445  | -1.138489 |
| 12               | 6                | 0              | 1.163525                | 5.609519  | -0.838576 |
| 13               | 1                | 0              | 2.472264                | 3.974384  | -0.257522 |
| 14               | 6                | 0              | -1.102601               | 4.978788  | -1.399503 |
| 15               | 1                | 0              | -1.524784               | 2.835094  | -1.240647 |
| 16               | 6                | 0              | -0.121973               | 5.960282  | -1.250276 |
| 17               | 1                | 0              | 1.926197                | 6.373588  | -0.722805 |
| 18               | 1                | 0              | -2.103105               | 5.253333  | -1.720433 |
| 19               | 1                | 0              | -0.359249               | 6.999477  | -1.456774 |
| 20               | 6                | 0              | -1.262804               | -1.404323 | 3.728465  |
| 21               | 6                | 0              | -2.726547               | -1.831934 | 3.970945  |
| 22               | 1                | 0              | -0.566219               | -2.241011 | 3.804041  |
| 23               | 1                | 0              | -0.941054               | -0.604712 | 4.399350  |

|    |   |   |           |           |           |
|----|---|---|-----------|-----------|-----------|
| 24 | 1 | 0 | -2.811897 | -2.921627 | 3.971581  |
| 25 | 1 | 0 | -3.061036 | -1.458818 | 4.942165  |
| 26 | 6 | 0 | -1.740093 | -1.844837 | 1.365241  |
| 27 | 1 | 0 | -1.561040 | -1.475827 | 0.353660  |
| 28 | 1 | 0 | -1.208520 | -2.785855 | 1.528147  |
| 29 | 6 | 0 | -3.257809 | -1.947567 | 1.656017  |
| 30 | 1 | 0 | -3.824895 | -1.457449 | 0.859409  |
| 31 | 1 | 0 | -3.552038 | -2.999453 | 1.695434  |
| 32 | 6 | 0 | -3.364281 | 0.137046  | 2.797540  |
| 33 | 1 | 0 | -4.104777 | 0.559472  | 2.113888  |
| 34 | 1 | 0 | -3.498773 | 0.592528  | 3.782347  |
| 35 | 6 | 0 | -1.943354 | 0.430242  | 2.255894  |
| 36 | 1 | 0 | -1.945674 | 0.729490  | 1.201846  |
| 37 | 1 | 0 | -1.411976 | 1.170694  | 2.854592  |
| 38 | 7 | 0 | -1.141057 | -0.848567 | 2.328551  |
| 39 | 7 | 0 | -3.599407 | -1.302710 | 2.923803  |
| 40 | 6 | 0 | 2.442687  | -0.229555 | -1.202882 |
| 41 | 6 | 0 | 1.974177  | -0.699273 | 0.166622  |
| 42 | 1 | 0 | 1.687937  | -1.748515 | 0.038877  |
| 43 | 6 | 0 | 3.267459  | 0.938440  | -1.263066 |
| 44 | 7 | 0 | 3.943816  | 1.880958  | -1.271791 |
| 45 | 6 | 0 | 3.143445  | -0.688672 | 1.144256  |
| 46 | 6 | 0 | 3.449182  | 0.408009  | 1.954819  |
| 47 | 6 | 0 | 3.977705  | -1.810633 | 1.186740  |
| 48 | 6 | 0 | 4.561758  | 0.377072  | 2.795889  |
| 49 | 1 | 0 | 2.822682  | 1.295811  | 1.944797  |

|    |   |   |           |           |           |
|----|---|---|-----------|-----------|-----------|
| 50 | 6 | 0 | 5.088940  | -1.843055 | 2.023744  |
| 51 | 1 | 0 | 3.748160  | -2.664394 | 0.552409  |
| 52 | 6 | 0 | 5.384420  | -0.745793 | 2.832195  |
| 53 | 1 | 0 | 4.784845  | 1.236686  | 3.420934  |
| 54 | 1 | 0 | 5.722774  | -2.724614 | 2.045392  |
| 55 | 1 | 0 | 6.250346  | -0.766982 | 3.487015  |
| 56 | 6 | 0 | 2.251166  | -0.918445 | -2.354354 |
| 57 | 8 | 0 | 2.890755  | -0.502319 | -3.466453 |
| 58 | 6 | 0 | 1.440306  | -2.153371 | -2.474762 |
| 59 | 6 | 0 | 2.049479  | -3.303058 | -2.993216 |
| 60 | 6 | 0 | 0.090796  | -2.180590 | -2.102737 |
| 61 | 6 | 0 | 1.323734  | -4.484950 | -3.103001 |
| 62 | 1 | 0 | 3.095714  | -3.276117 | -3.287264 |
| 63 | 6 | 0 | -0.625958 | -3.370478 | -2.213487 |
| 64 | 1 | 0 | -0.409710 | -1.269436 | -1.770253 |
| 65 | 6 | 0 | -0.012112 | -4.521339 | -2.705796 |
| 66 | 1 | 0 | 1.802321  | -5.377653 | -3.493610 |
| 67 | 1 | 0 | -1.672350 | -3.394890 | -1.921994 |
| 68 | 1 | 0 | -0.576601 | -5.445459 | -2.786777 |
| 69 | 6 | 0 | -5.863261 | -0.184991 | -1.563610 |
| 70 | 6 | 0 | -5.413841 | 0.899360  | -0.803630 |
| 71 | 6 | 0 | -4.056953 | 1.135407  | -0.614969 |
| 72 | 6 | 0 | -3.052742 | 0.280482  | -1.170078 |
| 73 | 6 | 0 | -3.546326 | -0.802761 | -1.961464 |
| 74 | 6 | 0 | -4.906715 | -1.024510 | -2.142618 |
| 75 | 8 | 0 | -1.794823 | 0.472585  | -0.961025 |

|    |   |   |           |           |           |
|----|---|---|-----------|-----------|-----------|
| 76 | 1 | 0 | 2.559239  | -0.997006 | -4.237836 |
| 77 | 1 | 0 | -6.137063 | 1.576796  | -0.352471 |
| 78 | 1 | 0 | -3.727147 | 1.987210  | -0.021295 |
| 79 | 1 | 0 | -2.815947 | -1.458419 | -2.431949 |
| 80 | 1 | 0 | -5.228381 | -1.869129 | -2.749668 |
| 81 | 1 | 0 | -6.924109 | -0.364976 | -1.707349 |

-----

**TS3b/P\_PhOH(RRS)**

SCF Done: E(RM062X) = -1896.57188526

Imaginary Frequencies = -118.0270

-----

| Center<br>Number | Atomic<br>Number | Atomic<br>Type | Coordinates (Angstroms) |           |           |
|------------------|------------------|----------------|-------------------------|-----------|-----------|
|                  |                  |                | X                       | Y         | Z         |
| 1                | 6                | 0              | -0.421516               | -1.026591 | 0.872702  |
| 2                | 6                | 0              | 0.540704                | -1.965295 | 1.084504  |
| 3                | 1                | 0              | 2.789090                | -0.033384 | 0.735716  |
| 4                | 1                | 0              | 0.264687                | -2.993196 | 1.303779  |
| 5                | 1                | 0              | 1.559393                | -1.680704 | 1.324780  |
| 6                | 6                | 0              | 0.044695                | 0.347535  | 0.762779  |
| 7                | 8                | 0              | 1.209173                | 0.722657  | 0.747599  |
| 8                | 8                | 0              | -0.971532               | 1.249091  | 0.689009  |
| 9                | 6                | 0              | -0.718764               | 2.590296  | 0.419640  |
| 10               | 6                | 0              | 0.077103                | 2.982483  | -0.652839 |
| 11               | 6                | 0              | -1.406420               | 3.513931  | 1.196102  |

|    |   |   |           |           |           |
|----|---|---|-----------|-----------|-----------|
| 12 | 6 | 0 | 0.176304  | 4.339965  | -0.946228 |
| 13 | 1 | 0 | 0.595360  | 2.240860  | -1.250713 |
| 14 | 6 | 0 | -1.298935 | 4.868743  | 0.888614  |
| 15 | 1 | 0 | -2.027428 | 3.165884  | 2.016050  |
| 16 | 6 | 0 | -0.510669 | 5.284151  | -0.182393 |
| 17 | 1 | 0 | 0.787149  | 4.657107  | -1.786145 |
| 18 | 1 | 0 | -1.838288 | 5.597185  | 1.486311  |
| 19 | 1 | 0 | -0.431856 | 6.339656  | -0.423521 |
| 20 | 6 | 0 | 3.278783  | -3.698123 | -2.178020 |
| 21 | 6 | 0 | 2.732740  | -3.391192 | -0.751732 |
| 22 | 1 | 0 | 3.612477  | -4.738004 | -2.254222 |
| 23 | 1 | 0 | 4.128756  | -3.050959 | -2.418682 |
| 24 | 1 | 0 | 2.597572  | -4.307448 | -0.166867 |
| 25 | 1 | 0 | 3.397701  | -2.719329 | -0.199136 |
| 26 | 6 | 0 | 1.038220  | -4.228423 | -2.806014 |
| 27 | 1 | 0 | 0.299770  | -4.144914 | -3.610044 |
| 28 | 1 | 0 | 1.324146  | -5.281802 | -2.716899 |
| 29 | 6 | 0 | 0.463964  | -3.687010 | -1.465931 |
| 30 | 1 | 0 | -0.477007 | -3.148615 | -1.615404 |
| 31 | 1 | 0 | 0.293253  | -4.494183 | -0.745505 |
| 32 | 6 | 0 | 1.552371  | -1.566598 | -1.745947 |
| 33 | 1 | 0 | 0.612922  | -1.003666 | -1.706265 |
| 34 | 1 | 0 | 2.349257  | -0.939924 | -1.332284 |
| 35 | 6 | 0 | 1.889770  | -2.035464 | -3.187464 |
| 36 | 1 | 0 | 1.035053  | -1.897179 | -3.858789 |
| 37 | 1 | 0 | 2.734830  | -1.470220 | -3.593921 |

|    |   |   |           |           |           |
|----|---|---|-----------|-----------|-----------|
| 38 | 7 | 0 | 2.234597  | -3.465322 | -3.187050 |
| 39 | 7 | 0 | 1.422182  | -2.741763 | -0.877490 |
| 40 | 6 | 0 | -2.863319 | -0.591039 | 0.004420  |
| 41 | 6 | 0 | -1.882557 | -1.475531 | 0.835698  |
| 42 | 1 | 0 | -1.878163 | -2.454746 | 0.345824  |
| 43 | 6 | 0 | -4.142041 | -1.296696 | -0.148170 |
| 44 | 7 | 0 | -5.142403 | -1.862032 | -0.275994 |
| 45 | 6 | 0 | -2.464932 | -1.661049 | 2.230264  |
| 46 | 6 | 0 | -2.347514 | -0.657217 | 3.197583  |
| 47 | 6 | 0 | -3.153002 | -2.832845 | 2.551750  |
| 48 | 6 | 0 | -2.908519 | -0.823118 | 4.460382  |
| 49 | 1 | 0 | -1.810423 | 0.259070  | 2.962326  |
| 50 | 6 | 0 | -3.715017 | -3.001697 | 3.817383  |
| 51 | 1 | 0 | -3.248710 | -3.617692 | 1.804631  |
| 52 | 6 | 0 | -3.593965 | -1.997347 | 4.774081  |
| 53 | 1 | 0 | -2.807667 | -0.036682 | 5.202665  |
| 54 | 1 | 0 | -4.244998 | -3.919767 | 4.053757  |
| 55 | 1 | 0 | -4.029533 | -2.127403 | 5.760317  |
| 56 | 6 | 0 | -2.326358 | -0.305462 | -1.414190 |
| 57 | 8 | 0 | -1.784073 | -1.209999 | -2.017578 |
| 58 | 6 | 0 | -2.480140 | 1.050855  | -2.006445 |
| 59 | 6 | 0 | -3.291499 | 2.038626  | -1.437270 |
| 60 | 6 | 0 | -1.763525 | 1.331212  | -3.177590 |
| 61 | 6 | 0 | -3.377735 | 3.294978  | -2.030640 |
| 62 | 1 | 0 | -3.868614 | 1.840945  | -0.539228 |
| 63 | 6 | 0 | -1.845542 | 2.587973  | -3.763153 |

|    |   |   |           |           |           |
|----|---|---|-----------|-----------|-----------|
| 64 | 1 | 0 | -1.138152 | 0.556363  | -3.611151 |
| 65 | 6 | 0 | -2.652534 | 3.571753  | -3.188306 |
| 66 | 1 | 0 | -4.008411 | 4.058180  | -1.585345 |
| 67 | 1 | 0 | -1.280470 | 2.805178  | -4.664295 |
| 68 | 1 | 0 | -2.715338 | 4.555911  | -3.643416 |
| 69 | 6 | 0 | 6.467383  | 2.411721  | 2.036229  |
| 70 | 6 | 0 | 6.841971  | 1.088578  | 1.799760  |
| 71 | 6 | 0 | 5.904577  | 0.150650  | 1.380032  |
| 72 | 6 | 0 | 4.573401  | 0.534010  | 1.193063  |
| 73 | 6 | 0 | 4.188835  | 1.858821  | 1.424516  |
| 74 | 6 | 0 | 5.138751  | 2.786603  | 1.845573  |
| 75 | 8 | 0 | 3.693715  | -0.414473 | 0.781564  |
| 76 | 1 | 0 | -3.070446 | 0.332374  | 0.545215  |
| 77 | 1 | 0 | 7.874168  | 0.781457  | 1.943739  |
| 78 | 1 | 0 | 6.183835  | -0.882182 | 1.193533  |
| 79 | 1 | 0 | 3.152825  | 2.151048  | 1.274172  |
| 80 | 1 | 0 | 4.832366  | 3.813526  | 2.024989  |
| 81 | 1 | 0 | 7.201585  | 3.139760  | 2.366551  |

-----

**TS3b/P\_PhOH(RSR)**

SCF Done: E(RM062X) = -1896.56790669

Imaginary Frequencies = -150.9194

-----

| Center<br>Number | Atomic<br>Number | Atomic<br>Type | Coordinates (Angstroms) |   |   |
|------------------|------------------|----------------|-------------------------|---|---|
|                  |                  |                | X                       | Y | Z |



---

|    |   |   |           |           |           |
|----|---|---|-----------|-----------|-----------|
| 1  | 6 | 0 | 6.717182  | 0.745641  | -0.595070 |
| 2  | 6 | 0 | 6.996304  | 0.482322  | 0.746734  |
| 3  | 6 | 0 | 5.961577  | 0.529904  | 1.679531  |
| 4  | 6 | 0 | 4.660085  | 0.830850  | 1.283891  |
| 5  | 6 | 0 | 4.386406  | 1.078254  | -0.065449 |
| 6  | 6 | 0 | 5.421184  | 1.043160  | -1.005379 |
| 7  | 8 | 0 | 3.134792  | 1.347666  | -0.512910 |
| 8  | 8 | 0 | 1.239246  | 0.752319  | 1.389194  |
| 9  | 6 | 0 | 0.047822  | 0.598559  | 1.125078  |
| 10 | 8 | 0 | -0.770568 | 1.682602  | 0.957973  |
| 11 | 6 | 0 | -0.188822 | 2.937868  | 0.852758  |
| 12 | 6 | 0 | 0.563902  | 3.255053  | -0.274122 |
| 13 | 6 | 0 | 1.077955  | 4.543149  | -0.399510 |
| 14 | 6 | 0 | 0.831678  | 5.497382  | 0.587749  |
| 15 | 6 | 0 | 0.069335  | 5.161699  | 1.705384  |
| 16 | 6 | 0 | -0.445067 | 3.873578  | 1.845838  |
| 17 | 6 | 0 | -0.634785 | -0.663534 | 0.972684  |
| 18 | 6 | 0 | 0.089203  | -1.787118 | 1.300446  |
| 19 | 6 | 0 | -2.076123 | -0.693375 | 0.491720  |
| 20 | 6 | 0 | -2.972628 | -1.578524 | 1.358887  |
| 21 | 6 | 0 | -3.934614 | -2.457253 | 0.855063  |
| 22 | 6 | 0 | -4.753666 | -3.191557 | 1.716853  |
| 23 | 6 | 0 | -4.632966 | -3.054138 | 3.094199  |
| 24 | 6 | 0 | -3.683052 | -2.170739 | 3.609797  |
| 25 | 6 | 0 | -2.864430 | -1.447277 | 2.751508  |

|    |   |   |           |           |           |
|----|---|---|-----------|-----------|-----------|
| 26 | 6 | 0 | -2.171685 | -0.958918 | -1.047326 |
| 27 | 6 | 0 | -3.492380 | -0.485406 | -1.680417 |
| 28 | 6 | 0 | -3.787216 | 0.977965  | -1.648150 |
| 29 | 6 | 0 | -2.795108 | 1.951226  | -1.479070 |
| 30 | 6 | 0 | -3.139155 | 3.299938  | -1.460869 |
| 31 | 6 | 0 | -4.471707 | 3.681808  | -1.604956 |
| 32 | 6 | 0 | -5.463547 | 2.715359  | -1.778110 |
| 33 | 6 | 0 | -5.122235 | 1.369014  | -1.805511 |
| 34 | 6 | 0 | -1.924479 | -2.361926 | -1.388978 |
| 35 | 7 | 0 | -1.711790 | -3.468404 | -1.647637 |
| 36 | 8 | 0 | -4.270774 | -1.277096 | -2.171576 |
| 37 | 7 | 0 | 1.560466  | -2.378544 | -0.141337 |
| 38 | 6 | 0 | 1.529346  | -3.797256 | -0.534209 |
| 39 | 6 | 0 | 2.611568  | -4.030382 | -1.628794 |
| 40 | 7 | 0 | 3.513990  | -2.873432 | -1.716559 |
| 41 | 6 | 0 | 2.747338  | -1.711247 | -2.187866 |
| 42 | 6 | 0 | 1.456671  | -1.538654 | -1.341669 |
| 43 | 6 | 0 | 4.011701  | -2.573449 | -0.368164 |
| 44 | 6 | 0 | 2.841965  | -2.101904 | 0.533091  |
| 45 | 1 | 0 | -2.461271 | 0.324084  | 0.607879  |
| 46 | 1 | 0 | -4.072374 | -2.584947 | -0.212823 |
| 47 | 1 | 0 | -2.125042 | -0.765319 | 3.162752  |
| 48 | 1 | 0 | -5.488231 | -3.873366 | 1.298264  |
| 49 | 1 | 0 | -3.578642 | -2.046424 | 4.683882  |
| 50 | 1 | 0 | -5.270126 | -3.626923 | 3.761433  |
| 51 | 1 | 0 | -1.751348 | 1.673359  | -1.370973 |

|    |   |   |           |           |           |
|----|---|---|-----------|-----------|-----------|
| 52 | 1 | 0 | -5.882160 | 0.605653  | -1.939257 |
| 53 | 1 | 0 | -2.364508 | 4.050858  | -1.335607 |
| 54 | 1 | 0 | -6.501377 | 3.013410  | -1.890264 |
| 55 | 1 | 0 | -4.738551 | 4.734267  | -1.584108 |
| 56 | 1 | 0 | 2.490079  | 1.280125  | 0.224678  |
| 57 | 1 | 0 | -0.399924 | -2.759567 | 1.304623  |
| 58 | 1 | 0 | 0.946580  | -1.681216 | 1.955808  |
| 59 | 1 | 0 | 0.736479  | 2.501568  | -1.038100 |
| 60 | 1 | 0 | -1.041070 | 3.590614  | 2.707684  |
| 61 | 1 | 0 | 1.669052  | 4.800601  | -1.273015 |
| 62 | 1 | 0 | -0.125101 | 5.902406  | 2.474958  |
| 63 | 1 | 0 | 1.232572  | 6.500805  | 0.484531  |
| 64 | 1 | 0 | 2.146323  | -4.169369 | -2.609847 |
| 65 | 1 | 0 | 3.202806  | -4.922999 | -1.402813 |
| 66 | 1 | 0 | 0.527805  | -4.039336 | -0.898504 |
| 67 | 1 | 0 | 1.726691  | -4.391975 | 0.363532  |
| 68 | 1 | 0 | 3.386637  | -0.826416 | -2.098257 |
| 69 | 1 | 0 | 2.499482  | -1.852335 | -3.244450 |
| 70 | 1 | 0 | 1.313527  | -0.499936 | -1.025181 |
| 71 | 1 | 0 | 0.571952  | -1.859522 | -1.899219 |
| 72 | 1 | 0 | 2.874336  | -1.026745 | 0.722767  |
| 73 | 1 | 0 | 2.840923  | -2.619762 | 1.498126  |
| 74 | 1 | 0 | 4.781692  | -1.796616 | -0.436583 |
| 75 | 1 | 0 | 4.476168  | -3.480438 | 0.031766  |
| 76 | 1 | 0 | -1.358865 | -0.385765 | -1.510808 |
| 77 | 1 | 0 | 6.164343  | 0.332096  | 2.728338  |

|    |   |   |          |          |           |
|----|---|---|----------|----------|-----------|
| 78 | 1 | 0 | 3.850884 | 0.867745 | 2.009635  |
| 79 | 1 | 0 | 5.191772 | 1.247347 | -2.047201 |
| 80 | 1 | 0 | 7.514843 | 0.716521 | -1.332268 |
| 81 | 1 | 0 | 8.008075 | 0.245827 | 1.060355  |

-----

**TS3b/P\_PhOH(SRS)**

SCF Done: E(RM062X) = -1896.55976751

Imaginary Frequencies = -142.8607

-----

| Center<br>Number | Atomic<br>Number | Atomic<br>Type | Coordinates (Angstroms) |          |           |
|------------------|------------------|----------------|-------------------------|----------|-----------|
|                  |                  |                | X                       | Y        | Z         |
| 1                | 6                | 0              | 0.485520                | 1.265919 | -1.151630 |
| 2                | 6                | 0              | 0.808800                | 1.545403 | 0.353016  |
| 3                | 1                | 0              | -0.178067               | 1.712711 | 0.795002  |
| 4                | 6                | 0              | 1.674797                | 1.049543 | -1.979502 |
| 5                | 7                | 0              | 2.602482                | 0.866422 | -2.644940 |
| 6                | 6                | 0              | 1.590778                | 2.831400 | 0.617036  |
| 7                | 6                | 0              | 2.257155                | 3.580315 | -0.353610 |
| 8                | 6                | 0              | 1.628072                | 3.284678 | 1.944613  |
| 9                | 6                | 0              | 2.949355                | 4.744493 | -0.005504 |
| 10               | 1                | 0              | 2.241290                | 3.287760 | -1.397171 |
| 11               | 6                | 0              | 2.309511                | 4.443503 | 2.291843  |
| 12               | 1                | 0              | 1.112391                | 2.711056 | 2.711902  |
| 13               | 6                | 0              | 2.980848                | 5.180035 | 1.313029  |

|    |   |   |           |           |           |
|----|---|---|-----------|-----------|-----------|
| 14 | 1 | 0 | 3.462643  | 5.307229  | -0.779792 |
| 15 | 1 | 0 | 2.318232  | 4.774169  | 3.326413  |
| 16 | 1 | 0 | 3.519558  | 6.084275  | 1.580048  |
| 17 | 6 | 0 | -0.371722 | 2.379615  | -1.783944 |
| 18 | 8 | 0 | 0.083322  | 3.093581  | -2.653535 |
| 19 | 6 | 0 | -1.766320 | 2.566637  | -1.282386 |
| 20 | 6 | 0 | -2.453519 | 1.581439  | -0.565617 |
| 21 | 6 | 0 | -2.408019 | 3.774232  | -1.584409 |
| 22 | 6 | 0 | -3.768164 | 1.797014  | -0.162855 |
| 23 | 1 | 0 | -1.976723 | 0.635989  | -0.331512 |
| 24 | 6 | 0 | -3.714924 | 3.994048  | -1.168411 |
| 25 | 1 | 0 | -1.868262 | 4.532409  | -2.142951 |
| 26 | 6 | 0 | -4.397431 | 3.004383  | -0.459353 |
| 27 | 1 | 0 | -4.298691 | 1.020159  | 0.380064  |
| 28 | 1 | 0 | -4.205476 | 4.934931  | -1.397680 |
| 29 | 1 | 0 | -5.421400 | 3.174583  | -0.140313 |
| 30 | 6 | 0 | 1.404066  | 0.364295  | 1.107241  |
| 31 | 6 | 0 | 2.753144  | 0.126856  | 1.242251  |
| 32 | 1 | 0 | -1.207725 | -1.348393 | -0.019903 |
| 33 | 1 | 0 | 3.471766  | 0.819894  | 0.808562  |
| 34 | 1 | 0 | 3.095264  | -0.438463 | 2.102579  |
| 35 | 6 | 0 | 0.552930  | -0.526594 | 1.868171  |
| 36 | 8 | 0 | 0.891054  | -1.393789 | 2.647697  |
| 37 | 8 | 0 | -0.800559 | -0.306169 | 1.596027  |
| 38 | 6 | 0 | -1.778294 | -0.975931 | 2.325379  |
| 39 | 6 | 0 | -2.792207 | -0.192049 | 2.864447  |

|    |   |   |           |           |           |
|----|---|---|-----------|-----------|-----------|
| 40 | 6 | 0 | -1.816346 | -2.366720 | 2.390830  |
| 41 | 6 | 0 | -3.872885 | -0.815616 | 3.485043  |
| 42 | 1 | 0 | -2.730127 | 0.888843  | 2.778848  |
| 43 | 6 | 0 | -2.899475 | -2.975251 | 3.021949  |
| 44 | 1 | 0 | -1.018156 | -2.956496 | 1.952892  |
| 45 | 6 | 0 | -3.926978 | -2.206220 | 3.566420  |
| 46 | 1 | 0 | -4.671723 | -0.211014 | 3.903647  |
| 47 | 1 | 0 | -2.940939 | -4.058680 | 3.079228  |
| 48 | 1 | 0 | -4.769429 | -2.690223 | 4.050328  |
| 49 | 6 | 0 | 4.569180  | -1.207875 | -0.770950 |
| 50 | 6 | 0 | 4.948924  | -2.474083 | -1.591168 |
| 51 | 1 | 0 | 4.252619  | -0.386427 | -1.417698 |
| 52 | 1 | 0 | 5.403255  | -0.861069 | -0.152254 |
| 53 | 1 | 0 | 4.657080  | -2.358911 | -2.640143 |
| 54 | 1 | 0 | 6.028317  | -2.650686 | -1.555432 |
| 55 | 6 | 0 | 2.346266  | -2.130401 | -0.618296 |
| 56 | 1 | 0 | 1.505631  | -2.267922 | 0.069130  |
| 57 | 1 | 0 | 2.043659  | -1.415215 | -1.386754 |
| 58 | 6 | 0 | 2.813544  | -3.477532 | -1.241355 |
| 59 | 1 | 0 | 2.305999  | -4.324020 | -0.768168 |
| 60 | 1 | 0 | 2.591504  | -3.503935 | -2.312456 |
| 61 | 6 | 0 | 4.538025  | -3.747425 | 0.381377  |
| 62 | 1 | 0 | 4.113805  | -4.681085 | 0.763156  |
| 63 | 1 | 0 | 5.623669  | -3.788696 | 0.514298  |
| 64 | 6 | 0 | 3.932963  | -2.525110 | 1.127610  |
| 65 | 1 | 0 | 3.073513  | -2.801879 | 1.745632  |

|    |   |   |           |           |           |
|----|---|---|-----------|-----------|-----------|
| 66 | 1 | 0 | 4.672900  | -2.034069 | 1.768358  |
| 67 | 7 | 0 | 3.459751  | -1.543341 | 0.136087  |
| 68 | 7 | 0 | 4.259641  | -3.655067 | -1.056661 |
| 69 | 6 | 0 | -4.735229 | -2.641121 | -2.694581 |
| 70 | 6 | 0 | -3.527914 | -2.863808 | -3.357869 |
| 71 | 6 | 0 | -2.316749 | -2.551061 | -2.749401 |
| 72 | 6 | 0 | -2.311915 | -2.011193 | -1.462760 |
| 73 | 6 | 0 | -3.513028 | -1.787902 | -0.786645 |
| 74 | 6 | 0 | -4.719028 | -2.102967 | -1.409935 |
| 75 | 8 | 0 | -1.095881 | -1.710859 | -0.916213 |
| 76 | 1 | 0 | -0.075990 | 0.322177  | -1.189431 |
| 77 | 1 | 0 | -3.526702 | -3.282888 | -4.359940 |
| 78 | 1 | 0 | -1.369986 | -2.715912 | -3.254911 |
| 79 | 1 | 0 | -3.504930 | -1.370961 | 0.219004  |
| 80 | 1 | 0 | -5.650416 | -1.923243 | -0.880617 |
| 81 | 1 | 0 | -5.677363 | -2.883888 | -3.175615 |

-----

**TS3b/P\_PhOH(SSR)**

SCF Done: E(RM062X) = -1896.57256262

Imaginary Frequencies = -113.5076

-----

| Center<br>Number | Atomic<br>Number | Atomic<br>Type | Coordinates (Angstroms) |           |           |
|------------------|------------------|----------------|-------------------------|-----------|-----------|
|                  |                  |                | X                       | Y         | Z         |
| 1                | 6                | 0              | 0.091489                | -0.321147 | -1.629011 |

-----

|    |   |   |           |           |           |
|----|---|---|-----------|-----------|-----------|
| 2  | 6 | 0 | 1.151062  | -0.791604 | -2.353714 |
| 3  | 1 | 0 | -0.555693 | 1.391163  | 0.796899  |
| 4  | 1 | 0 | 1.339137  | -1.855880 | -2.449736 |
| 5  | 1 | 0 | 1.588163  | -0.152755 | -3.114893 |
| 6  | 6 | 0 | -0.193456 | 1.097492  | -1.757172 |
| 7  | 8 | 0 | 0.397651  | 1.926960  | -2.412014 |
| 8  | 8 | 0 | -1.301723 | 1.467514  | -0.979770 |
| 9  | 6 | 0 | -1.909319 | 2.700913  | -1.198006 |
| 10 | 6 | 0 | -2.273924 | 3.107421  | -2.478270 |
| 11 | 6 | 0 | -2.224862 | 3.460023  | -0.076713 |
| 12 | 6 | 0 | -2.957391 | 4.310377  | -2.628367 |
| 13 | 1 | 0 | -2.026739 | 2.492882  | -3.337090 |
| 14 | 6 | 0 | -2.915482 | 4.659337  | -0.242136 |
| 15 | 1 | 0 | -1.938594 | 3.111850  | 0.912295  |
| 16 | 6 | 0 | -3.279369 | 5.088591  | -1.515923 |
| 17 | 1 | 0 | -3.245312 | 4.636873  | -3.622984 |
| 18 | 1 | 0 | -3.166918 | 5.254141  | 0.630381  |
| 19 | 1 | 0 | -3.813908 | 6.024593  | -1.643590 |
| 20 | 6 | 0 | 3.491924  | -1.883173 | -0.690675 |
| 21 | 6 | 0 | 4.848686  | -1.650378 | 0.034002  |
| 22 | 1 | 0 | 2.729026  | -2.251450 | 0.001275  |
| 23 | 1 | 0 | 3.585794  | -2.599017 | -1.514241 |
| 24 | 1 | 0 | 4.837372  | -2.108573 | 1.028314  |
| 25 | 1 | 0 | 5.678281  | -2.086379 | -0.531891 |
| 26 | 6 | 0 | 2.704127  | 0.314681  | -0.139112 |
| 27 | 1 | 0 | 2.459686  | 1.285354  | -0.583595 |



|    |   |   |           |           |           |
|----|---|---|-----------|-----------|-----------|
| 28 | 1 | 0 | 1.806978  | -0.052399 | 0.373585  |
| 29 | 6 | 0 | 3.928465  | 0.408149  | 0.809267  |
| 30 | 1 | 0 | 4.157201  | 1.453409  | 1.043930  |
| 31 | 1 | 0 | 3.737098  | -0.116698 | 1.751651  |
| 32 | 6 | 0 | 5.279069  | 0.364027  | -1.162483 |
| 33 | 1 | 0 | 5.364200  | 1.450259  | -1.055574 |
| 34 | 1 | 0 | 6.215913  | -0.010631 | -1.586154 |
| 35 | 6 | 0 | 4.071696  | -0.010039 | -2.071886 |
| 36 | 1 | 0 | 3.658359  | 0.869552  | -2.575841 |
| 37 | 1 | 0 | 4.348844  | -0.745957 | -2.833833 |
| 38 | 7 | 0 | 3.017652  | -0.602573 | -1.236683 |
| 39 | 7 | 0 | 5.105074  | -0.211268 | 0.178218  |
| 40 | 6 | 0 | -2.127024 | -1.541218 | -1.388090 |
| 41 | 6 | 0 | -0.764339 | -1.169132 | -0.703072 |
| 42 | 1 | 0 | -1.062594 | -0.551403 | 0.144659  |
| 43 | 6 | 0 | -1.933765 | -2.197460 | -2.683441 |
| 44 | 7 | 0 | -1.760626 | -2.684978 | -3.716949 |
| 45 | 6 | 0 | -0.054961 | -2.363312 | -0.088358 |
| 46 | 6 | 0 | 0.246860  | -3.534276 | -0.793312 |
| 47 | 6 | 0 | 0.311646  | -2.280832 | 1.260671  |
| 48 | 6 | 0 | 0.920467  | -4.582931 | -0.168684 |
| 49 | 1 | 0 | -0.036878 | -3.638970 | -1.836498 |
| 50 | 6 | 0 | 0.986389  | -3.327722 | 1.885859  |
| 51 | 1 | 0 | 0.068095  | -1.378874 | 1.819520  |
| 52 | 6 | 0 | 1.296790  | -4.482109 | 1.169508  |
| 53 | 1 | 0 | 1.150372  | -5.482278 | -0.732506 |

|    |   |   |           |           |           |
|----|---|---|-----------|-----------|-----------|
| 54 | 1 | 0 | 1.264394  | -3.241869 | 2.932396  |
| 55 | 1 | 0 | 1.820952  | -5.301303 | 1.652673  |
| 56 | 6 | 0 | -2.978394 | -2.420436 | -0.466548 |
| 57 | 8 | 0 | -3.203419 | -3.578595 | -0.750950 |
| 58 | 6 | 0 | -3.457452 | -1.817219 | 0.813020  |
| 59 | 6 | 0 | -3.476627 | -0.435816 | 1.042338  |
| 60 | 6 | 0 | -3.903043 | -2.690872 | 1.812094  |
| 61 | 6 | 0 | -3.934832 | 0.061385  | 2.258992  |
| 62 | 1 | 0 | -3.147691 | 0.264016  | 0.278250  |
| 63 | 6 | 0 | -4.354686 | -2.191799 | 3.027384  |
| 64 | 1 | 0 | -3.883106 | -3.759353 | 1.621821  |
| 65 | 6 | 0 | -4.370581 | -0.814560 | 3.251471  |
| 66 | 1 | 0 | -3.951751 | 1.133313  | 2.429949  |
| 67 | 1 | 0 | -4.693887 | -2.873786 | 3.800880  |
| 68 | 1 | 0 | -4.724346 | -0.424244 | 4.201010  |
| 69 | 6 | 0 | 2.967474  | 3.617256  | 2.755391  |
| 70 | 6 | 0 | 2.562827  | 2.560392  | 3.571604  |
| 71 | 6 | 0 | 1.500388  | 1.742575  | 3.198061  |
| 72 | 6 | 0 | 0.832631  | 1.985414  | 1.996424  |
| 73 | 6 | 0 | 1.234040  | 3.035236  | 1.166802  |
| 74 | 6 | 0 | 2.300219  | 3.845490  | 1.552685  |
| 75 | 8 | 0 | -0.208078 | 1.163613  | 1.678830  |
| 76 | 1 | 0 | -2.653967 | -0.601386 | -1.593878 |
| 77 | 1 | 0 | 3.077910  | 2.368080  | 4.508432  |
| 78 | 1 | 0 | 1.176229  | 0.916265  | 3.823834  |
| 79 | 1 | 0 | 0.722838  | 3.207662  | 0.220790  |

|    |   |   |          |          |          |
|----|---|---|----------|----------|----------|
| 80 | 1 | 0 | 2.607584 | 4.660853 | 0.904210 |
| 81 | 1 | 0 | 3.796359 | 4.252384 | 3.051086 |

---
